# Supplementary material for: E-cigarette-induced pulmonary inflammation and dysregulated repair are mediated by nAChR α7 receptor: role of nAChR α7 in SARS-CoV-2 Covid-19 ACE2 receptor regulation
Source: Respir Res. 2020 Jun 18;21:154. doi: 10.1186/s12931-020-01396-y (PMC7301079; doi:10.1186/s12931-020-01396-y)
Supplement: Supplementary file 3 — Additional file 3 Table S3. [file 12931_2020_1396_MOESM3_ESM.xlsx]

## Sheet: Table S3
Gene expression	WT						WT						WT						nAChRα7 KO						nAChRα7 KO						nAChRα7 KO						p-value						p-value
	X1.AIR	X2.AIR	X3.AIR	X4.AIR	X5.AIR	X6.AIR	X7.PG	X8.PG	X9.PG	X10.PG	X11.PG	X12.PG	X13.PGN	X14.PGN	X15.PGN	X16.PGN	X17.PGN	X18.PGN	X19.AIR	X20.AIR	X21.AIR	X22.AIR	X23.AIR	X24.AIR	X25.PG	X26.PG	X27.PG	X28.PG	X29.PG	X30.PG	X31.PGN	X32.PGN	X33.PGN	X34.PGN	X35.PGN	X36.PGN	groupAir_WT - groupPG_WT	groupAir_WT - groupPGN_WT	groupPG_WT - groupPGN_WT	groupAir_KO - groupPG_KO	groupAir_KO - groupPGN_KO	groupPG_KO - groupPGN_KO	(groupAir_WT - groupPG_WT) - (groupAir_KO - groupPG_KO)	(groupAir_WT - groupPGN_WT) - (groupAir_KO - groupPGN_KO)	(groupPG_WT - groupPGN_WT) - (groupPG_KO - groupPGN_KO)	Air_PG_WT_adjp	Air_PGN_WT_adjp	PG_PGN_WT_adjp	Air_PG_KO_adjp
Birc5	4.322	4.907	4.907	4	5.044	3.907	3.585	3.7	3.459	3.585	3	4	3.459	3.907	3.807	3.459	3.459	3.807	3.807	3.17	4.322	3.807	3.459	4	4.954	3.907	3.7	4	5.209	3.907	3.7	3.907	3.907	3.7	3.907	3.807	0.000252096	0.000784293	0.686618	0.0331703	0.796729	0.0579536	8.85e-05	0.00842533	0.102987	0.0436356	0.0273725	0.808953	0.28567
Tnfsf9	3.907	4.585	4.7	4	4.087	3.585	4.322	3.459	3.585	4.087	3.459	3.807	3.459	3.585	3.807	3.585	3.459	4	3.807	3.807	3.17	3.807	4.087	3.7	5	3.907	4.644	4.087	4.322	5.322	3.7	3.907	3.907	3.7	3.907	3.807	0.0934083	0.0227425	0.511213	0.00040186	0.660419	0.00136144	0.000335138	0.0533868	0.0526878	0.395374	0.129953	0.737956	0.106869
Cd1d2	3.7	3.7	3.907	3.459	3.585	3.459	3.585	3	3.459	3.322	2.807	3.585	4.392	3.322	3.807	3.459	3.459	3.459	3.807	3.17	3.17	3.807	3.322	3.585	5	4.17	3.7	3.807	3.7	3.907	3.7	3.907	3.907	3.7	3.907	3.807	0.0720806	0.936904	0.0612529	0.00399704	0.0701263	0.227908	0.00136337	0.21372	0.0321144	0.361349	0.967211	0.274144	0.28567
Tlr12	3.322	3.7	5.087	3.459	4.248	3.459	4	3	3.459	3.322	2.807	3.585	3.807	3.322	3.807	3.459	3.459	3.807	3.807	3.17	3.459	3.807	3.322	3.585	4.858	4.087	3.7	3.807	3.7	4.907	3.7	3.907	3.907	3.7	3.907	3.807	0.0414501	0.277147	0.31571	0.0116242	0.232162	0.154131	0.00185176	0.110207	0.0892223	0.307317	0.49664	0.590331	0.28567
Ccl20	4.392	5.615	4.954	3.459	3.322	3.459	3.585	3	3.459	3.322	2.807	3.585	2.807	3.322	3.807	3.459	3.459	3.459	3.807	3.17	3.17	3.807	3.7	3.585	3.807	3.907	3.7	3.807	3.7	3.907	3.7	3.907	3.907	3.7	3.907	3.807	0.00102161	0.00274513	0.714746	0.299019	0.270165	0.94744	0.00236778	0.00413977	0.832088	0.0624883	0.0428708	0.82488	0.784475
Hoxd4	3.17	3.7	4	3.459	4.17	3.585	3.585	3	3.459	3.322	2.807	3.585	4	3.7	3.807	3.459	3.459	3.459	3.807	3.17	3.17	3.807	3.322	3.585	3.807	3.907	3.7	3.807	3.7	3.907	3.7	3.907	3.907	3.7	3.907	3.807	0.0176764	0.831008	0.0289869	0.0422563	0.0333966	0.915	0.00261755	0.094314	0.133151	0.236742	0.93266	0.213718	0.30709
Psmb9	9.09	8.892	8.845	8.405	8.951	8.873	9.155	7.814	8.229	8.455	8.205	8.679	8.271	8.129	7.622	7.794	7.331	7.907	8.728	8.103	8.735	8.735	8.6	8.771	9.713	8.721	9.308	8.524	8.925	9.022	7.901	7.895	8.109	7.435	7.508	7.913	0.0364413	1.12e-05	0.00495469	0.0349439	0.000170533	2.97e-07	0.00400979	0.508371	0.0207603	0.297199	0.00266254	0.134694	0.28567
Pdcd1	4.322	5.248	5.087	3.459	3.322	3.459	3.7	3	3.459	3.322	2.807	3.585	5.044	3.322	3.807	3.459	3.459	3.459	3.807	3.459	3.17	3.807	3.322	3.585	3.807	3.907	3.7	3.807	5.426	3.907	3.7	3.907	3.907	4.954	3.907	3.807	0.0145605	0.236225	0.178119	0.0895911	0.128743	0.849462	0.00440951	0.0592384	0.275737	0.224153	0.453631	0.436881	0.438399
Ly6g	9.152	6.17	7.077	4.807	5.555	4.907	3.585	3.459	3.585	3.322	2.807	3.585	6.755	4.524	3.807	5.7	6.358	5.833	3.807	5.209	3.585	3.807	4.459	5.858	3.807	3.907	3.7	3.807	6.066	3.907	3.7	5.977	4.644	6.714	7.14	5.358	5.69e-05	0.217954	0.00190801	0.684403	0.0775529	0.0326264	0.00531861	0.036894	0.421855	0.0417599	0.424346	0.0823812	0.985995
Fpr3	3.17	3.7	3.7	3.459	3.322	3.459	3.585	3	3.459	3.322	2.807	3.585	3	3.322	3.807	3.459	3.459	3.459	3.807	3.17	3.17	3.807	3.322	3.585	3.807	3.907	4.858	3.807	3.7	3.907	3.7	3.907	3.907	3.7	3.907	3.807	0.312231	0.768595	0.470654	0.00458521	0.0521416	0.309524	0.00700964	0.111601	0.221678	0.633088	0.919739	0.718545	0.28567
Cxcl9	3.17	5.285	4.17	3.459	4.585	4.644	3.585	3.807	3.459	3.322	3.17	3.807	4.322	4.087	3.807	3.459	4.907	4.17	3.807	3.17	3.17	5.781	3.322	3.585	4.807	4.322	3.7	3.907	6.409	5.044	3.7	3.907	4.585	5.17	3.907	3.807	0.096029	0.818679	0.147623	0.0347345	0.362774	0.208888	0.0092194	0.420367	0.059253	0.395374	0.928481	0.392592	0.28567
Ccr4	3.17	4.755	4.392	3.459	3.585	3.585	4	3	3.459	3.322	2.807	3.585	4.644	3.322	3.807	3.459	3.459	3.807	3.807	3.322	3.17	3.807	3.322	3.7	3.807	3.907	3.7	3.807	4.907	3.907	3.7	3.907	3.907	3.7	3.907	3.807	0.065893	0.760291	0.120151	0.0544692	0.225358	0.452616	0.00954076	0.28309	0.105347	0.360936	0.913345	0.351358	0.350705
Abcc8	3.17	3.7	4	3.459	3.322	3.459	3.585	3	3.459	3.322	2.807	3.585	3.585	3.322	3.807	3.459	3.459	3.459	3.807	3.17	3.17	3.807	3.322	3.585	3.807	3.907	3.7	3.807	3.7	3.907	3.7	3.907	3.907	3.7	3.907	3.807	0.123091	0.982379	0.128248	0.0278798	0.0213345	0.907469	0.00975921	0.0936667	0.314735	0.429794	0.986411	0.367712	0.28567
Trem2	5.7	5.17	5.322	4.807	4.087	4.585	5.555	4.858	4.392	5.129	4.807	5.044	5.248	4	3.807	4.392	4.7	4.807	5.555	3.807	4.7	3.807	4	4.807	5.931	5.644	5.755	5	5.17	5.931	3.7	4.524	4.459	4.954	3.907	3.807	0.948344	0.129539	0.114769	0.000509268	0.453464	5.92e-05	0.0112946	0.576841	0.0413693	0.984561	0.320139	0.350022	0.106869
Tlr11	3.17	4.585	3.907	3.7	4.087	4	3.907	3.322	3.585	3.7	3.459	3.907	5.285	3.322	3.807	3.907	3.459	4	3.807	3.459	3.17	3.807	3.585	3.585	5	3.907	3.7	3.807	4.644	4.907	3.7	3.907	4.459	4.954	3.907	3.807	0.351251	0.843076	0.260492	0.00987741	0.0538285	0.463378	0.0137011	0.211608	0.191375	0.673154	0.936184	0.532432	0.28567
Ms4a1	6.82	7.492	7.748	7.57	7.658	8.087	7.679	8.34	9	9.214	9.631	8.464	8.326	7.547	10.15	8.18	6.954	7.295	8.055	7.735	8.262	7.304	8.82	8.886	7.735	8.455	7.907	7.788	7.687	8.243	7.845	7.651	7.276	6.966	7.6	8.011	0.00397588	0.178927	0.0930962	0.581425	0.107056	0.278951	0.0143675	0.0397355	0.659089	0.120966	0.380345	0.336614	0.98028
Cstb	10.57	10.63	10.73	10.7	10.63	10.63	10.73	11	10.85	10.75	10.92	10.77	10.71	10.66	10.63	10.73	10.68	10.64	10.76	10.98	10.71	10.68	10.67	10.7	10.53	10.71	10.69	10.76	10.69	10.4	10.61	10.72	10.9	10.78	11.05	10.79	0.0328621	0.75414	0.064509	0.164892	0.494556	0.0425859	0.0146144	0.79252	0.00765011	0.2741	0.911925	0.281843	0.585651
Lta	3.17	3.7	3.585	3.459	3.322	3.459	3.585	3	3.459	3.322	2.807	3.585	3.585	3.322	3.807	3.459	3.459	3.459	3.807	3.17	3.17	3.807	3.322	3.585	3.807	3.907	3.7	3.807	3.7	3.907	3.7	3.907	3.907	3.7	3.907	3.807	0.24916	0.623224	0.10474	0.0193268	0.01438	0.901089	0.0149744	0.148639	0.282917	0.592283	0.808245	0.349452	0.28567
Cd40	6.943	6.741	7.022	7.119	7.077	7.087	7.17	7.401	7.435	7.585	7.516	6.794	7.629	7.109	7.2	7.129	7.2	7.229	7.539	7.375	7.658	6.943	7.794	7.687	7.459	7.484	7.5	7.366	6.931	7.209	7.476	7.459	7.401	7.238	7.358	7.18	0.025188	0.0733769	0.62216	0.207561	0.285554	0.842532	0.015033	0.0459271	0.625043	0.246506	0.229186	0.784959	0.650354
Ms4a2	3.17	3.7	3.585	3.807	3.322	3.459	3.585	3	3.459	3.322	2.807	3.585	2.807	3.322	3.807	3.459	3.459	3.459	3.807	3.17	3.17	3.807	3.322	3.585	3.807	3.907	3.7	3.807	3.7	3.907	3.7	3.907	3.907	3.7	3.907	3.807	0.166574	0.427209	0.545234	0.0378296	0.0296412	0.912963	0.0164293	0.036859	0.725326	0.487205	0.642565	0.737956	0.28567
Arf6	9.512	10.15	8.655	9.747	10.6	9.267	10.32	11.35	11.05	11.08	11.33	10.34	10.98	11.13	9.214	10.98	11.22	9.362	10.03	11.36	10.77	9.747	10.98	10.94	10.3	11.01	10.78	11.16	10.47	10.11	9.568	10.58	10.29	10.86	11.27	10.84	0.0013847	0.0279575	0.238559	0.998896	0.84681	0.845728	0.0187588	0.08693	0.482484	0.0725976	0.141523	0.506076	0.998896
Twistnb	7.658	7.658	7.331	7.768	7.468	7.651	7.807	8.109	8.071	8.055	8.14	7.6	8.253	7.925	8.219	7.977	8.119	7.883	7.665	8.119	7.901	7.459	8.066	8.011	7.468	7.814	8.19	7.775	7.755	7.209	7.358	7.901	7.562	8	8.371	8.05	0.0229781	0.00494441	0.532296	0.291093	0.982331	0.281355	0.0200376	0.0418822	0.744718	0.24457	0.0625724	0.737956	0.781835
2810417H13Rik	3.459	5.644	4	3.459	4	3.807	4.322	3.7	3.459	4.087	2.807	4.524	3.907	3.585	3.807	3.459	3.459	3.459	3.807	3.17	3.459	3.807	3.807	3.907	5.426	4.644	3.7	4	4.858	3.907	3.7	3.907	3.907	3.7	3.907	3.807	0.411374	0.137151	0.493612	0.0142821	0.586257	0.0494647	0.0213334	0.152164	0.346981	0.711444	0.33224	0.736405	0.28567
Traf2	8.358	8.476	8.771	8.362	8.185	8.379	8.439	8.375	8.443	8.551	8.725	8.765	8.405	8.488	8.322	8.308	8.29	8.577	8.88	8.543	8.551	8.52	8.524	8.626	8.205	8.313	8.392	8.16	8.562	8.585	8.253	8.512	8.711	8.379	8.539	8.401	0.240432	0.827341	0.166442	0.0332565	0.194887	0.374099	0.0214346	0.440676	0.111105	0.582842	0.929967	0.424197	0.28567
C4a	10.33	10.76	10.7	10.5	10.52	10.48	10.06	9.919	9.589	9.889	10.42	10.31	10.39	10.22	10.65	10.57	10.07	10.65	10.48	10.09	10.11	10.58	10.36	10.46	10.29	9.667	10.2	10.47	10.57	10.55	10.45	10.1	10.19	10.54	10.58	10.39	0.000640797	0.373328	0.00700273	0.687214	0.836988	0.543726	0.0229489	0.438157	0.118412	0.0624883	0.593755	0.138087	0.985995
Cxcr1	4.459	3.7	4	3.459	3.322	3.459	3.585	3	3.459	3.322	2.807	3.585	4.755	3.322	3.807	3.459	3.459	3.459	3.807	3.7	3.17	3.807	3.322	3.585	3.807	3.907	3.7	3.807	4.17	3.907	3.7	3.907	3.907	5.044	3.907	3.807	0.0586643	0.919019	0.072345	0.166456	0.0401812	0.474782	0.0230488	0.122801	0.428002	0.350078	0.958182	0.300007	0.585651
Ccl7	3.17	4.7	3.585	3.459	3.322	3.7	3.585	3	3.459	3.322	2.807	3.585	4.755	3.322	3.807	3.459	3.459	3.459	3.807	3.17	3.17	3.807	3.322	3.585	3.807	3.907	3.7	3.807	4	3.907	3.7	3.907	4.585	3.7	3.907	3.807	0.108659	0.807025	0.0669531	0.0955078	0.0456396	0.71955	0.023374	0.20401	0.285997	0.414999	0.928481	0.286274	0.458188
Ltb4r2	3.17	3.7	3.7	3.459	3.322	3.459	3.585	3	3.459	3.322	2.807	3.585	2.807	3.322	3.807	3.459	3.459	3.459	3.807	3.17	3.17	3.807	3.322	3.585	3.807	3.907	3.7	3.807	3.7	3.907	3.7	3.907	3.907	3.7	3.907	3.807	0.24934	0.583204	0.540284	0.0356621	0.0278149	0.911887	0.0234222	0.0516307	0.722062	0.592283	0.77409	0.737956	0.28567
Il6ra	10.49	10.05	10.14	9.486	9.956	9.993	9.98	9.424	9.317	9.574	9.386	9.993	9.443	9.388	9.583	9.572	9.685	9.881	9.763	9.524	9.57	10.4	9.39	9.931	10.35	9.533	9.693	9.671	10.15	10.12	9.688	9.585	9.579	9.6	9.459	9.541	0.021191	0.0159567	0.904309	0.358001	0.271754	0.0485717	0.02381	0.32045	0.181931	0.241471	0.1075	0.93829	0.828862
Bcl6	8.134	7.375	7.931	7.687	7.665	7.592	7.762	7.748	7.839	8.109	8.098	7.972	7.721	7.562	8.476	7.714	7.87	7.693	7.562	7.748	7.801	7.858	7.651	7.833	7.18	7.375	7.7	7.555	7.607	7.435	7.919	7.839	7.972	7.814	7.919	7.418	0.17318	0.433015	0.553258	0.0600493	0.605776	0.0190152	0.0243561	0.848251	0.0374979	0.488902	0.647318	0.741447	0.362247
Cd44	3.459	3.7	4.7	4.17	4.755	4	3.585	3	3.585	4.644	3.7	3.7	4.524	4.17	3.807	4.7	4.7	4.459	3.807	3.807	4.087	3.807	3.585	4.7	4.459	4.459	4.755	3.907	4.644	3.907	3.7	3.907	4.755	3.7	3.907	3.807	0.0911599	0.293423	0.00840016	0.122901	0.990878	0.120302	0.0250073	0.450756	0.00387071	0.394065	0.510825	0.146803	0.506795
Nrip3	3.17	3.7	3.585	3.459	4	3.807	4.087	3	3.459	3.585	2.807	3.585	3.585	3.322	3.807	3.459	3.459	3.459	3.807	3.17	3.17	3.807	3.322	3.585	3.807	3.907	3.7	3.807	3.7	3.907	3.7	3.907	3.907	3.7	3.907	3.807	0.222987	0.518053	0.559824	0.0496556	0.039743	0.918019	0.0268079	0.0565864	0.733606	0.552948	0.72567	0.744404	0.335097
Il5ra	3.17	3.7	3.7	3.459	3.322	3.459	3.585	3	3.459	3.322	2.807	3.585	4.322	3.322	3.807	3.459	3.459	3.459	3.807	3.17	3.17	3.807	3.322	3.585	3.807	3.907	3.7	3.807	3.7	3.907	3.7	3.907	3.907	3.7	3.907	3.807	0.261797	0.277226	0.0316489	0.0404724	0.0318793	0.914203	0.0270272	0.426495	0.140218	0.611506	0.49664	0.217955	0.300068
H2-Q1	10.23	10.21	9.911	9.36	10.01	10.01	10.24	9.157	9.331	9.671	9.333	9.967	9.335	9.269	8.741	8.845	8.889	9.103	9.922	9.255	9.711	9.676	9.545	9.6	10.61	9.585	10.07	9.364	9.683	9.87	9.114	8.983	9.039	8.889	8.849	9.182	0.0679269	1.27e-05	0.00258239	0.180297	0.00184588	3.96e-05	0.0278488	0.221544	0.29796	0.361349	0.00266254	0.105304	0.601536
Cxcl5	6.409	6.17	5.755	3.459	3.459	3.459	4.322	3	3.459	3.322	2.807	3.907	4.392	3.322	3.807	3.459	3.459	3.459	5.129	3.7	3.17	3.807	5	3.585	5.285	3.907	3.7	3.807	3.7	3.907	3.7	3.907	3.907	3.7	3.907	3.807	0.00247213	0.00785708	0.655625	0.971983	0.546667	0.570084	0.0281929	0.12505	0.47428	0.0904226	0.0812268	0.794106	0.997825
Serpinb7	3.17	3.7	3.459	3.459	3.322	3.459	3.585	3	3.459	3.322	2.807	3.585	4.087	3.322	3.807	3.459	3.459	3.459	3.807	3.17	3.17	3.807	3.322	3.585	3.807	3.907	3.7	3.807	3.7	3.907	3.7	3.907	3.907	3.7	3.907	3.807	0.349757	0.239659	0.0394985	0.0280532	0.0214774	0.907579	0.0282504	0.394575	0.16087	0.673154	0.454546	0.229977	0.28567
Tigit	3.17	3.7	3.322	3.459	3.322	3.459	3.585	3	3.459	3.322	2.807	3.585	2.807	3.322	3.807	3.459	3.459	3.459	3.807	3.17	3.17	3.807	3.322	3.585	3.807	3.907	3.7	3.807	3.907	3.907	3.7	3.907	3.907	3.7	3.907	3.807	0.448985	0.893191	0.532398	0.0189548	0.0250986	0.903904	0.0287792	0.0883667	0.598147	0.7456	0.949881	0.737956	0.28567
Ptgdr	3.585	3.7	3	3.459	3.322	3.459	3.585	3	3.459	3.322	2.807	4	4.585	3.322	3.807	3.459	3.459	3.459	3.807	3.17	3.17	3.807	3.322	3.585	3.807	3.907	5	3.807	3.7	4.807	3.7	3.907	4.585	3.7	3.907	3.807	0.802804	0.270983	0.179638	0.00547386	0.0583617	0.316703	0.0290729	0.55513	0.100904	0.929429	0.491116	0.436881	0.28567
Cd163	6.883	6.943	6.943	7.119	7.209	7.295	7.17	6.977	6.966	6.476	6.7	6.768	7.375	6.977	8.384	7.14	6.931	7	6.7	6.629	6.087	7.219	5.358	6.919	7.384	7.055	6.858	6.629	7.358	7.033	7.011	7.119	6.443	7.547	7.409	6.858	0.369928	0.342319	0.07022	0.0269397	0.0241705	0.962262	0.0292379	0.328509	0.205998	0.68653	0.568466	0.294523	0.28567
Il23a	3.17	3.7	3.7	3.459	3.322	3.459	3.585	3	3.459	3.322	2.807	3.585	4.392	3.322	3.807	3.459	3.459	3.459	3.807	3.17	3.17	3.807	3.322	3.585	3.807	3.907	3.7	3.807	3.7	3.907	3.7	3.907	3.907	3.7	3.907	3.807	0.271493	0.255744	0.0296993	0.0444765	0.0352922	0.915952	0.0300728	0.466889	0.13481	0.616005	0.47765	0.213718	0.315352
Ccl24	4.322	4.755	4.755	3.7	4	4.392	4.248	3.459	3.459	3.585	2.807	3.585	5.248	4.17	3.807	3.459	3.459	4.17	3.807	3.7	4	3.807	4.392	4.392	4.392	3.907	3.7	3.807	4.392	4.807	3.7	3.907	3.907	5.615	3.907	3.807	0.0117668	0.374535	0.0859373	0.615595	0.679833	0.928402	0.0316045	0.358671	0.197179	0.211675	0.593755	0.317422	0.98028
Tapbp	11.26	10.78	11.15	11.21	10.87	11.05	11.07	10.44	10.59	10.67	10.7	10.81	10.68	10.59	10.56	10.64	10.4	10.9	11.01	10.69	10.97	10.89	11.05	10.84	11.09	10.81	11.08	10.82	11.06	10.75	11.02	10.75	10.78	10.54	10.39	10.6	0.00626978	0.000909141	0.469621	0.819873	0.0580933	0.0355451	0.03277	0.240027	0.308483	0.153401	0.0278046	0.718545	0.985995
Oscar	3.17	3.7	3.459	3.459	3.322	3.459	3.585	3	3.459	3.322	2.807	3.585	2.807	3.322	3.807	3.459	3.459	3.459	3.807	3.17	3.17	3.807	3.322	3.585	3.807	3.907	3.7	3.807	3.7	3.907	3.7	3.907	3.907	3.7	3.907	3.807	0.364774	0.773517	0.533693	0.032934	0.0255289	0.910446	0.0331547	0.0718287	0.717701	0.686301	0.921021	0.737956	0.28567
Mpo	3.17	3.7	4.459	3.459	3.322	3.459	3.585	3	3.459	3.322	2.807	3.585	4.858	3.322	3.807	3.459	3.459	3.459	3.807	3.17	3.17	3.807	3.322	3.585	3.807	3.907	3.7	3.807	3.7	3.907	3.7	3.907	3.907	3.7	3.907	3.807	0.146108	0.517786	0.0397916	0.115494	0.0988023	0.934948	0.03537	0.46475	0.1547	0.454596	0.72567	0.229977	0.493579
Flnb	8.464	8.145	8.061	8.618	8.728	8.322	8.185	8.028	8.082	8.16	8.124	7.907	8.758	8.551	8.414	8.69	8.267	8.451	8.033	8.512	8.596	7.895	8.555	8.195	8.596	8.093	8.326	8.551	8.527	8.253	8.562	8.697	8.811	8.484	8.585	8.5	0.0235713	0.316177	0.00184926	0.477287	0.023502	0.106647	0.0359562	0.343025	0.228559	0.24457	0.533503	0.0823812	0.939132
Tnfsf4	3.17	3.7	3.17	3.459	3.322	3.459	3.585	3	3.459	3.322	2.807	3.585	3.459	3.322	3.807	3.459	3.459	3.459	3.807	3.17	3.17	3.807	3.322	3.585	3.807	3.907	3.7	3.807	3.7	3.907	3.7	3.907	3.907	3.7	3.907	3.807	0.52158	0.401428	0.143858	0.0203495	0.0152006	0.901974	0.0363695	0.233966	0.338465	0.807678	0.620312	0.388205	0.28567
Cd40lg	3.17	4.585	4.858	3.459	3.585	3.459	3.585	3.585	3.459	3.322	3.7	3.585	4.807	3.322	3.807	3.459	3.459	3.459	3.807	3.17	3.17	3.807	3.322	4.322	4.585	4.7	3.7	3.807	4	3.907	3.7	3.907	3.907	4.858	3.907	3.807	0.256067	0.624699	0.512383	0.0654987	0.13576	0.708593	0.0378596	0.162015	0.467627	0.600489	0.808245	0.737956	0.372202
Tnf	3.807	3.7	4.585	3.459	3.807	4	3.907	3	3.459	3.322	2.807	3.585	4.858	3.322	3.807	3.459	3.459	3.459	5.044	3.807	3.585	3.807	4.459	3.907	4.644	4.392	4.644	3.807	3.7	5.426	3.7	3.907	4.459	5.044	3.907	3.807	0.0688776	0.572014	0.198906	0.258241	0.902484	0.311856	0.0396559	0.626736	0.107885	0.361349	0.769143	0.462017	0.737762
Nfkbia	9.819	9.439	9.849	9.29	9.399	9.646	9.077	9.14	9.482	8.785	9.226	8.913	9.315	9.231	8.901	9.692	9.78	10.3	9.082	9.786	9.453	8.775	9.205	9.85	9.585	9.253	8.969	9.69	10.06	9.516	10.17	9.311	9.728	10.1	10.02	10.16	0.0290591	0.857634	0.0432606	0.460121	0.0108307	0.0588962	0.0396765	0.049519	0.918435	0.263325	0.940961	0.242392	0.932855
En1	3.17	3.7	3.17	3.459	3.322	3.459	3.585	3	3.459	3.322	2.807	3.585	3.17	3.322	3.807	3.459	3.459	3.459	3.807	3.17	3.17	3.807	3.322	3.585	3.807	3.907	3.7	3.807	3.7	3.907	3.7	3.907	3.907	3.7	3.907	3.807	0.531569	0.634623	0.274324	0.0232995	0.0175852	0.904317	0.0407817	0.161978	0.488477	0.816259	0.815785	0.547172	0.28567
Kcnab1	3.7	4.524	4.644	3.459	3.807	4.322	3.585	3	3.459	4.392	2.807	3.585	4.858	3.322	3.807	3.459	3.459	4.524	3.807	4.459	3.459	3.807	3.322	3.585	3.807	4.17	3.7	4	4.322	3.907	3.7	3.907	3.907	5.17	3.907	3.807	0.0405306	0.5498	0.135671	0.394337	0.257473	0.774005	0.0418583	0.223032	0.386646	0.307317	0.753634	0.377454	0.864009
Lrp6	9.039	9.071	9.16	9.195	9.103	9.288	9.05	9.175	9.197	9.243	9.322	9.09	8.827	9.05	9.047	9.095	9.15	9.155	9.15	9.271	9.324	9.451	9.384	9.322	8.994	9.011	9.226	9.165	9.142	9.116	9.276	9.177	9.441	9.129	9.18	9.05	0.655425	0.286345	0.134712	0.0160316	0.195313	0.231079	0.0421558	0.867151	0.0602107	0.875342	0.505234	0.377454	0.28567
Acly	10.52	10.07	10.08	10.6	10.32	10.27	10.26	10.76	10.81	10.6	10.56	10.06	10.84	10.96	10.72	10.64	10.63	10.22	10.23	10.95	10.6	10.28	10.89	10.58	10.25	10.79	10.41	10.48	10.15	10.02	10.49	10.84	10.81	10.61	10.78	10.58	0.191767	0.0219347	0.290042	0.118887	0.520322	0.0313116	0.046028	0.222502	0.411533	0.514618	0.127778	0.567514	0.498645
Serpinb2	3.17	3.7	3.7	3.459	3.907	5.585	3.585	3	3.459	3.322	2.807	4.17	3.807	3.322	3.807	3.459	3.459	4.248	3.807	3.17	3.17	3.807	3.322	3.585	3.807	3.907	3.7	3.807	3.7	3.907	5.392	3.907	3.907	3.7	3.907	3.807	0.0792297	0.424142	0.323109	0.270111	0.0397103	0.314256	0.0460798	0.0447848	0.98946	0.380907	0.639339	0.598894	0.746308
Il13	3.17	3.7	3.17	3.459	3.322	3.459	3.585	3	3.459	3.322	2.807	3.585	4	3.322	3.807	3.459	3.459	3.459	3.807	3.17	3.17	3.807	3.322	3.585	3.807	3.907	3.7	3.807	3.7	3.907	3.7	3.907	3.907	3.7	3.907	3.807	0.544159	0.159645	0.0483699	0.0275181	0.0210365	0.907238	0.0469414	0.489954	0.180683	0.826942	0.357073	0.249844	0.28567
Stat4	3.17	3.7	4.459	3.459	3.322	4	3.585	4.087	4.755	5.129	4.807	3.585	5.17	4.459	3.807	4.087	5.459	3.459	3.807	5.322	4.087	3.807	4	4.087	3.807	4	3.7	3.807	4	3.907	3.7	5.322	3.907	3.7	3.907	3.807	0.0597132	0.0349273	0.803561	0.343767	0.698967	0.572116	0.0476331	0.0760259	0.822425	0.350835	0.15563	0.88032	0.819236
Cdh4	4.954	5.426	4.954	5.322	5.615	4.7	4.755	3.459	4.248	4.644	4.524	5.248	5	4.524	3.807	4.807	5	4.858	5.129	4.392	5	3.807	4.755	5.672	5.392	4.322	4.644	4.585	5.087	5.644	3.7	3.907	4.459	5.087	3.907	3.807	0.0236367	0.0937199	0.520789	0.597225	0.0309412	0.00879492	0.0478352	0.710183	0.0207703	0.24457	0.263565	0.737956	0.98028
Ccr3	3.17	3.7	3.7	3.459	3.322	3.459	3.585	3	3.459	3.322	2.807	3.585	4.7	3.322	3.807	3.459	3.459	3.459	3.807	3.17	3.17	3.807	3.322	3.585	3.807	3.907	3.7	3.807	3.7	3.907	3.7	3.907	3.907	3.7	3.907	3.807	0.318309	0.188025	0.024628	0.0671299	0.0550179	0.923828	0.047938	0.650591	0.119477	0.637068	0.390896	0.211103	0.372202
Cxcl12	10.08	10.06	10.49	10.41	10.27	10.1	10.14	10.39	10.43	10.31	10.51	10.25	10.33	10.35	10.92	10.41	10.26	10.6	10.58	10.72	10.72	9.914	10.59	10.49	9.604	10.25	10.23	10.39	10.48	10.13	10.94	10.73	10.79	10.5	10.34	10.42	0.484541	0.105634	0.345164	0.0350659	0.426576	0.00512184	0.0479758	0.547363	0.157202	0.785106	0.28239	0.620958	0.28567
Crabp2	3.17	3.7	3	3.459	3.322	5.728	3.585	3	3.459	3.322	2.807	3.585	2.807	3.322	3.807	3.459	3.459	3.459	3.807	3.17	3.17	3.807	3.322	3.585	3.807	3.907	3.7	3.807	3.7	3.907	3.7	3.907	3.907	3.7	3.907	3.807	0.109389	0.203514	0.729554	0.22547	0.2033	0.950285	0.0498665	0.0756433	0.841058	0.414999	0.406538	0.836707	0.667319
Insr	8.48	8.017	8.331	7.96	8.022	8.185	8.238	7.714	7.966	7.972	7.966	8.061	7.954	7.895	8.285	7.775	7.679	8.028	8.033	7.741	8.033	8.124	7.814	8.087	8.16	8.044	8.253	8.033	8.195	8.17	8.011	7.539	7.768	8.129	7.508	8.066	0.150581	0.0686981	0.683613	0.171834	0.276099	0.0175271	0.0507963	0.586968	0.148398	0.466358	0.225109	0.80817	0.592142
Dusp1	12.27	11.97	12.28	12.36	12.23	12.43	11.98	13.04	13.13	12.66	13	11.83	12.44	12.46	11.42	12.3	12.8	12.58	11.53	13	12.74	11.54	13.19	13.13	11.29	12.4	11.78	12.66	12.6	11.46	13.08	12.69	12.75	13.64	13.37	12.94	0.240479	0.794998	0.357269	0.103822	0.0662052	0.00113746	0.0508031	0.254697	0.00319453	0.582842	0.928481	0.632208	0.479277
Prok2	6.845	3.7	3	3.459	3.322	3.459	3.585	3	3.459	3.322	2.807	3.585	4.087	3.322	3.807	3.459	3.459	3.459	3.807	3.17	3.17	3.807	3.322	3.585	3.807	3.907	3.7	3.807	3.7	3.907	3.7	3.907	3.907	3.7	3.907	3.807	0.0630687	0.302331	0.386688	0.35388	0.330288	0.96215	0.0510907	0.159512	0.561474	0.351382	0.522144	0.655494	0.822277
Tnfrsf14	9.18	8.637	8.738	8.165	8.484	8.527	8.886	7.331	7.672	7.983	7.827	8.655	7.954	7.637	7.672	7.637	7.219	7.637	8.937	7.547	8.629	8.997	8.322	8.6	9.322	8.366	8.476	8.165	8.662	8.735	8.011	7.435	7.96	7.658	8.017	7.644	0.0240564	0.000205577	0.0777372	0.629632	0.00493002	0.00136797	0.0519014	0.41408	0.24199	0.24457	0.0125745	0.305129	0.98028
Adamts1	10.99	10.49	10.94	10.97	10.82	11.07	10.49	11.44	11.37	10.66	11.34	10.6	10.46	10.65	9.82	10.45	10.98	11.1	10.38	11.57	10.87	10.47	11.29	11	9.496	10.04	10.52	10.54	11.17	10.08	11.25	10.82	10.92	11.98	10.82	10.6	0.686924	0.241323	0.119336	0.0199987	0.598845	0.00547389	0.0519094	0.231435	0.00280368	0.875342	0.456523	0.351358	0.28567
Il33	8.88	8.731	9.053	9.197	8.401	8.665	9.028	9.926	9.858	8.992	9.058	8.447	10.29	10.21	9.066	9.664	9.794	9.549	8.922	10.48	8.974	7.531	9.736	9.414	7.913	9.02	9.344	9.087	8.592	7.989	8.974	9.748	9.622	9.692	9.804	9.388	0.22529	0.00621117	0.0999492	0.116068	0.268148	0.00992772	0.052231	0.211323	0.464034	0.556778	0.0701384	0.343872	0.493579
Msc	3.7	4.585	3.17	3.459	3.322	3.459	3.585	3	3.459	3.322	2.807	3.585	4.644	3.322	3.807	3.459	3.459	3.459	3.807	3.17	3.17	3.807	3.322	4	3.807	3.907	3.7	3.807	3.7	3.907	3.7	3.907	3.907	3.7	3.907	3.807	0.124722	0.713531	0.0603802	0.215608	0.188182	0.935627	0.0531583	0.495787	0.196464	0.429794	0.877272	0.27254	0.656465
Ccl25	4.248	6.066	5.129	4	4.17	5.209	4.248	4.524	4.585	4.392	4.17	4.392	5.044	4.459	3.807	4.392	5.285	5.044	5.209	3.807	4.392	3.807	4.248	4	4.392	4.459	5.524	4.248	4.17	5.209	3.7	3.907	4.755	3.7	3.907	3.807	0.170381	0.661559	0.343867	0.165804	0.353075	0.0245372	0.0546935	0.725719	0.0252198	0.487205	0.834337	0.620144	0.585651
Adamts14	4.17	6	5.248	4.7	5.209	5.555	4.392	4	4.322	4.858	3.585	4.807	4.524	4.248	3.807	3.807	4.807	5.7	5.129	4.807	4.858	5.781	4.585	5.209	5.7	4.954	4.644	4.585	5.672	5.426	5.285	3.907	4.907	5.17	3.907	5.459	0.0177395	0.0509599	0.639854	0.757667	0.384514	0.2417	0.0554293	0.423478	0.247688	0.236742	0.194815	0.786688	0.985995
Ephb6	4.907	6.109	5.044	3.459	4.248	5.209	4.322	3	3.459	3.322	2.807	4.392	2.807	3.322	3.807	3.459	3.459	4	6.044	3.17	3.7	6.409	3.322	4.755	5.755	4.17	3.7	4.248	4.087	5.755	3.7	3.907	3.907	3.7	3.907	3.807	0.0110476	0.00749123	0.8758	0.912484	0.125673	0.102065	0.0556291	0.370863	0.288685	0.211675	0.0785509	0.920837	0.991501
Ido2	3.17	3.7	3.17	3.459	3.322	3.459	3.585	3	3.459	3.322	2.807	3.585	4.17	3.322	3.807	3.459	3.459	3.459	3.807	3.17	3.17	3.807	3.322	3.585	3.807	3.907	3.7	3.807	3.7	3.907	3.7	3.907	3.907	3.7	3.907	3.807	0.560053	0.125147	0.0380893	0.0337303	0.0261946	0.910877	0.055748	0.596148	0.156743	0.833292	0.312441	0.229977	0.28567
Ccl1	3.17	3.7	3	3.459	3.322	3.459	3.585	3	3.459	3.322	2.807	3.585	3.459	3.322	3.807	3.459	3.459	3.459	3.807	3.17	3.17	3.807	3.322	3.585	3.807	3.907	3.7	3.807	3.7	3.907	3.7	3.907	3.907	3.7	3.907	3.807	0.673269	0.309049	0.154281	0.0235794	0.0178127	0.904525	0.0561113	0.307929	0.35107	0.875342	0.526587	0.404437	0.28567
Ceacam2	3.17	3.7	3	3.459	3.322	3.459	3.585	3	3.459	3.322	2.807	3.585	3.459	3.322	3.807	3.459	3.459	3.459	3.807	3.17	3.17	3.807	3.322	3.585	3.807	3.907	3.7	3.807	3.7	3.907	3.7	3.907	3.907	3.7	3.907	3.807	0.673269	0.309049	0.154281	0.0235794	0.0178127	0.904525	0.0561113	0.307929	0.35107	0.875342	0.526587	0.404437	0.28567
Aif1	3.17	3.7	3	3.459	3.322	3.459	3.585	3	3.459	3.322	2.807	3.585	3.585	3.322	3.807	3.459	3.459	3.459	3.807	3.17	3.17	3.807	3.322	3.585	3.807	3.907	3.7	3.807	3.7	3.907	3.7	3.907	3.907	3.7	3.907	3.807	0.673776	0.245135	0.117498	0.0237925	0.0179862	0.904682	0.056496	0.360943	0.300547	0.875342	0.461357	0.350022	0.28567
Elane	3.17	3.7	3	3.459	3.322	3.459	3.585	3	3.459	3.322	2.807	3.585	3.585	3.322	3.807	3.459	3.459	3.459	3.807	3.17	3.17	3.807	3.322	3.585	3.807	3.907	3.7	3.807	3.7	3.907	3.7	3.907	3.907	3.7	3.907	3.807	0.673776	0.245135	0.117498	0.0237925	0.0179862	0.904682	0.056496	0.360943	0.300547	0.875342	0.461357	0.350022	0.28567
Fzd9	3.17	3.7	3.17	3.459	3.322	3.459	3.585	3	3.459	3.322	2.807	3.585	2.807	3.322	3.807	3.459	3.459	3.459	3.807	3.17	3.17	3.807	3.322	3.585	3.807	3.907	3.7	3.807	3.7	3.907	3.7	3.907	3.907	3.7	3.907	3.807	0.56206	0.970683	0.537748	0.0345912	0.0269159	0.911333	0.0569471	0.116329	0.720386	0.833292	0.978684	0.737956	0.28567
Bmp8a	3.17	3.7	3	3.459	3.322	3.459	3.585	3	3.459	3.322	2.807	3.585	3.322	3.322	3.807	3.459	3.459	3.459	3.807	3.17	3.17	3.807	3.322	3.585	3.807	3.907	3.7	3.807	3.7	3.907	3.7	3.907	3.907	3.7	3.907	3.807	0.67516	0.394724	0.207819	0.0243824	0.0184668	0.905109	0.057556	0.260258	0.41597	0.875342	0.612531	0.470573	0.28567
Prg3	3.17	3.7	3	3.459	3.322	3.459	3.585	3	3.459	3.322	2.807	3.585	3.322	3.322	3.807	3.459	3.459	3.459	3.807	3.17	3.17	3.807	3.322	3.585	3.807	3.907	3.7	3.807	3.7	3.907	3.7	3.907	3.907	3.7	3.907	3.807	0.67516	0.394724	0.207819	0.0243824	0.0184668	0.905109	0.057556	0.260258	0.41597	0.875342	0.612531	0.470573	0.28567
H2-T23	10.54	10.77	10.28	8.963	10.03	9.836	10.45	8.366	8.547	9.124	8.662	10.17	9.175	8.849	8.558	8.626	8.397	9.246	10.5	8.651	9.649	10.9	9.422	9.683	10.86	9.358	10.05	9.162	9.908	10.45	9.331	8.752	9.003	8.752	8.017	8.845	0.0265801	0.00159877	0.268826	0.657002	0.00896833	0.00285958	0.058635	0.640328	0.146154	0.253374	0.0335284	0.543576	0.985995
Fas	9.192	8.455	9.014	9.127	9.375	9.236	8.731	8.596	8.512	8.317	8.366	8.165	8.741	8.788	7.728	9.066	9.039	9.506	8.257	9.397	8.758	8.611	8.492	8.655	8.697	8.349	8.304	8.919	8.867	8.629	8.748	8.687	8.845	8.629	8.585	8.907	0.00394449	0.209043	0.07717	0.736699	0.847827	0.59798	0.0590096	0.304608	0.367106	0.120966	0.413579	0.305129	0.985995
Ccl4	3.17	3.7	3	3.459	3.322	3.459	3.585	3	3.459	3.322	2.807	3.585	3.807	3.322	3.807	3.459	3.459	3.459	3.807	3.17	3.17	3.807	3.322	3.585	3.807	3.907	3.7	3.807	3.7	3.907	3.7	3.907	3.907	3.7	3.907	3.807	0.67975	0.164228	0.0750503	0.0264324	0.020144	0.906527	0.0611919	0.474899	0.232288	0.875342	0.361958	0.304347	0.28567
Ctsg	3.17	3.7	3	3.459	3.322	3.459	3.585	3	3.459	3.322	2.807	3.585	3.807	3.322	3.807	3.459	3.459	3.459	3.807	3.17	3.17	3.807	3.322	3.585	3.807	3.907	3.7	3.807	3.7	3.907	3.7	3.907	3.907	3.7	3.907	3.807	0.67975	0.164228	0.0750503	0.0264324	0.020144	0.906527	0.0611919	0.474899	0.232288	0.875342	0.361958	0.304347	0.28567
Il10	3.17	3.7	3	3.459	3.322	3.459	3.585	3	3.459	3.322	2.807	3.585	3.17	3.322	3.807	3.459	3.459	3.459	3.807	3.17	3.17	3.807	3.322	3.585	3.807	3.907	3.7	3.807	3.7	3.907	3.7	3.907	3.907	3.7	3.907	3.807	0.680073	0.508198	0.285916	0.0265821	0.0202669	0.906626	0.0614547	0.218668	0.499007	0.875342	0.720035	0.564146	0.28567
Retnlb	3.17	3.7	3	3.459	3.322	3.459	3.585	3	3.459	3.322	2.807	3.585	3.17	3.322	3.807	3.459	3.459	3.459	3.807	3.17	3.17	3.807	3.322	3.585	3.807	3.907	3.7	3.807	3.7	3.907	3.7	3.907	3.907	3.7	3.907	3.807	0.680073	0.508198	0.285916	0.0265821	0.0202669	0.906626	0.0614547	0.218668	0.499007	0.875342	0.720035	0.564146	0.28567
Malt1	7.585	7.322	8.2	7.366	7.615	7.687	7.925	7.637	7.972	7.966	8.214	7.755	7.418	7.375	7.57	7.34	7.375	7.562	7.524	7.768	7.833	7.762	7.919	7.801	7.735	7.665	7.741	7.468	7.762	7.877	7.622	7.358	7.313	7.322	6.943	7.459	0.0311877	0.140772	0.00067951	0.63606	0.00161625	0.00563929	0.0623066	0.180503	0.577532	0.272521	0.336782	0.0823812	0.98028
Cd34	9.889	9.899	9.88	10.67	10.33	10.23	10.28	10.83	10.71	10.49	10.53	9.819	10.42	10.55	11.31	10.47	10.42	10.54	10.26	10.79	10.58	9.695	10.51	10.11	9.817	10.37	10.22	10.52	10.07	9.624	10.74	10.55	10.61	10.34	10.53	10.18	0.130893	0.0188025	0.361706	0.252355	0.382832	0.0486117	0.0637641	0.26897	0.432091	0.436398	0.117207	0.632208	0.726387
Gnai3	10.21	10.05	10.17	10.29	10.23	9.982	10.18	10.45	10.31	10.24	10.28	10.08	10.21	10.22	9.831	10.4	10.49	10.12	10.03	10.41	10.21	10.44	10.23	10.07	9.892	9.932	10.09	10.15	10.21	9.94	10.22	10.4	10.2	10.57	10.57	10.05	0.361544	0.609304	0.684853	0.0828853	0.352272	0.0101245	0.0637714	0.764208	0.0334315	0.686301	0.797199	0.80817	0.415018
Il4	3.17	3.7	3.17	3.459	3.322	3.459	3.585	3	3.459	3.322	2.807	3.585	4.322	3.322	3.807	3.459	3.459	3.459	3.807	3.17	3.17	3.807	3.322	3.585	3.807	3.907	3.7	3.807	3.7	3.907	3.7	3.907	3.907	3.7	3.907	3.807	0.576292	0.103868	0.0322868	0.0412269	0.0325204	0.914544	0.0660398	0.694053	0.141753	0.840951	0.28029	0.217955	0.302606
Gata1	3.17	3.7	3.585	3.459	3.322	3.459	3.585	3	3.459	3.322	2.807	3.585	4.858	3.322	3.807	3.459	3.459	3.459	3.807	3.17	3.17	3.807	3.322	3.585	3.807	3.907	3.7	3.807	3.7	3.907	3.7	3.907	3.907	3.7	3.907	3.807	0.396075	0.135332	0.0228143	0.0804066	0.0668444	0.927423	0.0685597	0.797774	0.113629	0.705629	0.330288	0.209322	0.409472
H2-Eb1	11.12	11.44	11.08	10.74	11.28	11.2	11.32	10.57	10.58	10.73	10.74	11.13	10.82	10.53	10.92	10.72	10.38	11.08	11.5	10.77	10.95	11.17	11.11	11.17	11.98	10.97	11.2	10.78	11.23	11.45	11.05	10.7	10.83	10.36	10.48	10.58	0.0902076	0.0249923	0.549288	0.365694	0.0138058	0.00131255	0.0686621	0.858697	0.0472572	0.394065	0.134885	0.739483	0.82998
Myod1	3.17	3.7	3	3.459	3.322	3.459	3.585	3	3.459	3.322	2.807	3.585	3	3.322	3.807	3.459	3.459	3.459	3.807	3.17	3.17	3.807	3.322	3.585	3.807	3.907	3.7	3.807	3.7	3.907	3.7	3.907	3.907	3.7	3.907	3.807	0.6886	0.652207	0.39654	0.0308116	0.0237608	0.909249	0.0687354	0.184156	0.602221	0.875342	0.823959	0.664098	0.28567
Scin	3.17	3.7	3	3.459	3.322	3.459	3.585	3	3.459	3.322	2.807	3.585	3	3.322	3.807	3.459	3.459	3.459	3.807	3.17	3.17	3.807	3.322	3.585	3.807	3.907	3.7	3.807	3.7	3.907	3.7	3.907	3.907	3.7	3.907	3.807	0.6886	0.652207	0.39654	0.0308116	0.0237608	0.909249	0.0687354	0.184156	0.602221	0.875342	0.823959	0.664098	0.28567
Tpsb2	3.17	3.7	3	3.459	3.322	3.459	3.585	3	3.459	3.322	2.807	3.585	3	3.322	3.807	3.459	3.459	3.459	3.807	3.17	3.17	3.807	3.322	3.585	3.807	3.907	3.7	3.807	3.7	3.907	3.7	3.907	3.907	3.7	3.907	3.807	0.6886	0.652207	0.39654	0.0308116	0.0237608	0.909249	0.0687354	0.184156	0.602221	0.875342	0.823959	0.664098	0.28567
Ceacam1	7.913	7.607	7.839	8.362	7.833	7.87	8.022	8.397	8.516	8.665	8.543	7.845	8.443	8.271	7.516	8.459	8.033	8.322	7.637	8.658	8.48	7.435	8.508	8.29	7.735	8.257	8.129	8.379	8.313	7.585	7.87	8.248	8.344	8.464	8.418	8.281	0.0392742	0.183901	0.434482	0.612537	0.608481	0.311309	0.0690308	0.556251	0.207308	0.306871	0.385666	0.69788	0.98028
Fcnb	3.17	3.7	3	3.459	3.322	3.459	3.585	3	3.459	3.322	2.807	3.585	4	3.322	3.807	3.459	3.459	3.459	3.807	3.17	3.17	3.807	3.322	3.585	3.807	3.907	3.7	3.807	3.7	3.907	3.7	3.907	3.907	3.7	3.907	3.807	0.689489	0.119692	0.0538458	0.0312844	0.0241539	0.909522	0.0695335	0.590575	0.191406	0.875342	0.305154	0.256642	0.28567
Havcr1	3.17	3.7	3	3.459	3.322	3.459	3.585	3	3.459	3.322	2.807	3.585	4	3.322	3.807	3.459	3.459	3.459	3.807	3.17	3.17	3.807	3.322	3.585	3.807	3.907	3.7	3.807	3.7	3.907	3.7	3.907	3.907	3.7	3.907	3.807	0.689489	0.119692	0.0538458	0.0312844	0.0241539	0.909522	0.0695335	0.590575	0.191406	0.875342	0.305154	0.256642	0.28567
Phlda2	3.17	3.7	3	3.459	3.322	3.459	3.585	3	3.459	3.322	2.807	3.585	4	3.322	3.807	3.459	3.459	3.459	3.807	3.17	3.17	3.807	3.322	3.585	3.807	3.907	3.7	3.807	3.7	3.907	3.7	3.907	3.907	3.7	3.907	3.807	0.689489	0.119692	0.0538458	0.0312844	0.0241539	0.909522	0.0695335	0.590575	0.191406	0.875342	0.305154	0.256642	0.28567
Cyr61	10.46	9.896	10.21	10.16	9.763	10.53	10.47	10.24	10.12	10.84	10.45	10.63	10.12	10.96	9.773	10.16	9.605	10.19	10.83	9.549	11.32	10.13	11.63	10.99	9.504	10.43	11.19	10.69	10.28	9.533	10.69	10.37	10.7	10.84	10.1	10.17	0.32249	0.903271	0.267973	0.111201	0.36618	0.475774	0.0708401	0.578317	0.200404	0.637068	0.953958	0.543348	0.485843
Ccr7	7.644	7.665	8.209	7.418	7.931	8.098	7.827	8.308	8.728	8.447	9.014	8.061	7.721	7.392	7.954	7.852	7	7.384	8	7.845	8.527	7.304	8.98	8.711	7.913	8.313	8.371	7.87	8.64	8.028	8.011	7.468	7.34	7.781	7.508	7.401	0.0191715	0.239298	0.000890052	0.868113	0.00897229	0.0134859	0.0716792	0.270916	0.463005	0.241471	0.454546	0.0823812	0.985995
Crip1	11.42	11.61	11.77	12.05	11.84	11.76	11.82	12.54	12.21	12.22	12.33	11.75	12.28	12.16	12.63	12.45	12.27	12.42	11.58	12.29	11.83	11.26	12.15	11.91	11.55	11.98	11.89	12.21	11.85	11.51	12.19	12.08	12.23	12.21	12.55	12.1	0.0148191	0.000349739	0.163356	0.974715	0.0181242	0.0168126	0.0744084	0.293024	0.44374	0.224153	0.0171139	0.420713	0.997825
Ifnar1	9.351	9.557	9.642	9.496	9.418	9.466	9.484	9.587	9.594	9.562	9.629	9.478	9.472	9.322	8.858	9.451	9.478	9.596	9.585	9.629	9.66	9.649	9.726	9.866	9.424	9.424	9.526	9.496	9.541	9.611	9.371	9.539	9.568	9.382	9.209	9.424	0.487416	0.199735	0.0527455	0.0664243	0.00818609	0.364506	0.0749866	0.293279	0.445654	0.788025	0.402083	0.256392	0.372202
Cd99	9.058	8.353	8.775	7.721	8.384	8.371	8.622	6.87	6.833	7.721	7.16	8.728	7.492	7.229	7.82	7.022	7.331	8.093	9.031	6.629	8.248	8.948	7.644	8.224	9.006	7.592	7.994	7.679	8.253	9.098	8.209	7.285	7.658	7.693	8.317	7.459	0.0383352	0.0142316	0.668043	0.684223	0.343688	0.179765	0.078449	0.256909	0.511566	0.305848	0.103425	0.799908	0.985995
Gtf2h2	7.913	7.901	8.16	7.82	8.114	8.114	8.426	7.913	8.05	7.907	8.087	8.43	7.693	7.637	8.033	7.82	7.6	7.687	8.358	7.895	8.248	8.555	8.2	8.257	8.18	8.011	7.82	7.87	7.948	8.484	7.845	7.895	8.103	7.768	7.459	7.781	0.314742	0.0536339	0.00488451	0.131129	0.0016578	0.0681886	0.0784941	0.318436	0.427099	0.636333	0.200992	0.134694	0.523646
Il3	3.17	3.7	3	3.459	3.322	3.459	3.585	3	3.459	3.7	2.807	3.585	2.807	3.322	3.807	3.459	3.459	3.459	3.807	3.17	3.17	3.807	3.322	3.585	4.459	3.907	3.7	3.807	3.7	3.907	3.7	3.907	3.907	3.7	3.907	3.807	0.979618	0.841946	0.86196	0.0142376	0.048996	0.588417	0.0788399	0.201149	0.61322	0.990864	0.936184	0.911641	0.28567
Ido1	3.17	3.7	3	3.459	3.322	3.459	3.585	3	3.459	3.807	2.807	3.585	2.807	3.322	3.807	3.459	3.459	3.459	3.807	3.17	3.907	3.807	3.322	3.585	4.807	3.907	3.7	3.807	3.7	5	3.7	3.907	3.907	3.7	3.907	3.807	0.915701	0.871666	0.955569	0.011973	0.294031	0.119756	0.0798349	0.52721	0.250602	0.972684	0.948904	0.970108	0.28567
Ccl26	3.17	3.7	3	3.459	3.322	3.459	3.585	3	3.459	3.322	2.807	3.585	2.807	3.322	3.807	3.459	3.459	3.459	3.807	3.17	3.17	3.807	3.322	3.585	3.807	3.907	3.7	3.807	3.7	3.907	3.7	3.907	3.907	3.7	3.907	3.807	0.701228	0.824755	0.545927	0.0381412	0.0299044	0.913113	0.0807983	0.156955	0.725782	0.875342	0.928481	0.737956	0.28567
Ccl28	3.17	3.7	3	3.459	3.322	3.459	3.585	3	3.459	3.322	2.807	3.585	2.807	3.322	3.807	3.459	3.459	3.459	3.807	3.17	3.17	3.807	3.322	3.585	3.807	3.907	3.7	3.807	3.7	3.907	3.7	3.907	3.907	3.7	3.907	3.807	0.701228	0.824755	0.545927	0.0381412	0.0299044	0.913113	0.0807983	0.156955	0.725782	0.875342	0.928481	0.737956	0.28567
Cd70	3.17	3.7	3	3.459	3.322	3.459	3.585	3	3.459	3.322	2.807	3.585	2.807	3.322	3.807	3.459	3.459	3.459	3.807	3.17	3.17	3.807	3.322	3.585	3.807	3.907	3.7	3.807	3.7	3.907	3.7	3.907	3.907	3.7	3.907	3.807	0.701228	0.824755	0.545927	0.0381412	0.0299044	0.913113	0.0807983	0.156955	0.725782	0.875342	0.928481	0.737956	0.28567
Col10a1	3.17	3.7	3	3.459	3.322	3.459	3.585	3	3.459	3.322	2.807	3.585	2.807	3.322	3.807	3.459	3.459	3.459	3.807	3.17	3.17	3.807	3.322	3.585	3.807	3.907	3.7	3.807	3.7	3.907	3.7	3.907	3.907	3.7	3.907	3.807	0.701228	0.824755	0.545927	0.0381412	0.0299044	0.913113	0.0807983	0.156955	0.725782	0.875342	0.928481	0.737956	0.28567
Col11a1	3.17	3.7	3	3.459	3.322	3.459	3.585	3	3.459	3.322	2.807	3.585	2.807	3.322	3.807	3.459	3.459	3.459	3.807	3.17	3.17	3.807	3.322	3.585	3.807	3.907	3.7	3.807	3.7	3.907	3.7	3.907	3.907	3.7	3.907	3.807	0.701228	0.824755	0.545927	0.0381412	0.0299044	0.913113	0.0807983	0.156955	0.725782	0.875342	0.928481	0.737956	0.28567
Csf3	3.17	3.7	3	3.459	3.322	3.459	3.585	3	3.459	3.322	2.807	3.585	2.807	3.322	3.807	3.459	3.459	3.459	3.807	3.17	3.17	3.807	3.322	3.585	3.807	3.907	3.7	3.807	3.7	3.907	3.7	3.907	3.907	3.7	3.907	3.807	0.701228	0.824755	0.545927	0.0381412	0.0299044	0.913113	0.0807983	0.156955	0.725782	0.875342	0.928481	0.737956	0.28567
Epx	3.17	3.7	3	3.459	3.322	3.459	3.585	3	3.459	3.322	2.807	3.585	2.807	3.322	3.807	3.459	3.459	3.459	3.807	3.17	3.17	3.807	3.322	3.585	3.807	3.907	3.7	3.807	3.7	3.907	3.7	3.907	3.907	3.7	3.907	3.807	0.701228	0.824755	0.545927	0.0381412	0.0299044	0.913113	0.0807983	0.156955	0.725782	0.875342	0.928481	0.737956	0.28567
Il22	3.17	3.7	3	3.459	3.322	3.459	3.585	3	3.459	3.322	2.807	3.585	2.807	3.322	3.807	3.459	3.459	3.459	3.807	3.17	3.17	3.807	3.322	3.585	3.807	3.907	3.7	3.807	3.7	3.907	3.7	3.907	3.907	3.7	3.907	3.807	0.701228	0.824755	0.545927	0.0381412	0.0299044	0.913113	0.0807983	0.156955	0.725782	0.875342	0.928481	0.737956	0.28567
Il27	3.17	3.7	3	3.459	3.322	3.459	3.585	3	3.459	3.322	2.807	3.585	2.807	3.322	3.807	3.459	3.459	3.459	3.807	3.17	3.17	3.807	3.322	3.585	3.807	3.907	3.7	3.807	3.7	3.907	3.7	3.907	3.907	3.7	3.907	3.807	0.701228	0.824755	0.545927	0.0381412	0.0299044	0.913113	0.0807983	0.156955	0.725782	0.875342	0.928481	0.737956	0.28567
Il5	3.17	3.7	3	3.459	3.322	3.459	3.585	3	3.459	3.322	2.807	3.585	2.807	3.322	3.807	3.459	3.459	3.459	3.807	3.17	3.17	3.807	3.322	3.585	3.807	3.907	3.7	3.807	3.7	3.907	3.7	3.907	3.907	3.7	3.907	3.807	0.701228	0.824755	0.545927	0.0381412	0.0299044	0.913113	0.0807983	0.156955	0.725782	0.875342	0.928481	0.737956	0.28567
Mmp10	3.17	3.7	3	3.459	3.322	3.459	3.585	3	3.459	3.322	2.807	3.585	2.807	3.322	3.807	3.459	3.459	3.459	3.807	3.17	3.17	3.807	3.322	3.585	3.807	3.907	3.7	3.807	3.7	3.907	3.7	3.907	3.907	3.7	3.907	3.807	0.701228	0.824755	0.545927	0.0381412	0.0299044	0.913113	0.0807983	0.156955	0.725782	0.875342	0.928481	0.737956	0.28567
Nox3	3.17	3.7	3	3.459	3.322	3.459	3.585	3	3.459	3.322	2.807	3.585	2.807	3.322	3.807	3.459	3.459	3.459	3.807	3.17	3.17	3.807	3.322	3.585	3.807	3.907	3.7	3.807	3.7	3.907	3.7	3.907	3.907	3.7	3.907	3.807	0.701228	0.824755	0.545927	0.0381412	0.0299044	0.913113	0.0807983	0.156955	0.725782	0.875342	0.928481	0.737956	0.28567
Ptgds	3.17	3.7	3	3.459	3.322	3.459	3.585	3	3.459	3.322	2.807	3.585	2.807	3.322	3.807	3.459	3.459	3.459	3.807	3.17	3.17	3.807	3.322	3.585	3.807	3.907	3.7	3.807	3.7	3.907	3.7	3.907	3.907	3.7	3.907	3.807	0.701228	0.824755	0.545927	0.0381412	0.0299044	0.913113	0.0807983	0.156955	0.725782	0.875342	0.928481	0.737956	0.28567
Serpine3	3.17	3.7	3	3.459	3.322	3.459	3.585	3	3.459	3.322	2.807	3.585	2.807	3.322	3.807	3.459	3.459	3.459	3.807	3.17	3.17	3.807	3.322	3.585	3.807	3.907	3.7	3.807	3.7	3.907	3.7	3.907	3.907	3.7	3.907	3.807	0.701228	0.824755	0.545927	0.0381412	0.0299044	0.913113	0.0807983	0.156955	0.725782	0.875342	0.928481	0.737956	0.28567
Tnfrsf9	3.17	3.7	3	3.459	3.322	3.459	3.585	3	3.459	3.322	2.807	3.585	2.807	3.322	3.807	3.459	3.459	3.459	3.807	3.17	3.17	3.807	3.322	3.585	3.807	3.907	3.7	3.807	3.7	3.907	3.7	3.907	3.907	3.7	3.907	3.807	0.701228	0.824755	0.545927	0.0381412	0.0299044	0.913113	0.0807983	0.156955	0.725782	0.875342	0.928481	0.737956	0.28567
Zfp92	3.17	3.7	3	3.459	3.322	3.459	3.585	3	3.459	3.322	2.807	3.585	2.807	3.322	3.807	3.459	3.459	3.459	3.807	3.17	3.17	3.807	3.322	3.585	3.807	3.907	3.7	3.807	3.7	3.907	3.7	3.907	3.907	3.7	3.907	3.807	0.701228	0.824755	0.545927	0.0381412	0.0299044	0.913113	0.0807983	0.156955	0.725782	0.875342	0.928481	0.737956	0.28567
Runx2	6.508	6.807	6.585	5.17	5.907	5.907	5.672	3.459	4.7	5.426	4.907	6.15	4.755	5.585	3.807	4.755	5.615	5.728	6.728	4.524	5.672	6.833	5.426	5.807	6.066	5.672	5.555	5.358	6.022	6.209	6.267	5.907	5.492	6.022	3.907	5.358	0.0147417	0.013818	0.97856	0.966447	0.429844	0.45447	0.0823721	0.210695	0.609209	0.224153	0.103126	0.990707	0.997825
Trim9	3.17	3.7	3.17	3.459	3.322	3.459	3.585	3	3.459	3.322	2.807	3.585	4.524	3.322	3.807	3.459	3.459	3.459	3.807	3.17	3.17	3.807	3.322	3.585	3.807	3.907	3.7	3.807	3.7	3.907	3.7	3.907	3.907	3.7	3.907	3.807	0.599485	0.0849201	0.0276161	0.0542406	0.0437146	0.919697	0.0832371	0.821274	0.128499	0.860277	0.247347	0.213718	0.350705
Pbx1	10.01	10.01	10.01	10.02	9.889	9.75	9.917	9.574	9.591	9.635	9.803	9.718	9.78	9.833	9.142	9.864	9.685	9.836	9.838	9.7	9.95	9.752	9.847	9.786	9.823	9.735	9.959	9.94	9.887	9.672	9.922	9.748	9.527	9.767	9.609	9.831	0.0284603	0.01996	0.877776	0.822478	0.463571	0.340275	0.0841306	0.235921	0.56936	0.261123	0.12108	0.920837	0.985995
Camp	7.16	3.7	7.087	3.459	3.322	3.459	3.585	3	3.459	3.322	2.807	3.585	4.392	3.322	3.807	3.7	6.392	5.459	3.807	4.755	3.17	3.807	3.322	4.392	3.807	3.907	3.7	3.807	4.644	3.907	3.7	3.907	4.807	6.476	3.907	3.807	0.024573	0.756918	0.0488996	0.885371	0.355158	0.433662	0.086038	0.383197	0.381516	0.24457	0.912085	0.249844	0.989854
Nfkb1	9.313	9.047	9.32	9.42	9.039	9	9.306	9.364	9.464	9.527	9.504	9.29	9.43	9.306	9.195	9.492	9.405	9.342	9.271	9.572	9.269	8.948	9.464	9.457	9.103	9.375	9.234	9.401	9.222	9.382	9.205	9.459	9.617	9.447	9.577	9.229	0.0452903	0.112414	0.654826	0.678714	0.387758	0.20507	0.086459	0.596209	0.226266	0.316601	0.292596	0.794106	0.985995
Ltb	6.728	6.644	7.392	6.907	7.2	7.119	6.87	7.2	7.384	7.768	7.966	7.418	7.418	7.087	7.728	7.34	6.687	6.57	7.562	6.728	7.5	6.539	7.919	7.679	7.119	7.468	7.322	6.833	7.129	7.331	7.401	7.285	6.966	7.033	7.257	6.555	0.059747	0.535187	0.194458	0.592215	0.293895	0.602424	0.0874865	0.239788	0.575899	0.350835	0.741857	0.458947	0.98028
Nr4a2	7.238	7.833	7.741	7.304	7.229	7.409	7.476	7.375	7.384	7.129	7.741	7.7	7.358	7.229	3.807	6.931	7.267	7.524	8.472	7.748	7.794	7.931	8.52	7.562	6.768	6.34	7.022	7.011	8.098	6.977	7.16	7.492	6.919	8.721	7.728	6.943	0.982841	0.0574526	0.0549125	0.0190783	0.202176	0.251671	0.0877271	0.639408	0.0325895	0.992305	0.209078	0.260037	0.28567
Marcksl1	9.18	9.403	8.492	7.5	8.459	8.055	8.033	6.728	6.6	7.022	7.267	8.195	8.103	7.459	7.954	7.229	7.229	7.735	8.596	7.459	7.755	9.331	7.814	8.195	8.145	7.219	7.295	7.516	8.464	8.119	7.459	7.435	7.077	7.615	8.175	7.276	0.000783076	0.00955913	0.346492	0.229105	0.0429601	0.384249	0.0882292	0.649151	0.203097	0.0624883	0.0832813	0.621821	0.672653
Hes1	4.585	3.7	4.392	4.644	4.248	4.585	3.7	3.459	4.087	3.7	3.585	4.322	4.954	4	3.807	4.858	3.459	4.807	3.807	4.392	3.807	3.807	4.585	4.248	3.807	4.087	3.7	4.322	4.17	5.392	3.7	4.524	3.907	5.426	3.907	3.807	0.0558386	0.872522	0.0776924	0.62031	0.709542	0.901724	0.0884911	0.706378	0.178069	0.350078	0.948904	0.305129	0.98028
Ngf	3.17	3.7	3.322	3.459	3.322	3.459	3.7	3	3.459	3.322	2.807	3.585	3.585	3.322	3.807	3.459	3.459	3.459	3.807	3.17	3.17	3.807	3.322	3.585	3.807	3.907	3.7	3.807	3.7	3.907	3.7	3.907	3.907	4.954	3.907	3.807	0.586177	0.521405	0.239643	0.0619013	0.00260704	0.192286	0.0884942	0.0733452	0.925215	0.851988	0.728974	0.506911	0.369395
Ctla4	3.17	3.7	4.807	3.459	3.322	3.459	3.585	3	3.459	3.322	2.807	3.585	4.954	3.322	3.807	3.459	3.459	3.907	3.807	4	3.17	3.807	3.807	4.248	3.807	3.907	3.7	3.807	5.044	4.907	3.7	3.907	3.907	5.322	3.907	3.807	0.241395	0.587546	0.0912261	0.206359	0.351248	0.733166	0.0886712	0.780144	0.150107	0.582842	0.777043	0.331485	0.650074
Fcer1a	3.7	3.7	3.585	3.459	3.459	3.459	3.585	3	3.585	3.322	2.807	3.585	5.615	3.322	3.807	3.459	3.459	3.459	3.807	3.17	3.17	3.807	3.322	3.585	3.807	3.907	3.7	3.807	3.7	3.907	3.7	3.907	3.907	3.7	3.907	3.807	0.295651	0.2149	0.0263937	0.166759	0.146854	0.943098	0.0893301	0.876485	0.120424	0.621706	0.421756	0.213718	0.585651
Il12a	4	4.7	4	5.129	5.555	4.524	4	3	3.459	5	3.322	4.7	4.322	4.17	3.807	4.524	4.644	4.17	5.755	3.17	5.392	3.807	5.426	5.087	4.585	4.7	4.907	5	4.807	5.392	3.7	4.858	3.907	3.7	3.907	3.807	0.042316	0.285972	0.310646	0.720992	0.0298808	0.0129259	0.0896466	0.406972	0.0143284	0.310599	0.505234	0.585929	0.985995
Cd209e	3.17	3.7	3	3.459	3.322	3.459	3.585	3	3.459	3.322	2.807	3.585	4.322	3.322	3.807	3.459	3.459	3.459	3.807	3.17	3.17	3.807	3.322	3.585	3.807	3.907	3.7	3.807	3.7	3.907	3.7	3.907	3.907	3.7	3.907	3.807	0.712015	0.0785183	0.0359524	0.0455413	0.036204	0.916394	0.0924077	0.795676	0.150319	0.880695	0.236617	0.229301	0.315352
Rnase2a	3.17	3.7	3	3.459	3.322	3.459	3.585	3	3.459	3.322	2.807	3.585	4.322	3.322	3.807	3.459	3.459	3.459	3.807	3.17	3.17	3.807	3.322	3.585	3.807	3.907	3.7	3.807	3.7	3.907	3.7	3.907	3.907	3.7	3.907	3.807	0.712015	0.0785183	0.0359524	0.0455413	0.036204	0.916394	0.0924077	0.795676	0.150319	0.880695	0.236617	0.229301	0.315352
Il15ra	7.055	6.768	6.954	6.15	6.409	7.066	6.7	6.109	6.129	6.129	5.644	6.741	6.409	6.492	7.728	6.109	6.443	7	6.82	6.022	6.375	7.16	5.977	6.34	7.066	6.34	6.714	6.459	6.87	7.044	6.755	5.833	6.508	6.508	3.907	6.022	0.137413	0.909823	0.168317	0.359713	0.112351	0.0153456	0.0924784	0.290936	0.00843697	0.445676	0.95538	0.424293	0.828862
Trafd1	8.83	8.366	8.524	8.119	8.577	8.5	8.7	8.087	7.96	8.29	8.17	8.581	8.285	8.17	8.741	8.15	8.234	8.388	8.655	8.114	8.524	8.683	8.322	8.366	9.069	8.349	8.484	8.326	8.596	8.842	8.011	8.109	8.397	8.119	8.114	8.271	0.204398	0.284354	0.83751	0.258317	0.0682804	0.00472897	0.093314	0.576363	0.0285113	0.529866	0.505234	0.894807	0.737762
Cdc20	3.17	4.524	5.392	3.459	4.7	3.459	3.585	3.459	3.459	3.322	2.807	3.585	6.672	3.7	3.807	3.459	3.459	3.459	3.807	3.17	3.17	5.7	3.322	3.585	3.807	3.907	3.7	3.807	4.322	5.322	3.7	3.907	3.907	3.7	3.907	3.807	0.106292	0.956618	0.117848	0.439971	0.949007	0.47825	0.0936236	0.933307	0.110025	0.414999	0.971172	0.350022	0.914841
Gata6	7.925	7.983	8.243	8.755	8.285	8.185	8.326	8.928	8.814	8.98	8.983	8.535	8.861	8.877	8.15	8.974	8.651	8.535	8.524	8.704	8.88	7.943	9.033	8.788	8.443	9.137	8.771	9.19	8.508	8.435	8.748	9.066	8.937	8.794	8.957	9.003	0.00494646	0.0165562	0.627136	0.566316	0.131919	0.340928	0.0940227	0.491668	0.310553	0.134033	0.10948	0.784959	0.98028
Insig1	9.984	9.653	9.748	9.574	9.414	9.564	9.679	9.688	9.76	9.733	9.502	9.923	9.416	9.529	10.31	9.101	9.34	9.472	9.89	9.506	10.02	10.16	10.13	9.896	9.649	9.803	9.819	9.445	9.288	9.875	9.535	9.723	9.763	9.535	9.472	9.581	0.684431	0.371553	0.197404	0.0507114	0.0252061	0.752386	0.0940529	0.315373	0.48538	0.875342	0.593148	0.459982	0.335493
Sphk1	7.2	6.989	6.858	6.714	6.907	7.022	6.044	6.066	5.977	5.7	5.7	6.248	6.6	6.358	3.807	6.644	6.931	7.443	6.615	6.807	6.409	7.331	5.7	6.229	6.459	5.209	6.15	6.741	6.615	7.066	6.539	6.459	6.845	6.833	7.14	6.794	0.00771268	0.0712325	0.335283	0.687072	0.473361	0.266026	0.0944048	0.0762044	0.914068	0.17691	0.228579	0.614	0.985995
Col3a1	10.2	10.77	10.53	11.75	11.3	11.02	10.22	11.2	10.82	10.34	11.06	10.28	10.89	10.61	11.38	10.63	10.26	10.62	10.68	11.56	10.9	10	11.44	11.66	10.23	10.16	9.91	10.3	10.53	9.786	10.36	10.49	10.82	10.44	10.62	10.73	0.281986	0.4396	0.757265	0.0012876	0.0745297	0.101314	0.0945736	0.458511	0.338021	0.616005	0.653171	0.856445	0.184953
Hist2h2aa1	11.52	11.57	11.28	11.02	11.28	11.35	11.19	11.31	11.02	11.22	11.18	11.55	11.22	11.22	11.44	11.42	11.14	11.29	11.44	11.05	11.33	11.62	11.05	11.42	11.62	11.42	11.54	11.46	11.3	11.67	11.66	11.31	11.42	11.19	11.47	11.27	0.424951	0.672854	0.704941	0.11587	0.551103	0.318243	0.0961632	0.472309	0.331012	0.722023	0.84279	0.820154	0.493579
Fpr-rs5	3.17	3.7	3	3.459	3.322	3.459	3.585	3	3.459	3.322	2.807	3.585	4.392	3.322	3.807	3.459	3.459	3.459	3.807	3.17	3.17	3.807	3.322	3.585	3.807	3.907	3.7	3.807	3.7	3.907	3.7	3.907	3.907	3.7	3.907	3.807	0.717514	0.073023	0.0337419	0.0497624	0.0398352	0.91806	0.0988193	0.839205	0.144559	0.880695	0.229055	0.22113	0.335097
Adora3	3.17	3.7	3.907	3.459	3.322	3.459	3.585	3	3.459	3.322	2.807	3.585	5.087	3.322	3.807	3.459	3.459	3.459	3.807	3.585	3.17	3.807	3.322	3.585	3.807	3.907	3.7	3.807	3.7	3.907	3.7	3.907	3.907	3.7	3.907	3.807	0.291586	0.188945	0.0216703	0.195586	0.169061	0.932649	0.100203	0.963773	0.109329	0.621706	0.390896	0.206614	0.635207
Il25	3.17	3.7	3.17	3.459	3.322	3.459	3.585	3	3.459	3.322	2.807	3.585	4.7	3.322	3.807	3.459	3.459	3.459	3.807	3.17	3.17	3.807	3.322	3.585	3.807	3.907	3.7	3.807	3.7	3.907	3.7	3.907	3.907	3.7	3.907	3.807	0.620157	0.0741161	0.0253093	0.0684567	0.0561919	0.924214	0.101289	0.924439	0.121293	0.873695	0.230514	0.211103	0.372202
Nlrp3	9.342	8.814	8.492	6.741	7.508	7.721	6.687	5.977	5.907	5.977	6.066	7.098	7.721	7.276	3.807	6.755	7.524	7.366	7.209	7.098	6.989	8.531	7.331	7.807	6.768	6.304	6.508	6.267	8.439	6.895	6.755	7.257	5.833	8.011	7.313	6.794	0.00095554	0.010309	0.367718	0.215664	0.323797	0.795717	0.102507	0.23152	0.647566	0.0624883	0.0859862	0.636568	0.656465
Cd36	12.74	12.41	12.6	13.35	13.06	12.81	12.77	13.46	13.59	13.53	13.39	12.52	13.28	13.21	12.59	13.32	13.32	13.15	12.69	13.58	13.18	12.21	13.36	13.17	12.51	13.14	13.1	13.44	12.81	12.46	13.21	13.42	13.42	13.33	13.54	13.38	0.0814119	0.14525	0.761224	0.570207	0.107112	0.0327998	0.10311	0.907833	0.0821814	0.380907	0.34171	0.858948	0.98028
Csf1	8.87	8.145	8.714	8.781	8.577	8.527	8.405	8.2	8.224	8.781	8.596	8.366	8.919	8.728	8.504	8.814	8.913	8.855	8.721	8.551	8.418	8.124	8.858	8.741	8.464	8.644	8.974	8.91	8.945	8.405	8.175	8.629	8.768	8.484	8.629	8.768	0.220499	0.189057	0.014299	0.273522	0.962035	0.294328	0.104416	0.367019	0.0144771	0.552948	0.390896	0.198027	0.749016
Il27ra	3.459	3.7	3.322	3.7	4.755	3.807	4.322	3	3.459	3.7	3.322	4.392	3.7	3.585	3.807	3.459	3.459	3.459	3.807	3.17	3.585	3.807	3.322	4.459	4.392	5.044	3.7	3.807	4.17	3.907	3.7	3.907	3.907	3.7	3.907	3.807	0.707195	0.384855	0.619038	0.0558351	0.594261	0.157718	0.104423	0.323175	0.50892	0.880184	0.603597	0.78388	0.353302
Prg2	3.459	5.248	4	3.459	3.322	3.459	3.585	3	3.459	3.322	2.807	3.807	5.129	3.322	3.807	3.459	3.459	3.459	5.129	3.17	3.17	3.807	3.322	3.585	3.807	3.907	3.7	3.807	4.322	3.907	3.7	3.907	3.907	3.7	3.907	3.807	0.107801	0.862954	0.1485	0.48492	0.68055	0.772831	0.104774	0.679575	0.219356	0.414999	0.943977	0.393499	0.939132
H2-DMb2	7.651	7.907	8.15	8.134	8.195	8.224	8.129	8.257	9.098	9.036	9.572	8.531	8.276	7.937	9.993	8.615	7.839	7.839	8.257	8.109	8.459	7.109	8.972	8.895	7.895	8.683	8.326	8.335	8.459	8.214	7.983	8.129	7.839	7.508	7.919	8.366	0.0213836	0.223324	0.247253	0.951266	0.262168	0.237803	0.10511	0.101703	0.986332	0.241471	0.432506	0.514119	0.997368
Ifng	3.17	3.7	3	3.459	3.322	3.459	3.585	3	3.459	3.322	2.807	3.585	4.459	3.322	3.807	3.459	3.459	3.459	3.807	3.17	3.17	3.807	3.322	3.585	3.807	3.907	3.7	3.807	3.7	3.907	3.7	3.907	3.907	3.7	3.907	3.807	0.722877	0.0685442	0.0319886	0.054193	0.0436732	0.91968	0.105407	0.879861	0.139831	0.88167	0.225109	0.217955	0.350705
Csf2ra	10.59	10.79	10.05	8.093	9.48	9.15	9.295	7.531	7.087	8.388	7.883	9.709	8.238	8.262	7.392	7.728	8.098	8.83	9.916	7.966	9.192	10.83	8.738	9.478	9.638	8.388	8.516	8.219	9.901	9.669	8.516	7.827	7.977	8.738	8.539	8.19	0.00511298	0.00141093	0.627661	0.519441	0.0277841	0.107841	0.105505	0.405807	0.41625	0.134033	0.0323632	0.784959	0.962803
Cxcl10	5	6.109	4.644	4	5.129	4	4	3	3.459	3.7	3.907	4.248	4.755	3.807	3.807	4.392	3.459	4.7	5.7	3.322	4.392	6.492	5	4.248	5.087	4.322	3.7	4.17	6.066	5.044	3.7	3.907	3.907	4.858	3.907	3.807	0.0121122	0.118346	0.299014	0.758631	0.0483541	0.0909432	0.106256	0.753429	0.0565017	0.211675	0.305154	0.574545	0.985995
Pim2	7.209	7.033	7.508	7.401	7.109	7.248	6.966	7.687	7.954	7.476	7.858	7.285	8.2	7.304	7.864	7.459	7.562	7.748	7.295	7.82	7.248	7.19	7.426	7.418	7.077	7.219	7.7	7.109	7.607	7.16	7.585	7.285	7.451	7.807	7.508	7.443	0.0835937	0.0101523	0.35067	0.588961	0.483419	0.21863	0.108978	0.162054	0.829111	0.380907	0.0856528	0.624737	0.98028
Cttnbp2	4.087	3.7	4.392	4.644	4.755	4.248	4.459	4.087	3.459	4.807	4.954	4.459	3.907	4.248	3.807	4	5.129	4.858	5.358	4.907	4.807	5.7	5.555	4.807	5	4.907	4.907	4.644	4	3.907	5.524	4.644	4.807	3.7	3.907	3.807	0.825564	0.945814	0.878805	0.0438419	0.0126599	0.590526	0.110571	0.0642542	0.784584	0.942401	0.96735	0.920837	0.315352
Nfyc	8.124	8.082	8.527	8.629	8.379	8.615	8.248	8.833	8.883	8.883	9	8.527	8.647	8.658	9.299	8.683	8.765	8.775	8.426	8.778	8.679	7.913	8.781	8.57	7.864	8.574	8.794	8.864	8.451	8.308	8.725	8.83	9.05	8.676	8.693	8.785	0.0511067	0.0185357	0.652164	0.771181	0.115266	0.0648458	0.110698	0.546095	0.31048	0.334302	0.117207	0.793845	0.985995
Syk	7.839	7.392	8.129	7.443	7.19	7.728	7.516	8.082	8.405	8.484	8.516	7.839	7.937	7.827	8.88	8.093	8.669	8.353	7.637	8.066	7.57	6.443	8.098	8.637	7.375	7.637	7.524	7.375	8.392	7.531	7.418	8.119	8.011	8.618	8.651	8.281	0.0617666	0.0175608	0.573408	0.704418	0.110402	0.0513346	0.110898	0.546047	0.310957	0.351382	0.112083	0.756981	0.985995
Txndc16	6.833	7.033	6.883	7.562	7.366	7.098	7.276	8.011	8.093	8.017	8.317	7.011	7.852	7.592	7.82	8.028	7.547	7.18	6.943	7.615	7.451	6.672	8	7.6	7.109	8	7.707	7.845	7.516	7.033	7.476	7.443	7.331	7.459	7.644	7.762	0.00505628	0.0189038	0.594067	0.483842	0.529339	0.942702	0.113192	0.203114	0.743966	0.134033	0.117207	0.771758	0.939132
Mmp1a	3.17	3.7	3	3.459	3.322	3.459	3.585	3	3.459	3.322	2.807	3.585	4.585	3.322	3.807	3.459	3.459	3.459	3.807	3.17	3.17	3.807	3.322	3.585	3.807	3.907	3.7	3.807	3.7	3.907	3.7	3.907	3.907	3.7	3.907	3.807	0.733096	0.0617954	0.0294568	0.0635588	0.0518672	0.922758	0.118917	0.95298	0.13269	0.884879	0.213952	0.213718	0.372202
Map3k4	7.762	7.814	7.748	7.925	7.82	7.644	7.852	7.331	7.384	7.539	7.672	7.585	7.814	7.484	7.994	7.349	7.077	6.919	7.877	7.055	7.883	8.044	7.781	7.547	8.103	7.672	7.637	7.7	7.895	7.877	7.34	7.459	7.459	7.267	7.313	7.295	0.146164	0.028757	0.429008	0.447498	0.0303659	0.00476138	0.120114	0.986411	0.123998	0.454596	0.142629	0.693216	0.917496
Csf2	6.229	6.426	6.409	6.358	6.322	6.476	6.066	5.392	5.392	5.672	5.358	5.555	6.322	5.585	3.807	5.807	6.209	5.728	6.672	5.883	6.539	6.672	5.755	6.022	6.426	5.931	6.304	6.044	5.459	6.409	6.476	6.392	6.508	6.209	7.313	5.858	0.00811576	0.00839381	0.989253	0.570984	0.479238	0.206872	0.121228	0.01804	0.374097	0.180514	0.0822867	0.994939	0.98028
Col4a1	11.92	11.63	11.5	11.29	11.54	11.47	11.42	10.49	10.49	10.83	10.67	11.23	10.95	10.81	9.635	10.67	10.34	11.1	11.56	10.92	11.44	11.85	11.1	11.74	11.42	10.81	11.16	11.05	11.28	11.47	11.02	10.41	10.96	10.65	10.31	10.86	0.00186733	4.82e-05	0.200721	0.262076	0.00126512	0.022632	0.12129	0.417439	0.446749	0.0806247	0.00589253	0.464354	0.738094
Cxcr5	6.248	6.109	6.954	6.044	6.943	6.833	7.295	6.57	7.276	7.516	7.516	7.077	6.687	6.109	8.353	6.443	6.304	5.858	7.219	6.022	7.18	6.672	7.907	7.644	7.531	6.895	6.989	5.977	7.119	7.14	6.267	6.285	5.644	5.858	3.907	6.443	0.0808741	0.78684	0.135832	0.666737	0.00104877	0.00334529	0.123485	0.00991185	0.254276	0.380907	0.928481	0.377454	0.985995
Fpr-rs3	3.17	3.7	3	3.459	3.322	3.459	3.585	3	3.459	3.322	2.807	3.585	4.644	3.322	3.807	3.459	3.459	3.459	3.807	3.17	3.17	3.807	3.322	3.585	3.807	3.907	3.7	3.807	3.7	3.907	3.7	3.907	3.907	3.7	3.907	3.807	0.737894	0.0592483	0.0285486	0.0684016	0.0561431	0.924198	0.125709	0.985506	0.130012	0.884879	0.209078	0.213718	0.372202
Fpr-rs6	3.17	3.7	3	3.459	3.322	3.459	3.585	3	3.459	3.322	2.807	3.585	4.644	3.322	3.807	3.459	3.459	3.459	3.807	3.17	3.17	3.807	3.322	3.585	3.807	3.907	3.7	3.807	3.7	3.907	3.7	3.907	3.907	3.7	3.907	3.807	0.737894	0.0592483	0.0285486	0.0684016	0.0561431	0.924198	0.125709	0.985506	0.130012	0.884879	0.209078	0.213718	0.372202
Il2	3.17	3.7	3	3.459	3.322	3.459	3.585	3	3.459	3.322	2.807	3.585	4.644	3.322	3.807	3.459	3.459	3.459	3.807	3.17	3.17	3.807	3.322	3.585	3.807	3.907	3.7	3.807	3.7	3.907	3.7	3.907	3.907	3.7	3.907	3.807	0.737894	0.0592483	0.0285486	0.0684016	0.0561431	0.924198	0.125709	0.985506	0.130012	0.884879	0.209078	0.213718	0.372202
Saa1	3.17	3.7	3	3.459	3.322	3.459	3.585	3	3.459	3.322	2.807	3.585	4.644	3.322	3.807	3.459	3.459	3.459	3.807	3.17	3.17	3.807	3.322	3.585	3.807	3.907	3.7	3.807	3.7	3.907	3.7	3.907	3.907	3.7	3.907	3.807	0.737894	0.0592483	0.0285486	0.0684016	0.0561431	0.924198	0.125709	0.985506	0.130012	0.884879	0.209078	0.213718	0.372202
Traf1	8.877	8.562	8.672	8.366	8.697	8.308	8.574	7.852	8.033	8.19	8.243	8.633	8.295	8.375	7.2	8.551	8.19	8.05	9.082	8.17	8.714	8.577	8.607	8.718	8.842	8.488	8.422	8.827	8.82	8.827	8.43	8.349	8.349	8.061	8.492	8.114	0.0705045	0.0110784	0.414816	0.734331	0.056132	0.0266328	0.127383	0.616477	0.297296	0.361349	0.0893577	0.680076	0.985995
Ctnnb1	13.14	12.92	12.78	13	12.84	12.78	13.01	12.95	12.89	12.77	12.81	12.73	12.82	12.81	11.72	12.67	12.84	12.65	12.89	13.1	13.04	13.21	13.14	13.08	12.9	12.68	12.63	12.75	12.71	12.8	12.6	12.81	12.81	12.75	12.91	12.8	0.697838	0.0159299	0.038866	0.0140674	0.0266496	0.785672	0.128526	0.876251	0.0956076	0.875342	0.1075	0.229977	0.28567
Ets1	11.61	11.05	11.57	11.55	11.48	11.49	11.45	11.27	11.5	11.61	11.68	11.42	11.18	11.15	10.9	11.42	11.08	11.29	11.69	11.5	11.89	11.12	11.94	11.86	11.47	11.38	11.41	11.48	11.44	11.37	11.38	11.35	11.38	11.19	10.92	11.22	0.809309	0.025806	0.0146408	0.0587917	0.00155797	0.14334	0.129107	0.433425	0.450075	0.932548	0.137258	0.199007	0.362247
Rad51	3.17	3.7	3	3.459	3.322	3.459	3.585	3.17	3.459	3.322	3	3.585	2.807	3.807	3.807	3.459	3.459	3.459	3.807	3.17	3.17	3.807	3.322	3.585	3.807	3.907	3.7	3.807	3.7	3.907	3.7	3.907	3.907	3.7	3.907	3.807	0.990219	0.445357	0.452601	0.0344763	0.0268195	0.911273	0.130196	0.28163	0.649868	0.994272	0.65641	0.711841	0.28567
Fcer2a	3.17	3.7	3	3.459	3.459	3.459	3.585	3	4	4.459	5.322	3.585	3.322	3.322	3.807	3.585	3.459	3.459	5.044	3.17	3.17	3.807	5.248	4.585	4.755	4.755	3.7	3.807	3.7	3.907	3.7	3.907	3.907	3.7	3.907	3.807	0.0569114	0.708577	0.119785	0.832398	0.271915	0.37243	0.131524	0.298356	0.626988	0.350078	0.87411	0.351358	0.985995
Ccr8	3.585	4.585	4	3.459	3.322	3.459	3.907	3	3.459	3.322	2.807	3.585	5.644	3.322	3.807	3.459	3.459	4.459	3.807	3.585	3.17	3.807	3.459	4.248	3.807	3.907	3.7	3.807	4.087	3.907	3.7	3.907	3.907	3.7	3.907	3.807	0.15727	0.287516	0.0165564	0.484048	0.60002	0.859524	0.137163	0.698874	0.0644906	0.478988	0.506083	0.202605	0.939132
Znrf2	10.07	9.945	10.07	10.04	9.999	10.03	10.14	10.14	10.17	10.18	10.28	10.01	10.12	10.04	10.11	10.1	9.966	9.99	10.11	9.986	10.15	10.07	10.32	10.21	10.19	10.27	10.07	9.951	10.13	10.01	9.919	10.02	9.88	10.01	10.1	9.969	0.105356	0.710667	0.205457	0.627754	0.0473652	0.125541	0.13717	0.0945307	0.843916	0.414999	0.875218	0.470573	0.98028
Trem1	8.379	6.943	8.077	5.492	5.907	6.7	4.585	5.248	5	4.392	5	4.392	6.728	6	3.807	6.066	7.476	7.109	5.555	7.033	5.977	3.807	6.426	7.852	3.807	4.248	5.7	5.858	7.954	5.129	6.022	7.34	5.209	9.333	8.443	7.679	0.00399275	0.306592	0.0471653	0.347859	0.0850616	0.0102325	0.138108	0.0550651	0.641227	0.120966	0.526587	0.24906	0.81966
Tnfrsf1a	11.3	10.41	10.97	10.57	10.44	10.63	10.58	10.31	10.13	10.44	10.4	10.28	10.52	10.3	9.583	10.37	10.51	10.66	10.51	10.43	10.51	10.47	10.65	10.86	10.78	10.33	10.62	10.42	10.78	10.32	10.31	10.23	10.53	10.69	10.53	10.2	0.0260903	0.0159959	0.834306	0.848414	0.321845	0.421899	0.139898	0.284846	0.672831	0.251977	0.1075	0.894807	0.985995
Hras	9.786	9.451	9.537	9.733	9.624	9.527	9.637	9.602	9.568	9.543	9.414	9.492	9.637	9.562	9.635	9.726	9.524	9.377	9.611	9.468	9.647	9.498	9.562	9.403	9.587	9.512	9.796	9.674	9.646	9.62	9.447	9.551	9.494	9.558	9.543	9.285	0.417716	0.690104	0.678243	0.196447	0.529835	0.0594696	0.140015	0.870265	0.103113	0.717523	0.857083	0.806856	0.635207
Skil	10.01	9.803	9.833	9.502	9.613	9.671	9.864	9.94	10.16	9.845	9.932	9.842	9.537	9.488	8.88	9.392	9.371	9.547	9.655	9.873	10.05	9.828	10.08	10.09	9.699	9.685	9.964	9.738	10.15	9.917	10.06	9.776	9.806	10.07	9.932	9.478	0.128092	0.005091	6.96e-05	0.569871	0.542095	0.966697	0.140713	0.100384	0.00308678	0.435274	0.0633355	0.025542	0.98028
Cxcl11	3.17	4.907	3	3.459	3.907	3.459	3.585	3	3.459	3.807	2.807	4.248	4.644	3.322	3.807	3.459	3.459	4.392	3.807	3.17	3.17	3.807	3.322	3.585	3.807	3.907	3.7	3.807	3.7	5.044	5.392	3.907	3.907	5.044	3.907	3.807	0.608035	0.543433	0.266002	0.116334	0.0123177	0.306339	0.141477	0.158984	0.948216	0.860277	0.748368	0.540845	0.493579
Emp1	9.741	10.09	7.845	9.907	10.87	9.162	10.18	11.18	10.48	10.47	10.71	9.913	11.09	10.73	9.498	10.88	10.65	8.992	9.798	11.11	10.73	9.819	10.53	10.03	10.61	10.52	10.3	10.77	10.43	9.814	9.033	10.03	9.246	10.59	10.46	10.09	0.0276478	0.0760561	0.638446	0.85414	0.273364	0.202959	0.143191	0.0451995	0.563501	0.25688	0.23456	0.786274	0.985995
Ear6	3.17	3.7	3	3.459	3.322	3.459	3.585	3	3.459	3.322	2.807	3.585	4.807	3.322	3.807	3.459	3.459	3.459	3.807	3.17	3.17	3.807	3.322	3.585	3.807	3.907	3.7	3.807	3.7	3.907	3.7	3.907	3.907	3.7	3.907	3.807	0.751016	0.0537577	0.026732	0.0832302	0.0693806	0.928121	0.145823	0.930869	0.12437	0.890542	0.200992	0.213718	0.415018
Tnfrsf12a	8.34	8.358	8.771	8.29	8.17	8.426	7.989	8.895	9.053	8.768	8.957	8.451	8.989	9.498	8.788	8.64	8.48	8.922	7.852	9.119	8.353	8.061	9.2	8.833	7.679	8.371	8.94	8.633	8.655	7.931	9.292	9.187	9.664	9.52	8.974	8.679	0.221678	0.0437347	0.399652	0.397719	0.00942261	0.00100879	0.146711	0.642061	0.0591941	0.552948	0.175871	0.666201	0.866249
Tnc	8.344	9.101	8.011	8.362	7.937	8.295	7.913	7.322	7.524	6.943	7	7.679	7.547	7.672	8.253	7.16	7.358	7.418	8.577	8.14	7.913	9.177	7.901	8.508	7.276	6.443	6.966	6.524	7.322	7.17	7.435	7.257	7.877	7.768	7.983	7.827	0.00022119	0.00177687	0.455914	5.31e-07	0.00534184	0.00260508	0.148964	0.7678	0.0851646	0.0436356	0.0343216	0.712397	0.000389768
C1qa	8.322	8.798	8.679	8.447	8.476	8.57	8.637	8.397	8.257	8.175	8.622	8.262	8.738	8.468	9.635	8.472	8.129	8.077	8.512	8.48	8.267	8.388	8.248	8.285	8.592	8.492	8.562	8.585	8.88	8.17	8.379	8.317	8.43	8.418	8.714	8.175	0.343023	0.818055	0.241104	0.268989	0.797665	0.392694	0.149735	0.985129	0.154818	0.667848	0.928481	0.508536	0.746308
Rasal1	3.459	5	4.907	3.459	3.322	4.585	4.322	3	3.459	4.644	3	3.907	4.7	3.322	3.807	3.459	4.644	3.459	5.209	3.17	3.17	3.807	3.322	3.807	5	3.907	3.7	3.807	3.7	4.907	5.672	3.907	3.907	3.7	3.907	3.807	0.318896	0.575506	0.658039	0.292684	0.315928	0.959603	0.150691	0.270867	0.727128	0.637068	0.769143	0.79441	0.781835
Txn1	11.75	11.71	11.65	12.13	11.86	11.82	12.04	12.29	12.18	12.09	12.28	11.93	12.13	12.09	11.98	12.26	12.25	11.91	11.73	12.33	11.87	11.38	11.98	12.05	11.8	12.01	11.88	12.2	12.01	11.71	11.64	12.2	12.15	12.28	12.34	12.23	0.0211487	0.0366451	0.808925	0.731248	0.0632196	0.124353	0.151371	0.857133	0.206842	0.241471	0.160104	0.884875	0.985995
Ccl12	5.248	6.044	5.644	5.977	6.044	5.644	5.209	4.392	3.907	4.087	4.459	5.672	5.392	5.728	3.807	5.392	5.615	4.392	6.672	4.585	5.833	6.358	5.781	5.883	6.615	5.931	5.17	5.931	5.858	3.907	5.524	5.358	5.7	5.807	3.907	6.358	0.00954289	0.0959985	0.304671	0.500072	0.331417	0.762982	0.15183	0.609725	0.347873	0.194569	0.268942	0.580854	0.946012
Pf4	8.195	8.262	7.555	7.637	7.839	7.547	7.622	7.19	6.794	7.375	6.833	8.229	6.794	6.943	8.589	7.229	7.748	7.87	7.954	7.219	7.672	8.745	7.358	7.257	7.775	7.492	7.637	7.864	7.468	8.447	7.637	7.055	7.748	8.262	7.644	7.693	0.0830597	0.273763	0.50401	0.77681	0.921534	0.702664	0.152049	0.478432	0.458603	0.380907	0.493716	0.737956	0.985995
Prdx1	6.845	6.883	6.426	6.845	6.57	6.459	7.098	6.858	6.895	6.943	7.066	6.794	7.34	7.011	7.392	7.022	7.16	6.409	6.768	7.15	6.755	7.276	7.2	6.443	7.238	7	7.295	6.585	6.672	6.304	6.931	6.931	6.895	7.476	7.409	6.977	0.122072	0.0313094	0.511274	0.629936	0.323283	0.146125	0.152131	0.383579	0.563521	0.429794	0.146808	0.737956	0.98028
Acod1	4.585	3.7	4.954	3.459	3.322	3.459	3.585	3	3.459	3.322	2.807	3.585	4.858	3.322	3.807	3.459	4.7	3.807	3.807	4.322	3.17	3.807	3.322	4.7	3.807	3.907	3.7	3.807	5.248	3.907	3.7	4.524	3.907	6.714	3.907	3.807	0.131659	0.844987	0.0907276	0.607353	0.163378	0.370795	0.15378	0.391069	0.558266	0.436398	0.936889	0.331314	0.98028
Flrt2	6.741	6.907	7.219	7.19	7.044	7.098	6.392	6.82	6.555	6.044	6.6	6.209	7.366	6.919	8.15	7.022	6.807	6.443	6.644	6.615	6.304	6.629	6.833	6.845	6.459	6.322	6.687	7.16	6.781	7.044	6.931	6.687	6.966	7.033	3.907	7.022	0.0855403	0.802747	0.0511736	0.774398	0.516227	0.351497	0.154307	0.525265	0.0436085	0.38353	0.928481	0.250748	0.985995
Btg2	11.57	11.23	11.59	11.09	11.12	11.53	11.12	11.14	10.96	11.08	11.2	11.3	10.71	10.85	9.961	10.81	10.63	10.87	11.55	11.19	11.67	11.45	12.04	11.67	10.93	10.89	11.13	11.11	11.4	10.84	10.89	11.14	10.85	11.81	11.23	10.86	0.167631	7.11e-05	0.00352347	0.00151187	0.00574044	0.613824	0.155066	0.265726	0.0143861	0.487205	0.0074556	0.13234	0.184953
Batf3	4.907	5	5.044	3.459	4.807	4.392	5.129	3.907	3.585	3.807	2.807	4.807	4.755	4.17	3.807	4.087	4.807	5.044	5.426	3.807	4.459	3.807	3.322	5.209	5.087	4.954	4.755	3.807	4.392	3.907	5.392	3.907	4.755	4.858	3.907	3.807	0.109024	0.667173	0.233382	0.689578	0.784708	0.899281	0.156589	0.619305	0.349668	0.414999	0.839975	0.502353	0.985995
Il18	7.313	7.267	7.5	7.267	7.468	7.358	7.285	7.919	7.852	7.741	8.17	7.392	7.672	7.459	7.907	7.547	7.508	7.492	7.295	8.039	7.267	7.011	7.547	7.748	7.044	7.852	7.755	7.644	7.267	7.426	7.295	7.547	7.066	7.6	7.883	7.954	0.0413725	0.179291	0.457138	0.937704	0.672995	0.730729	0.157524	0.507812	0.442448	0.307317	0.380345	0.712397	0.993829
Il4i1	3.17	3.7	4	3.459	3.322	3.459	4	3	3.459	3.322	3.322	3.7	5	3.322	3.807	3.459	4.907	3.459	3.807	3.322	4	3.807	3.322	4.322	4.755	4	3.7	3.807	4.322	4.807	3.7	3.907	3.907	3.7	3.907	3.807	0.842234	0.0723133	0.0477039	0.0755174	0.821515	0.117302	0.159328	0.257246	0.0142023	0.945592	0.228579	0.249844	0.393119
C1qb	8.997	9.122	8.992	8.983	9.063	9.006	9.087	8.842	8.758	8.626	9.053	8.814	8.954	8.804	9.842	8.735	8.7	8.43	9.014	8.963	8.728	8.531	8.697	8.864	8.997	8.794	8.867	8.986	9.433	8.551	8.762	8.618	8.721	8.585	8.693	8.516	0.280909	0.441795	0.752538	0.360748	0.321752	0.0620779	0.162086	0.873135	0.121208	0.616005	0.654568	0.853729	0.828862
Hif1a	10.03	9.907	10.17	10.07	9.847	10.08	9.931	10.34	10.37	10.17	10.23	9.82	10.22	10.18	10.07	10.18	10.33	10.43	9.838	10.41	10.06	9.819	10.19	10.35	9.566	10.09	10.14	10.09	10.28	9.747	10.03	10.3	10.24	10.33	10.52	10.3	0.322874	0.0928907	0.471782	0.324765	0.172141	0.0225843	0.16612	0.813936	0.246756	0.637068	0.262238	0.718545	0.805331
Il18r1	9.743	9.731	9.961	10.13	9.926	9.574	9.812	9.938	9.996	9.925	10.17	10.14	9.596	9.803	7.392	9.672	9.635	9.594	9.943	10.29	10.23	9.551	10.42	10.33	9.433	9.678	9.964	10.1	9.776	9.828	9.88	9.873	10.04	9.688	9.905	9.884	0.531454	0.0263333	0.00573718	0.179955	0.30989	0.736731	0.166245	0.365672	0.0260472	0.816259	0.138062	0.138087	0.601536
H2-M3	7.392	7.883	7.57	7.14	7.562	7.426	7.741	6.492	6.954	7.2	6.781	7.7	6.858	6.943	7.331	6.82	6.781	6.966	7.679	6.954	7.349	7.82	7.257	7.418	8.028	7.451	7.755	7.34	7.607	8.093	6.931	6.644	7.033	6.768	3.907	6.977	0.289773	0.103858	0.554161	0.364989	0.00328184	0.000267932	0.167923	0.295207	0.0188309	0.621706	0.28029	0.741447	0.82998
Ptx3	3.17	3.7	4.087	3.459	3.322	3.459	3.585	3	3.459	3.322	2.807	3.585	4.755	3.322	3.807	3.459	3.459	3.459	3.807	3.17	3.322	3.807	3.907	3.585	3.807	3.907	3.7	3.807	3.7	3.907	3.7	3.907	3.907	5.17	3.907	3.807	0.292547	0.434588	0.0719207	0.367161	0.0454249	0.251601	0.170103	0.368108	0.627013	0.621706	0.648349	0.299942	0.82998
Rgl1	8.262	7.919	7.907	8.257	8.055	7.901	8.14	7.304	7.516	7.852	7.937	7.833	8.022	7.57	7.2	7.827	7.087	7.679	8.238	7.313	8.43	8.281	8.295	8.219	8.472	7.889	8.205	8.103	8.195	8.195	7.858	7.7	7.748	7.693	7.358	7.629	0.0990995	0.00702809	0.245567	0.781519	0.0095737	0.00474305	0.171462	0.930384	0.199231	0.399665	0.075862	0.512063	0.985995
C5ar1	9.786	8.873	9.441	8.931	8.919	8.647	8.044	8.735	8.414	8.145	8.626	8.331	9.52	8.966	7.82	9.459	9.713	9.301	8.071	9.09	8.504	7.304	8.877	9.326	7.762	8.267	8.618	8.725	9.697	7.889	8.243	9.443	8.512	10.27	9.889	9.6	0.0471495	0.930927	0.0390582	0.918823	0.0283598	0.0224455	0.174903	0.128089	0.862336	0.320442	0.966479	0.229977	0.991635
Dpp4	9.656	9.414	9.628	9.447	9.472	9.422	9.441	9.351	9.364	9.414	9.428	9.48	9.207	9.36	8.615	9.271	9.231	9.414	9.679	9.472	9.847	9.992	9.881	9.861	9.579	9.264	9.369	9.439	9.36	9.845	9.504	9.424	9.492	9.212	9.496	9.609	0.413763	0.00732806	0.050037	0.00929798	0.00599703	0.861669	0.179476	0.955402	0.197499	0.712915	0.0779536	0.249844	0.28567
Lamb3	5.907	6.919	7.119	8.931	8.257	7.34	6.883	9.082	8.892	8.496	8.817	7.044	8.861	8.676	7.2	9.304	8.827	8.748	6.794	8.791	8.017	6.358	8.439	8.055	6.358	8.285	7.937	8.693	7.435	7.066	8.409	8.91	8.592	8.644	9.264	8.644	0.100057	0.0157187	0.397192	0.809595	0.0395289	0.022955	0.180412	0.776352	0.286913	0.401322	0.1075	0.664098	0.985995
Vamp2	10.07	10.8	9.856	9.055	9.934	9.577	9.87	8.5	8.543	9.182	8.817	10.16	8.738	8.957	9.331	8.589	9.114	9.306	10.3	8.472	9.529	11.36	9.09	9.42	10.08	9.165	9.591	9.195	9.526	10.31	9.47	8.842	9.058	9.192	9.103	9.17	0.0489146	0.0157594	0.618272	0.88365	0.115359	0.151031	0.188549	0.514532	0.498579	0.329388	0.1075	0.78388	0.989854
Pros1	8.655	8.6	8.611	9.622	9.109	8.748	9	9.75	9.681	9.647	9.555	8.516	9.47	9.555	8.219	9.557	9.443	9.165	8.814	9.488	9.152	8.267	9.615	9.192	8.823	9.439	9.42	9.42	8.88	8.524	9.167	9.697	9.516	9.439	9.757	9.392	0.0693798	0.176169	0.623303	0.988327	0.111818	0.108749	0.18994	0.85969	0.138999	0.361349	0.379202	0.784959	0.997849
Vasp	11.2	10.8	10.98	10.3	10.58	10.43	10.41	9.963	10.02	10.1	10.12	10.55	10.26	10.08	9.484	10.08	10.07	10.25	10.53	10.21	10.66	10.78	10.54	10.8	10.64	10.16	10.1	10.17	10.65	10.38	10.29	10.15	10.28	10.46	10.28	10.12	0.00166397	9.37e-05	0.309924	0.128563	0.0408499	0.571729	0.19416	0.108388	0.746876	0.0763347	0.00764458	0.585929	0.523646
Rbp1	3.17	3.7	3	3.459	3.322	3.459	3.585	3	3.459	3.322	2.807	3.585	4	3.322	3.807	3.459	3.459	3.459	3.807	3.17	3.17	3.807	3.322	3.585	3.807	3.907	3.7	3.807	3.7	3.907	5.459	3.907	3.907	3.7	3.907	3.807	0.778048	0.268022	0.167771	0.122073	0.00414289	0.143153	0.194865	0.174901	0.949856	0.908466	0.48695	0.424293	0.506225
Grn	9.716	9.42	9.468	9.928	9.626	9.589	9.518	9.57	9.49	9.502	9.877	9.551	9.786	9.681	9.699	9.719	9.306	9.64	9.34	9.459	9.613	9.047	9.633	9.472	9.409	9.679	9.665	9.73	9.646	9.433	9.355	9.418	9.533	9.285	9.674	9.418	0.720445	0.89982	0.62893	0.141516	0.858472	0.19367	0.195805	0.97041	0.208423	0.88167	0.953056	0.784959	0.545569
Nkg7	7.34	6.954	7.781	6.555	7.248	7.276	7.238	6.755	7.17	6.409	6.966	6.977	7.098	6.629	3.807	6.845	6.322	6.644	6.989	6.741	7.451	3.807	7.219	7.109	7.285	7.585	6.392	6.781	7.562	7.119	7.547	7.358	7.418	6.883	6.794	6.768	0.550006	0.0400141	0.134144	0.218164	0.21242	0.98716	0.197733	0.0217192	0.280268	0.83238	0.169771	0.377454	0.6575
Ccrl2	8.488	8.626	8.679	8.574	8.317	8.308	8.488	8.611	8.57	8.788	8.672	8.349	8.704	8.405	7.672	8.34	8.304	8.34	8.592	8.52	9.152	8.543	8.969	8.791	8.512	8.665	8.916	8.647	8.558	8.214	8.877	8.551	8.539	8.781	8.735	8.535	0.561639	0.148483	0.0469165	0.212146	0.512362	0.545738	0.197879	0.566922	0.0673941	0.833292	0.345988	0.24906	0.654891
Ifngr1	11.62	10.99	11.4	11.41	11.25	11.3	11.17	11.32	11.22	11.4	11.47	11.08	11.35	11.16	10.62	11.36	11.17	11.47	10.87	11.47	11.25	10.53	11.23	11.67	11.45	11.28	11.32	11.46	11.63	11.2	11.34	11.26	11.31	11.36	11.33	11.33	0.726174	0.345588	0.550078	0.142329	0.307474	0.643468	0.198359	0.168137	0.923562	0.88247	0.571525	0.739483	0.545569
S1pr1	11.2	10.16	10.79	10.26	10.56	10.81	10.6	10.14	10.26	9.895	10.04	10.27	10.27	10.12	8.922	10.26	10.24	10.75	10.23	10.35	10.54	10.48	10.21	10.68	10.54	9.887	10.05	10.24	10.94	10.62	10.94	10.29	10.54	10.54	10.39	10.42	0.0531327	0.0173542	0.619415	0.869087	0.626488	0.515529	0.201983	0.0416831	0.41851	0.339125	0.112071	0.78388	0.985995
Mapk13	7.972	7.629	7.392	6.781	6.672	7.426	7.585	6.845	7.033	6.644	6.629	7.392	7.313	7.087	7.119	6.954	6.687	6.728	7.295	7.022	6.322	7.484	6.6	6.644	7.401	7.098	7.109	6.539	7.022	6.741	6.539	6.919	6.57	7.033	7.358	6.794	0.171079	0.121032	0.848406	0.665767	0.902363	0.579619	0.203442	0.306613	0.796935	0.487205	0.307396	0.900105	0.985995
Rnase2b	3.585	4.524	5.209	3.459	3.322	3.459	3.7	3	3.459	3.322	2.807	3.585	6.066	3.322	3.807	3.459	4.7	3.459	3.807	3.17	3.17	6.304	3.322	3.585	4.392	3.907	4.907	3.807	3.7	3.907	3.7	3.907	3.907	5.17	3.907	3.807	0.181284	0.644756	0.0762974	0.642918	0.702257	0.934892	0.203816	0.955385	0.185339	0.500518	0.822252	0.305129	0.98028
Smad2	7.833	8.039	8.219	8.64	8.155	8.214	8.229	8.629	8.687	8.611	8.665	8.077	8.697	8.69	8.253	8.791	8.592	8.57	7.989	8.855	8.276	7.615	8.615	8.459	7.748	8.539	8.581	8.622	8.384	7.707	8.622	9	8.925	8.752	8.886	8.592	0.113323	0.0309651	0.533566	0.837726	0.0113456	0.00681165	0.20382	0.762967	0.119135	0.423269	0.146808	0.737956	0.985995
Ccl19	7.615	7.925	7.585	6.87	7.539	7.592	7.459	6.375	6.459	6.687	6.658	7.5	7.524	6.476	8.185	6.15	6.895	7.087	7.728	6.966	7.276	8.375	6.907	7.098	8.238	7	6.907	6.907	8.05	7.755	6.87	6.087	6.7	7.358	3.907	7	0.113602	0.260335	0.633798	0.837446	0.0132885	0.00801415	0.204048	0.304339	0.0256831	0.423269	0.483329	0.785018	0.985995
Ski	8.934	8.6	9.033	8.64	8.889	8.877	8.945	8.626	8.555	8.861	8.629	8.814	8.718	8.827	9.409	8.629	8.892	9.236	8.864	8.455	8.892	8.775	8.858	8.916	8.934	8.778	8.945	8.898	8.858	9.106	9.231	9.039	9.399	9.114	9.347	9.257	0.453375	0.309986	0.0828492	0.296647	0.000876603	0.0136462	0.207362	0.071101	0.565821	0.749498	0.526587	0.312531	0.784475
Ctsa	4.248	4.7	4.248	4.459	4.392	4.807	4.954	4.087	4.7	4.755	4.322	4.322	5.285	4	3.807	3.907	5.044	4.17	3.807	4.087	3.585	3.807	4.954	5.17	4.807	5.129	5.392	5	4.524	3.907	3.7	3.907	3.907	4.858	3.907	3.807	0.866239	0.706048	0.585904	0.0554413	0.437636	0.00918129	0.207759	0.776171	0.125701	0.945592	0.872457	0.767953	0.353302
Cpa3	4.858	4.524	3	3.459	3.322	4	4.392	3	4.17	3.322	2.807	3.585	2.807	3.322	3.807	3.459	3.459	3.459	3.807	3.807	3.17	3.807	4.17	4.248	3.807	5	3.7	3.907	4.087	3.907	3.7	3.907	3.907	5.087	3.907	3.807	0.304385	0.124766	0.597902	0.444666	0.475256	0.959288	0.207919	0.11387	0.73584	0.625821	0.312441	0.771786	0.916578
Csf1r	10.15	9.545	9.767	9.568	9.778	9.736	9.672	9.355	9.422	9.604	9.887	9.793	9.474	9.351	8.88	9.424	9.18	9.439	9.763	9.459	9.869	9.476	9.77	10.04	10.03	9.803	9.925	9.443	10.13	9.679	9.243	9.371	9.629	9.342	9.424	9.403	0.315566	0.00134403	0.0179526	0.431993	0.0190409	0.00261266	0.208483	0.465434	0.589553	0.636333	0.0322568	0.202605	0.90337
Ripk2	6.375	6.044	6.229	6.807	6.858	6.508	6.954	7.044	7.087	7.257	7.57	6.555	7.044	6.883	3.807	7.022	6.919	6.672	6.585	6.858	6.989	6.19	7.349	7.055	6.409	6.954	7.077	7	7.022	6.672	6.687	7.129	7.066	6.931	7.011	6.919	0.0706059	0.809401	0.0424562	0.956154	0.715385	0.756712	0.208536	0.668567	0.0959349	0.361349	0.928481	0.239714	0.997368
Adamts2	8.577	9.262	8.658	8.629	8.842	8.555	8.892	8.366	8.165	8.317	8.6	9.031	8.145	8.267	8.665	8.248	8.29	8.366	9.248	8.426	8.714	9.445	8.592	9.011	8.728	7.994	8.175	8.219	8.762	8.512	8.098	8.011	8.353	8.353	8.651	8.562	0.278231	0.0207238	0.192628	0.00643768	0.00263346	0.731131	0.208941	0.561744	0.491424	0.616005	0.124683	0.458707	0.28567
Tuba1a	11.18	11.37	11.34	11.88	11.55	11.07	11.21	11.95	11.74	11.67	11.78	11.48	11.79	11.84	10.18	11.87	11.57	11.32	11.4	12.01	11.7	10.8	11.95	11.33	11.23	11.51	11.3	11.73	11.46	11	11.66	11.94	11.8	11.92	11.99	11.55	0.284808	0.892686	0.348312	0.473582	0.21624	0.0556036	0.209069	0.431941	0.0458593	0.616664	0.949881	0.622046	0.939132
Hip1r	8.986	8.877	8.861	8.468	8.768	8.451	8.752	8.082	8.185	8.331	8.267	8.472	8.566	8.484	8.109	8.238	8.098	8.331	9.122	8.262	8.718	9.134	8.718	8.551	8.954	8.551	8.468	8.375	8.647	8.7	7.901	8.185	8	7.937	8.205	8.129	0.00923624	0.00418339	0.755591	0.340848	2.32e-05	0.000368778	0.211075	0.196456	0.0141685	0.194569	0.0548322	0.85587	0.817017
Gadd45b	8.516	8.224	8.589	9.098	8.762	8.476	8.285	8.814	8.516	8.886	8.791	8.29	8.886	8.82	8.071	9.175	8.755	9.087	8.972	9.152	9.053	7.877	9.433	8.82	8.017	8.574	8.524	9.047	8.366	8.484	8.379	8.951	8.904	8.852	9.18	9.157	0.94655	0.364946	0.331237	0.0709506	0.925354	0.0584703	0.21212	0.563905	0.495061	0.984561	0.589776	0.609343	0.381835
Ccl27a	6.022	6.17	6.629	5.459	5.833	6.044	6.087	5.322	5.248	5.728	5.585	5.883	5.931	5.524	3.807	5.17	5.285	5.358	6.229	5.426	5.492	6.833	5.524	5.977	6.267	5.858	6.209	5.672	6.109	6.57	6.304	5.883	5.358	5.17	3.907	6.19	0.246626	0.0139093	0.164432	0.541754	0.181117	0.0559353	0.213033	0.388615	0.694265	0.590371	0.103126	0.422003	0.98028
Lat	4.907	5.644	5.17	3.459	4.524	3.907	4.459	3.17	3.459	3.322	3.7	5.248	2.807	4	3.807	3.585	3.459	3.459	5.755	3.807	4.7	6.409	4.17	4.7	5.7	4.954	3.7	4.907	4.858	5.555	3.7	4.807	3.907	3.7	3.907	3.807	0.0912685	0.0121665	0.365718	0.956909	0.0257687	0.0227528	0.213324	0.822544	0.304448	0.394065	0.0940021	0.634602	0.997368
Cebpg	7.331	7.276	7.331	6.82	6.907	7.366	6.644	6.322	6.459	6.267	6.6	7.257	6.883	6.585	3.807	6.426	6.895	7.066	7.443	6.524	6.6	7.508	6.714	7.011	7.15	6.492	6.781	6.7	7.366	7.331	7.055	6.392	6.966	7.055	6.794	7.248	0.083928	0.00972085	0.340863	0.991887	0.882803	0.874788	0.21368	0.0750729	0.571734	0.380907	0.0832813	0.619291	0.997849
Calr	12.02	12	12.21	12.5	12	11.98	11.79	12.12	12.09	12.08	12.42	11.87	12.48	12.37	12.49	12.56	12.33	12.47	11.93	12.56	12.11	11.65	12.6	12.58	11.6	11.94	11.83	12.26	12.23	11.66	12.15	12.56	12.43	12.37	12.32	12.45	0.700494	0.0300105	0.0121432	0.0367424	0.339191	0.00353719	0.214233	0.364373	0.730794	0.875342	0.144919	0.1819	0.28567
Cma1	4.7	3.7	3.907	3.459	3.322	5	3.585	3.322	4.524	3.322	2.807	3.585	2.807	3.322	3.807	3.459	3.459	3.459	3.807	4.392	3.17	3.807	4.322	4.087	3.807	4.459	3.7	3.807	3.7	3.907	3.7	3.907	3.907	3.7	3.907	3.807	0.0631913	0.0190937	0.590052	0.894164	0.670246	0.769392	0.214533	0.159004	0.861584	0.351382	0.117207	0.770637	0.989854
Hc	10.07	9.721	10.45	10.41	10.08	9.806	9.669	10.61	10.68	9.98	10.46	9.649	10.44	10.55	7.864	10.17	10.13	10.17	10.22	11.17	10.44	9.063	10.59	10.8	9.338	10.14	10.27	10.38	9.738	9.36	9.919	10.52	10.48	10.25	10.46	10.24	0.802118	0.552839	0.400265	0.140463	0.83908	0.200566	0.221254	0.781743	0.136626	0.929429	0.755649	0.666201	0.545569
Mmp9	9.819	8.589	9.09	7.814	7.907	7.665	6.672	6.845	6.459	6.426	6.907	6.794	8.983	8.185	7.516	8.585	8.972	8.43	6.7	7.989	7.794	7.801	8.637	8.951	6.129	6.19	6.459	7.313	8.98	6.459	7.687	8.977	7.7	9.644	9.589	9.103	0.000158102	0.933064	0.000201048	0.0169348	0.0640165	0.000101716	0.221312	0.166289	0.866721	0.0436356	0.967211	0.0368923	0.28567
Nfatc1	8.295	7.728	8.209	7.615	7.707	8.05	7.937	7.459	7.547	7.539	7.707	8.006	7.82	7.807	7.994	7.658	7.637	7.788	7.728	7.814	7.972	7.877	7.814	8.313	7.972	7.672	7.845	7.622	8.205	8.219	7.547	7.877	7.972	8	7.807	7.913	0.0935378	0.277745	0.536721	0.983488	0.625217	0.610722	0.225059	0.668598	0.426706	0.395374	0.49664	0.737956	0.997849
Anxa4	9.451	9.785	9.987	10.6	10.14	10.01	9.748	10.75	10.69	10.44	10.48	9.884	10.53	10.58	9.972	10.82	10.47	10.41	9.801	10.78	10.24	9.006	10.44	10.22	9.301	10.27	10.27	10.57	9.896	9.697	10.36	10.69	10.62	10.44	10.96	10.67	0.169034	0.0590593	0.585711	0.738575	0.0303011	0.0138872	0.226544	0.828172	0.156292	0.487205	0.209078	0.767953	0.985995
Enpep	8.655	8.945	9.209	9.815	9.572	8.895	8.833	10.23	9.997	9.688	9.929	8.745	10.09	9.999	8.69	10.04	10.08	9.579	8.827	10.41	9.685	8.439	9.94	9.725	8.683	9.841	9.572	9.994	9.145	8.895	9.508	10.07	9.864	9.811	10.14	9.872	0.217586	0.0769851	0.572773	0.632037	0.235857	0.100471	0.227213	0.664302	0.433472	0.549228	0.236161	0.756981	0.98028
Il1r2	9.311	7.658	8.937	6.57	7.055	7.87	4.248	6.358	5.129	4.524	4.755	4.7	8.647	7.109	7.907	8.358	9.574	9.085	6	8.637	6.267	6.629	6.508	9.061	3.807	3.907	3.7	6.248	9.371	5.954	7.418	8.409	6.459	10.57	9.794	8.913	0.000297245	0.45698	3.46e-05	0.0267487	0.0609136	0.000166875	0.227877	0.406363	0.700526	0.0436356	0.665522	0.0253674	0.28567
Rnd3	6.644	6.728	7.022	7.066	6.539	6.907	6.768	7.401	7.375	7.484	7.295	7.209	6.82	6.895	8.071	6.7	6.755	7.14	6.82	7.257	6.989	5.7	7.426	7.15	6.409	7.229	7.426	7.229	6.907	6.34	7.18	7.484	6.977	7.219	7.2	7.022	0.0702949	0.300714	0.41779	0.888585	0.22367	0.279668	0.229747	0.894521	0.183967	0.361349	0.520575	0.68234	0.989854
Ikzf1	7.989	7.658	8.248	7.637	8.033	8.071	8.006	8.028	8.119	8.219	8.504	8.114	7.845	7.948	8.718	8.028	8.234	8.039	7.937	7.895	8.248	7.615	8.464	8.721	8.15	8.308	7.925	7.877	8.392	7.96	8.039	7.954	7.901	8.082	8.082	8.19	0.159258	0.219743	0.850915	0.777267	0.505944	0.700974	0.231087	0.183101	0.889535	0.482121	0.426697	0.901258	0.985995
Ifna1	3.459	4.7	6.409	3.459	4.392	3.807	3.585	3	3.459	3.322	2.807	3.585	7.665	3.322	3.807	3.459	3.459	3.459	3.807	3.17	3.17	7.459	3.322	4.17	3.807	3.907	3.7	3.807	4.524	5.931	3.7	3.907	3.907	6.392	3.907	3.807	0.123715	0.798126	0.195156	0.888517	0.899255	0.989162	0.232166	0.786908	0.351566	0.429794	0.928481	0.459117	0.989854
Ndc80	3.17	3.7	3.907	3.459	3.459	3.459	4.248	3.17	3.459	3.322	2.807	3.907	2.807	3.322	3.807	3.459	3.459	3.459	3.807	3.17	3.17	3.807	3.322	3.585	3.807	4.248	3.7	3.807	3.7	3.907	5.615	3.907	3.907	4.858	3.907	3.807	0.872246	0.57557	0.689215	0.130452	0.00157199	0.0658721	0.234297	0.00771312	0.112471	0.947722	0.769143	0.810712	0.523646
Hmgb1	9.752	9.692	9.817	10.32	9.926	9.969	9.853	10.45	10.49	10.34	10.36	9.711	10.56	10.25	9.555	10.26	10.17	10.12	9.646	10.32	10.06	9.414	10.37	10.05	9.801	10.23	10.13	10.07	9.872	9.803	10.11	10.36	10.15	10.12	10.29	10.25	0.0909608	0.156388	0.772524	0.963277	0.161757	0.175359	0.239067	0.989271	0.244299	0.394065	0.354286	0.864497	0.997368
Irf3	9.555	9.276	9.32	9.155	9.192	9.276	9.231	8.907	9.15	9.202	9.058	9.324	9.111	9.053	8.945	9.039	8.839	8.864	9.344	8.886	9.466	9.25	9.329	9.32	9.217	9.155	9.377	9.285	9.271	9.338	9.122	8.98	9.071	9.095	8.957	9.09	0.118863	0.00175132	0.0790821	0.932561	0.0298261	0.0245935	0.241431	0.425128	0.702249	0.429782	0.0343216	0.307123	0.993829
B4galt4	10.2	9.574	9.908	10.14	10.05	10.23	9.738	9.831	9.836	9.656	9.592	9.351	9.913	9.78	8.504	10.06	9.872	9.944	9.494	10.2	9.804	9.622	9.74	9.618	9.788	9.412	9.362	9.963	9.957	9.721	10.01	9.748	9.786	9.817	9.726	9.604	0.0628835	0.0715537	0.949848	0.802153	0.84609	0.65693	0.245052	0.155044	0.787217	0.351382	0.228579	0.965635	0.985995
Amica1	8.551	7.954	8.758	7.665	7.679	7.762	6.907	7.19	6.629	6.358	6.858	6.845	8.276	7.814	3.807	8.093	8.804	8.155	6.919	8.229	6.858	7.276	7.615	8.435	6.895	6.768	6.248	7.119	8.861	6.931	7.858	8.439	7.615	9.262	8.992	8.823	0.0176993	0.267546	0.179251	0.413708	0.0711971	0.0111555	0.245409	0.0420995	0.3571	0.236742	0.48695	0.436881	0.884094
Cybb	9.055	8.6	8.989	8.842	8.775	8.488	9.079	9.733	9.748	9.579	9.997	9.14	9.145	8.977	8.322	9.122	9.34	9.51	9.285	9.539	8.687	6.794	9.32	9.422	8.295	9.804	9.649	8.721	9.238	8.665	8.589	9.234	9.409	8.512	9.008	8.679	0.024657	0.391597	0.146043	0.494972	0.842695	0.627294	0.246875	0.639663	0.484711	0.24457	0.610748	0.391852	0.945704
Elovl6	7.276	6.615	6.443	5.087	5.781	6.304	6.304	5.358	5.755	4.524	4.644	5.555	6.15	7.219	9.498	4.7	5.209	5.044	6.304	6.229	5.585	7.409	5.833	5.129	6.687	7.129	5.524	5.285	5.833	5.555	6.585	5.248	5.781	6.109	3.907	3.807	0.079358	0.916197	0.0640538	0.873279	0.0976724	0.132077	0.251502	0.20923	0.0199972	0.380907	0.957076	0.28153	0.987653
Fosl1	4	4.858	4.954	3.459	3.459	3.459	4.322	3	3.459	3.322	2.807	3.585	4.755	3.7	3.807	3.459	3.459	3.907	3.807	3.17	3.17	5.931	3.322	3.585	3.807	3.907	3.7	3.807	3.7	3.907	3.7	4.524	4.807	4.954	3.907	3.807	0.0946508	0.610848	0.235645	0.94209	0.214812	0.190087	0.252128	0.217409	0.92727	0.395374	0.797798	0.502801	0.993829
Ptger2	6	5.555	6	6.443	5.781	6.022	5.555	6.129	5.615	5.426	6.17	5.392	6.615	6.34	3.807	6.358	6.358	6.687	5.907	6.409	5.644	3.807	5.585	6.19	5.644	6.087	6.248	6.248	6.17	5.644	5.907	6.109	5.858	6.19	3.907	5.615	0.538436	0.882087	0.446148	0.312395	0.985693	0.320856	0.252443	0.926529	0.217355	0.823358	0.949881	0.708816	0.79342
Areg	6.34	7.14	7.435	6.109	6.15	5.833	7.14	7.15	6.768	6.066	6.443	7.276	6.508	6.15	3.807	5.7	6.443	5.977	6.375	6.585	5.459	6.539	6.508	6.57	5.833	5.615	6.687	5.977	6.17	6.209	6.17	6.629	6.6	6.615	7.459	6.19	0.379928	0.039737	0.00476933	0.459189	0.435921	0.13386	0.254907	0.0462262	0.00284753	0.687971	0.169771	0.134694	0.932855
Vrk2	5	5.285	4.907	5.585	5.672	5.672	5.585	6.022	6.15	6.129	6.375	5.459	5.781	6.022	3.807	5.807	6.555	6.358	5.585	5.858	5.322	5.7	5.807	6.267	5.426	6.044	6.044	5.755	5.833	5.7	6.392	5.907	6.022	6.209	3.907	5.931	0.0866322	0.285963	0.499615	0.898004	0.933574	0.832514	0.255121	0.414508	0.741983	0.385382	0.505234	0.737956	0.989854
Vav2	8.849	8.679	9	8.704	8.558	8.607	8.547	8.468	8.484	8.785	8.662	8.807	8.388	8.384	8.285	8.349	8.248	8.633	8.88	8.6	8.937	8.913	8.931	8.827	8.577	8.447	8.687	8.508	8.611	8.622	8.69	8.492	8.679	8.384	8.205	8.679	0.296733	0.0014957	0.0216679	0.0111517	0.002898	0.598359	0.256485	0.861493	0.19252	0.621706	0.0329956	0.206614	0.28567
Cxcr4	8.384	8.05	8.755	8.281	8.331	8.64	7.801	7.994	8.124	8.414	8.82	7.87	8.375	8.358	7.392	8.388	8.472	8.43	7.864	8.082	8.331	7.219	8.531	8.977	7.977	8.34	8.262	8.313	8.855	7.931	7.972	8.322	8.243	8.577	8.516	8.669	0.277091	0.429567	0.761819	0.602792	0.320156	0.631494	0.257253	0.209839	0.900304	0.616005	0.644718	0.858948	0.98028
Nectin1	9.006	9.373	8.901	8.447	8.574	8.735	8.707	7.658	7.728	7.895	7.755	8.775	8.093	8.375	8.285	7.901	8.006	8.124	9.306	8.267	8.778	9.596	8.592	8.833	9.098	7.943	8.205	8.422	8.683	8.596	8.409	8.322	8.439	8.238	8.205	8.527	0.00132748	0.00231193	0.837136	0.0679927	0.0170346	0.533997	0.257469	0.578091	0.558601	0.0725976	0.0385672	0.894807	0.372202
Map3k14	6.087	6.229	5.209	5.129	5.907	5.858	6.044	5.644	5.7	5.615	6.285	6.15	5.931	5.644	3.807	5.492	5.129	5.555	6.087	5.728	5.672	6.066	6.476	6.358	5.907	5.858	6.044	5.426	5.615	6	5.858	5.524	5.755	5.954	6.943	5.672	0.521167	0.0779681	0.0190641	0.335208	0.667541	0.589581	0.258463	0.333818	0.0408355	0.807678	0.236617	0.202605	0.817017
Eif4ebp2	10.07	9.551	9.745	9.814	9.812	9.919	9.883	9.36	9.49	9.752	9.679	9.728	9.685	9.633	10.31	9.809	9.394	9.604	9.82	9.56	9.954	9.847	9.839	9.896	10.15	9.747	9.78	9.738	9.966	9.723	9.771	9.527	9.842	9.775	9.531	9.736	0.180109	0.526609	0.470525	0.802	0.330977	0.224012	0.259557	0.807741	0.17319	0.500518	0.733456	0.718545	0.985995
Mif	9.51	9.371	9.726	9.061	9.085	9.822	9.311	9.022	8.943	8.904	8.827	9.351	9.594	9.042	10.72	8.977	8.94	9.533	9.399	8.855	9.195	9.736	9.033	9.25	9.269	9.006	9.185	9.039	9.172	9.576	9.447	9.185	9.355	9.358	9.055	8.992	0.0821583	0.852819	0.0561709	0.859119	0.951317	0.907278	0.261665	0.86159	0.196743	0.380907	0.93898	0.262779	0.985995
C3ar1	7.443	8.145	7.033	6.476	6.714	7.129	7.285	6.209	6.087	6.285	6.267	7.044	6.966	6.17	3.807	6.129	5.728	5.858	7.901	5.555	6.714	8.577	6.409	7.087	7.622	6.954	7.098	6.6	7.044	7.109	6.807	6.17	6.755	6.248	7.011	6.6	0.133357	0.00188159	0.0736469	0.94043	0.285811	0.254309	0.261778	0.113046	0.629484	0.436982	0.0352475	0.30369	0.993829
Lamp3	10.32	10.7	11.07	11.69	11.11	10.93	10.51	12.28	12.15	11.52	11.96	10.75	11.96	11.84	8.219	11.91	11.96	11.71	10.74	12.39	11.21	9.451	11.61	11.83	9.996	11.47	11.44	11.55	10.79	10.59	11.18	12.07	12.02	11.65	12.28	11.97	0.263264	0.549606	0.596998	0.638562	0.190031	0.0792297	0.262535	0.607186	0.106772	0.611506	0.753634	0.771786	0.98028
Loxl2	6.87	7.322	7.426	7.637	7.033	7.592	6.508	7.16	7.358	6.977	7.087	6.629	7.755	7.248	8.109	7.267	6.741	7.644	7.238	7.592	6.87	7.19	7.295	7.229	6.209	6.82	6.585	6.644	7.077	5.931	7.943	7.209	7.82	7.577	7.358	7.109	0.0897409	0.479254	0.0192454	0.0020432	0.203819	5.45e-05	0.263664	0.683697	0.131262	0.394065	0.691105	0.202605	0.214244
Klf4	11.96	10.96	11.47	11.33	11.59	12.11	11.31	11.72	12.04	11.56	11.77	11.27	11.3	11.01	10.17	11.04	11.52	11.61	10.68	11.55	11.5	11.33	11.84	11.46	10.2	10.53	11.12	11.39	11.8	11.32	11.92	11.84	12.03	12.53	11.97	11.42	0.860497	0.0584416	0.0401133	0.166102	0.0238045	0.00063187	0.267963	0.00439506	0.000204449	0.945592	0.209078	0.230025	0.585651
Fpr-rs4	3.17	3.7	3.17	3.459	3.322	3.459	4.17	3	3.459	3.322	2.807	3.585	4.858	3.322	3.807	3.459	3.459	3.459	3.807	3.17	3.17	3.807	3.322	3.585	3.807	3.907	3.7	3.807	3.7	3.907	3.7	3.907	3.907	3.7	3.907	3.807	0.95829	0.0908775	0.100623	0.109658	0.0934257	0.933842	0.268389	0.992038	0.264222	0.985133	0.259549	0.343872	0.484872
Tyrobp	12.7	12.09	12.24	10.99	11.55	11.3	11.35	11.06	10.59	11.04	11.15	11.45	11.24	10.98	9.583	11.23	11.53	11.4	11.34	11.23	11.32	12.04	11.46	12.13	11.52	11.05	11.08	10.92	12.29	11.19	10.75	11.36	10.74	11.95	11.65	11.46	0.021317	0.00841494	0.700859	0.406234	0.363535	0.936609	0.272161	0.191389	0.829267	0.241471	0.0822867	0.820154	0.876987
Ltb4r1	5.459	5.248	5.555	4.585	4.644	4.807	4.524	4.755	4.392	4.7	4.858	5	5.209	4.392	3.807	5.17	5.322	5.492	5.129	4.392	4.524	3.807	4.7	5.248	4.807	5.17	5.17	4.954	4.807	3.907	5.672	5.833	5.248	3.7	3.907	3.807	0.297224	0.645754	0.55558	0.606727	0.852081	0.742125	0.272358	0.64788	0.516581	0.621706	0.822252	0.741447	0.98028
Itgb2	10.26	9.718	9.974	9.192	9.551	9.32	9.271	9.288	9.085	9.226	9.424	9.49	9.549	9.229	8.531	9.428	9.74	9.773	9.585	9.476	9.43	9.331	9.545	10.08	9.604	9.482	9.414	9.09	10.01	9.412	9.095	9.631	9.506	9.984	9.664	9.644	0.0585535	0.130492	0.684669	0.704577	0.946432	0.655549	0.272399	0.260541	0.977357	0.350078	0.321414	0.80817	0.985995
Jak3	9.558	8.794	9.079	8.271	8.858	8.589	9.274	7.794	7.728	8.422	8.418	9.205	8.055	8.039	7.728	7.931	8.134	8.295	9.111	8.18	8.785	9.533	8.281	8.849	9.468	8.468	8.543	8.439	8.925	8.931	8.14	7.913	8.313	8.05	7.983	8.077	0.129888	0.00211662	0.0827745	0.981336	0.00720844	0.00679475	0.272742	0.739558	0.440723	0.436398	0.0369904	0.312531	0.997849
Jun	10.56	9.907	10.09	11.35	10.76	10.78	10.57	11.28	11.32	11.4	11.43	10.33	10.92	10.91	9.609	11.28	10.9	10.94	10.12	10.94	11.04	9.873	11.45	10.71	10.25	11.1	10.97	11.38	10.62	10.07	10.98	11.1	11.13	11.15	10.99	10.78	0.0931219	0.509126	0.295595	0.878331	0.239334	0.303985	0.273211	0.709583	0.145882	0.395374	0.720035	0.570322	0.989854
Cd86	6.858	7.392	7.219	6.022	6.883	6.443	6.87	6.34	6.426	6.15	6.443	6.555	6.907	6.022	7.119	5.781	5.907	6.555	6.768	6.833	6.304	7.304	6.375	6.741	7.19	6.57	6.508	6.304	7.562	7.044	6.392	6.209	5.954	6.322	3.907	6.087	0.275465	0.177594	0.789595	0.64468	0.00553045	0.00163604	0.273682	0.266894	0.0319333	0.616005	0.380041	0.873755	0.98028
Xcr1	4	4.907	3.585	4	3.322	3.459	4.524	3.7	3.7	4.17	4	4.7	5.087	3.585	3.807	3.459	3.459	4.17	3.807	3.17	3.17	3.807	4.087	4.248	3.807	4.392	5.358	4.585	4.392	3.907	3.7	3.907	3.907	3.7	3.907	3.807	0.370778	0.86181	0.469299	0.0187056	0.705433	0.0440526	0.275134	0.885146	0.341907	0.68653	0.943977	0.718545	0.28567
H2-DMb1	8.335	8.64	8.16	8.87	9.05	8.679	8.704	8.551	8.794	8.765	8.804	8.401	8.755	8.313	8.109	8.547	8.055	7.901	8.531	8.607	8.839	7.781	9.124	8.644	9.082	8.883	9.134	8.898	8.913	8.539	8.175	8.335	7.858	8.14	8.317	8.214	0.78686	0.0581802	0.0323666	0.0751418	0.0235115	0.000190444	0.276098	0.771467	0.170865	0.915301	0.209078	0.217955	0.393119
Tlr3	6.409	6.57	6.687	6.781	6.672	6.322	6.304	6.895	6.858	6.858	6.459	6.57	7.087	6.629	7.044	6.781	6.714	6.895	7.087	6.57	6.644	7.011	6.989	6.931	6.687	6.833	6.82	6.954	6.615	6.644	7.2	6.714	7.087	6.714	7.2	6.883	0.51209	0.0313172	0.121805	0.377501	0.461104	0.110639	0.27886	0.294739	0.97123	0.805994	0.146808	0.353379	0.847357
Id2	11.19	11.34	11.11	11.09	11.05	11.02	11.36	11.22	10.99	11.22	11.17	11.43	11.13	11.07	9.796	10.91	10.76	10.72	11.52	11.25	11.44	11.66	11.46	11.42	11.51	11.39	11.39	11.16	11.22	11.33	10.62	11.05	10.91	10.79	10.87	10.95	0.498804	0.00863226	0.00146487	0.390957	0.000246364	0.00266774	0.280104	0.354443	0.87461	0.791054	0.0822867	0.0823812	0.861749
Serpinb6a	10.2	10.04	9.951	9.842	9.895	10.61	10.1	9.506	9.518	9.707	9.674	10.14	9.85	9.699	11.4	9.763	9.496	9.886	10.27	9.642	9.967	10.29	9.823	9.901	10.23	9.823	9.974	9.916	9.838	10.12	10	9.755	9.796	9.617	9.695	9.644	0.13199	0.719282	0.245411	0.994828	0.266108	0.263412	0.280515	0.590223	0.110477	0.436398	0.881391	0.512063	0.997849
Tnfrsf8	3.17	3.7	3	3.459	3.322	3.459	3.585	3	3.459	4.087	2.807	3.585	2.807	3.322	3.807	3.459	3.459	3.459	3.807	3.17	3.17	3.807	3.322	3.585	3.807	3.907	3.7	3.807	3.7	3.907	3.7	3.907	3.907	3.7	3.907	3.807	0.683317	0.840921	0.835517	0.0587135	0.0476151	0.921219	0.281573	0.19828	0.828423	0.875342	0.936184	0.894807	0.362247
Itgal	8.5	8.29	8.791	8.366	8.484	8.375	8.093	9.106	9.095	8.839	9.25	8.581	8.771	8.741	8.219	8.919	9.09	8.492	8.103	9.134	8.508	7.384	9.025	9.392	8.077	8.907	8.662	8.426	9.09	8.219	8.401	9.114	8.845	9.301	9.333	9.205	0.160269	0.349237	0.629107	0.913153	0.0867328	0.0696527	0.282003	0.567296	0.104252	0.482121	0.574754	0.784959	0.991501
Mertk	9.077	8.229	9.114	8.807	9.119	9.32	8.873	8.883	8.814	8.886	8.508	8.839	8.476	8.704	8.071	8.693	9.082	9.25	8.88	8.867	8.898	8.496	8.707	9.066	8.775	8.768	8.898	8.98	8.836	9.295	9.167	8.925	9.301	8.895	8.849	9.063	0.381477	0.16263	0.591625	0.516474	0.195439	0.509966	0.28326	0.0605531	0.399258	0.687971	0.361729	0.770969	0.959726
Adcyap1r1	3.322	4.7	4.644	3.459	3.322	3.807	4.248	3	3.459	3.322	2.807	4.954	3.807	3.322	3.807	3.459	3.459	3.7	3.807	3.17	3.17	5.781	3.322	4.17	4.585	4.17	3.7	3.807	4	5.129	3.7	3.907	3.907	4.954	3.907	3.807	0.517527	0.452883	0.916642	0.384879	0.735617	0.592646	0.285735	0.442185	0.76042	0.807452	0.664832	0.94364	0.856064
Ccl8	4.807	6.943	5.555	6.524	6.322	6.285	4.907	5.044	5.426	4.907	5.807	6.285	5.7	5.322	3.807	5.129	5.044	5.044	5.807	5.426	5.492	6.833	5.322	6.375	5.129	5.426	5.17	5.248	7.883	6.044	3.7	5.129	5.392	5.807	3.907	5.459	0.102411	0.0125297	0.341746	0.884018	0.0210351	0.029412	0.285983	0.877841	0.359238	0.408532	0.0957999	0.619361	0.989854
Atf3	8.644	8.18	8.527	7.7	7.833	8.901	8.295	7.492	7.845	8.055	7.972	8.596	7.585	8.017	8.109	7.349	7.358	7.285	8.384	7.418	8.969	8.867	9.453	8.195	7	7.468	8.371	7.755	8.566	7.781	7.889	7.592	7.954	9.229	7.954	7.34	0.41194	0.0338127	0.175159	0.0245223	0.0800058	0.584369	0.287542	0.773908	0.179861	0.711444	0.154036	0.432885	0.28567
Tlr1	6.15	5.285	6.209	5.585	6.17	5.977	6.15	6.17	6.304	6.845	6.931	6.714	6.066	5.209	7.622	5.858	4.807	4.807	6.755	5.17	6.304	5.7	6.87	6.977	7.044	6.7	6.459	6.022	5.858	6.109	5.392	5.129	5.555	5.044	3.907	5.615	0.095804	0.64693	0.036867	0.849717	0.00254886	0.00153204	0.288851	0.0553142	0.369255	0.395374	0.822252	0.229325	0.985995
Cd84	9.688	8.607	9.18	8.447	8.697	8.508	8.409	8.704	8.353	8.827	8.731	8.577	8.585	8.527	8.109	8.618	8.755	8.986	8.496	8.299	8.728	8.566	8.741	9.255	8.566	8.7	8.574	8.558	9.122	8.658	8.243	8.527	8.271	8.858	8.562	8.855	0.161749	0.156229	0.984395	0.930976	0.475627	0.424407	0.290599	0.60912	0.580576	0.484587	0.354286	0.994939	0.993829
Zmpste24	8.17	7.748	8.366	8.371	8.267	8.362	8.248	8.558	8.384	8.384	8.459	8	8.439	8.375	8.15	8.577	8.574	8.611	8	8.585	8.353	8.124	8.455	8.492	8.039	8.313	8.484	8.5	8.243	8.044	8.422	8.48	8.539	8.43	8.83	8.43	0.324257	0.0628734	0.361213	0.609418	0.14351	0.0523307	0.291403	0.764251	0.446754	0.638083	0.21565	0.632208	0.98028
Tap2	9.16	9.025	9.129	8.94	8.889	9.071	9.353	8.353	8.644	8.778	8.771	9.066	8.745	8.788	8.447	8.707	8.707	8.836	9.42	8.658	8.972	8.992	8.997	9.16	9.29	8.791	9.058	9.025	8.972	9.074	8.966	8.651	9.071	8.775	8.344	8.679	0.142498	0.0230163	0.382822	0.989516	0.0474142	0.0460931	0.291467	0.819007	0.406071	0.448072	0.129953	0.650443	0.997849
Cd151	9.43	9.276	9.633	10.51	10.14	9.956	9.574	10.49	10.46	10.43	10.45	9.671	10.54	10.48	10.28	10.76	10.52	10.53	9.535	10.55	10.15	9.031	10.35	10.1	9.671	10.22	9.996	10.54	9.914	9.486	10.41	10.5	10.54	10.49	10.57	10.3	0.120004	0.00379059	0.136789	0.934166	0.026875	0.0323926	0.292288	0.573984	0.618556	0.429794	0.051524	0.377454	0.993829
Ccnb2	4.17	4.858	5.087	4.755	4	5.087	3.907	4.087	4.459	3.585	4.17	4.644	4.755	4.644	3.807	3.459	3.459	4.524	3.807	4.858	4.755	3.807	4.087	4.907	5	3.907	3.7	4.807	4.392	3.907	3.7	5.087	3.907	3.7	3.907	3.807	0.0805121	0.0633639	0.906332	0.76964	0.228268	0.357767	0.293706	0.626308	0.568682	0.380907	0.216322	0.93829	0.985995
Crem	7.741	8.098	7.814	6.629	6.741	7.285	7.547	7.331	7.304	6.768	7.238	7.285	7.109	6.7	3.807	6.267	7.055	7	7.459	8.022	7.14	7.895	7.547	7.492	7.077	6.066	6.845	6.229	8.039	7.033	7.401	7.409	7.366	7.672	7.14	7	0.717325	0.00891082	0.021355	0.0712689	0.498002	0.246486	0.29655	0.147212	0.0159125	0.880695	0.0827917	0.206614	0.381835
Clec9a	5.954	6.977	6.555	5.644	5.954	5.833	6.358	5.833	5.426	5.644	6.044	6.17	5.931	5.807	3.807	5.209	6.022	6	6.34	5.672	6.129	5.781	5.672	6.109	6.229	5.907	6.426	6.322	6.248	6.375	3.7	5.833	6.267	5.392	3.907	5.858	0.510078	0.0647718	0.221522	0.410801	0.0357689	0.0048785	0.296938	0.844579	0.217526	0.805155	0.220104	0.484408	0.882997
Itga4	8.633	8.596	8.997	8.405	8.669	8.633	8.676	8.768	9.061	9.124	9.335	8.852	8.443	8.253	8.811	8.349	8.422	8.459	8.464	8.48	8.858	8.077	9.207	9.488	8.901	9.116	8.895	8.379	9.137	8.447	8.468	8.422	8.205	8.484	8.371	8.468	0.0840693	0.265787	0.00644928	0.777427	0.049525	0.0264957	0.297359	0.524879	0.679795	0.380907	0.486936	0.138087	0.985995
Sfrp4	3.17	3.7	3	3.459	3.322	4.248	4.087	3	4	3.322	2.807	3.585	5.285	3.322	3.807	3.459	3.459	3.459	3.807	3.17	3.17	3.807	3.322	3.585	3.807	4.087	3.7	3.807	3.7	3.907	3.7	3.907	3.907	3.7	3.907	3.807	0.948265	0.215916	0.193635	0.161685	0.177403	0.957757	0.297414	0.934704	0.336047	0.984561	0.422602	0.458707	0.584615
Ncf2	11.06	10.13	10.65	9.338	9.941	9.828	9.274	9.401	9.212	9.306	9.539	9.591	9.844	9.484	8.322	9.629	10.46	10.15	9.32	9.944	9.562	9.966	9.752	10.56	9.418	9.347	9.098	9.324	10.78	9.315	9.167	9.893	9.172	10.91	10.74	10.19	0.0190303	0.112107	0.408939	0.337596	0.608548	0.14585	0.297692	0.138086	0.646875	0.241471	0.292596	0.674643	0.817017
Ccl21a	11.11	11.44	11.29	11.69	11.31	10.88	11.21	11.51	11.36	11.54	11.38	11.46	11.32	11.3	11.87	11.32	11.43	10.95	11.15	11.35	11.45	11.23	11.18	11.12	10.96	11.38	11.38	11.51	10.99	10.75	11.26	11.27	11.61	11.09	11.49	11.28	0.383373	0.578453	0.749175	0.546726	0.538938	0.227603	0.299022	0.966578	0.280442	0.689696	0.77057	0.85123	0.98028
Tgm2	12.43	12.83	12.38	11.59	11.94	11.93	12.24	11.25	11.17	11.38	11.25	12.32	11.52	11.48	11.11	11.48	11.5	12.04	12.4	11.61	12.14	13.01	11.67	11.87	12.45	11.44	11.74	11.56	11.92	12.21	11.74	11.33	11.7	11.54	11.48	11.61	0.0204021	0.00912978	0.739281	0.341722	0.0276566	0.188813	0.304565	0.742543	0.481544	0.241471	0.0832813	0.843494	0.817017
Id3	9.887	9.693	9.482	9.767	9.576	9.422	9.972	9.401	9.349	9.931	9.704	10.26	9.494	9.439	8.414	9.547	9.18	9.214	10.47	9.369	10.14	10.25	10.09	9.733	9.776	9.771	10.08	9.88	9.564	10.11	9.466	9.566	9.763	9.5	9.6	8.928	0.488877	0.0314739	0.00591112	0.445801	0.00738726	0.0447031	0.305711	0.668325	0.547127	0.788138	0.146808	0.138087	0.916578
Ifit1bl2	6.248	4.858	5.209	5.087	5.17	4.755	4.755	4.248	4.087	4.755	4.087	4.644	5.426	4.585	3.807	4.7	4.807	4.248	3.807	5.087	4.755	5.7	4.954	5.248	5.426	4.459	3.7	4.524	4.7	4.907	3.7	5.322	4.807	5.392	3.907	3.807	0.0225426	0.0672691	0.618299	0.361357	0.196164	0.696084	0.305885	0.687369	0.530274	0.24457	0.22437	0.78388	0.828862
Rgs16	3.17	4.7	4.248	3.459	3.322	3.459	3.585	3	3.459	3.7	2.807	3.585	5.7	4.17	9.919	3.459	3.459	3.459	3.807	3.17	3.17	3.807	3.322	3.585	3.807	3.907	3.7	3.807	3.7	5.209	3.7	3.907	3.907	5.087	3.907	3.807	0.556376	0.0447949	0.0114665	0.388326	0.362373	0.960832	0.306711	0.416223	0.0717868	0.833292	0.178693	0.179073	0.858528
Ccr6	5.087	5.807	5.492	4.644	5.807	5.585	5.492	5.426	5.954	6.044	6.644	5.954	6.476	4.644	7.57	5.17	5.555	4.858	6.555	4.954	5.728	6.248	6.644	6.392	6.858	6.34	5.615	5.644	5.907	5.755	3.7	3.907	5	4.858	3.907	5.728	0.203662	0.442915	0.606029	0.867067	0.000401509	0.000641836	0.307526	0.00211903	0.027625	0.529866	0.654568	0.780395	0.985995
Cxcl14	10.42	10.51	10.85	11.13	11	10.57	11.12	11.52	10.85	11.06	11.36	10.74	11.14	10.92	8.558	10.95	11.22	11.41	10.92	11.39	11.36	10.11	11.22	11.15	10.93	10.94	11.37	11	10.84	10.65	10.88	11.13	11.17	11.19	10.96	11.1	0.228535	0.874238	0.174982	0.813684	0.875122	0.6947	0.307915	0.823535	0.216459	0.562901	0.948904	0.432885	0.985995
S100a11	12.9	12.78	13.19	13.48	12.95	12.94	12.78	13.41	13.33	13	13.24	12.95	13.38	13.2	12.35	13.61	13.58	13.43	12.83	13.41	12.91	12.37	13.12	13.19	12.26	12.88	12.85	13.07	13.04	12.6	13.05	13.42	13.36	13.6	13.67	13.39	0.669829	0.239182	0.447467	0.308607	0.0206547	0.00151789	0.30803	0.388617	0.0651838	0.875342	0.454546	0.709376	0.791431
Fem1c	9.466	9.058	9.177	8.916	8.581	9.006	9.226	8.997	9.055	8.951	8.945	9.155	9.028	8.904	8.765	8.83	8.87	8.827	8.977	9.224	9.077	9.338	9.351	9.51	8.966	9.122	9.077	8.992	9.331	9.055	8.823	9.014	9.02	9.405	9.333	8.957	0.863899	0.185033	0.136502	0.205943	0.210237	0.990151	0.30838	0.957459	0.28435	0.945592	0.386935	0.377454	0.650074
Cdh11	8.155	8.577	8.589	9.182	8.88	8.039	8.224	8.801	8.842	8.873	8.524	8.017	8.957	9.114	7.728	9.014	9.248	8.488	8.562	8.741	9.152	8.061	9.555	8.665	7.907	8.697	8.651	9.036	8.066	7.994	9.175	9.231	9.114	8.992	9.18	8.535	0.927315	0.467761	0.414462	0.129775	0.338234	0.0166583	0.308592	0.867766	0.238012	0.974209	0.677192	0.680076	0.523646
Nod1	9.948	9.602	9.773	9.036	9.288	9.443	9.672	8.618	8.5	8.928	8.618	9.905	8.679	8.718	8.322	8.577	8.422	8.98	10.14	8.69	9.414	10.28	8.983	9.355	9.825	8.928	9.222	9.044	9.439	9.83	9.122	8.718	9.066	8.353	8.175	8.992	0.0762872	0.00152841	0.111805	0.714449	0.00755615	0.0184638	0.308655	0.666668	0.552857	0.375383	0.0329956	0.350022	0.985995
Fosb	5.833	6.807	6.508	5.833	5.755	7.665	6.322	6.375	6.443	5.858	6	6.409	6.476	7.735	3.807	6.931	6.977	7.484	6.304	7.331	7.585	6.833	7.7	6.954	5.644	5.524	7.366	6.687	7.044	5.392	6.977	6.585	7.313	8.484	7.919	6.768	0.722695	0.718695	0.475911	0.0783605	0.632909	0.0280928	0.309397	0.933546	0.272345	0.88167	0.881391	0.718762	0.402214
Fyn	9.76	9.195	9.723	9.568	9.674	9.718	9.817	9.762	9.555	9.539	9.695	9.392	9.56	9.568	9.455	9.655	9.697	9.834	9.607	9.892	9.92	9.311	9.75	9.794	9.642	9.392	9.441	9.514	9.845	9.576	9.85	9.79	10.01	9.688	9.716	9.692	0.858679	0.848381	0.989517	0.212861	0.492422	0.0581179	0.312707	0.725096	0.177027	0.945592	0.93898	0.994939	0.654891
Hivep1	8.622	8.484	8.833	9.217	8.618	8.901	8.451	9.119	9.063	9.18	9.264	8.414	8.931	9.087	9.195	9.29	9.209	9.283	8.524	9.269	8.88	8.061	9.371	9.157	8.388	8.87	8.945	9.061	8.725	8.543	9.185	9.255	9.212	9.238	9.386	9.127	0.451128	0.0376665	0.16937	0.49985	0.0539094	0.0114475	0.314453	0.906542	0.372925	0.747467	0.163593	0.424293	0.946012
Akap13	9.229	8.954	9.551	9.773	9.468	9.77	9.246	10.15	10.04	9.828	9.847	9.399	10.05	10.22	9.514	10.23	10.28	10.63	9.297	10.1	9.405	8.823	9.36	9.52	8.87	9.52	9.609	9.842	9.492	9.26	10.25	10.34	10.37	10.09	10.14	10.18	0.138324	0.00106987	0.0457422	0.940053	0.000206691	0.000256074	0.314769	0.678883	0.15986	0.445676	0.0280458	0.247914	0.993829
Prkca	7.209	6.833	7.775	8.238	7.889	7.977	7.375	8.626	8.558	8.785	8.527	7.468	8.558	8.418	8.414	8.889	8.855	8.768	7.109	8.103	7.925	7.109	8.322	8.066	7.459	8.2	8.516	8.322	7.925	7.451	8.34	8.741	8.592	8.707	8.629	8.459	0.0309971	0.000406683	0.100303	0.419298	0.00317336	0.0237984	0.316565	0.595936	0.633154	0.272521	0.0186566	0.343872	0.889493
Stab1	7.637	7.516	7.801	8.335	7.931	7.577	7.87	8	8.195	8.214	7.972	7.615	8.439	8.414	8.353	8.304	8.313	8.165	7.539	8.15	8	7.077	7.989	8.028	7.384	7.87	7.775	8.175	7.781	7.484	8.34	8.271	8.409	8.2	8.317	7.931	0.275023	0.0022958	0.0348279	0.746371	0.00884099	0.00387138	0.317259	0.712539	0.523982	0.616005	0.0385672	0.226227	0.985995
Hdc	10.64	9.683	10.32	8.604	8.791	9.101	7.508	8.243	7.931	7.555	7.755	7.762	9.553	9.006	7.044	9.119	9.983	9.79	8.375	10.04	8.426	8.745	8.907	10.05	7.18	7.238	7.895	8.205	10.06	7.585	8.581	9.14	8.418	10.57	9.889	9.224	0.000766137	0.350523	0.00918948	0.0290454	0.649819	0.00987796	0.317828	0.327683	0.983552	0.0624883	0.575579	0.156862	0.28567
Adamts4	3.585	3.7	5.044	3.459	3.907	3.459	3.585	3	3.459	3.322	2.807	3.585	3.7	3.322	3.807	3.459	3.459	3.459	4.954	4.858	3.17	3.807	3.322	4.087	3.807	3.907	3.7	3.807	3.7	3.907	3.7	3.907	3.907	3.7	3.907	3.807	0.0222152	0.177497	0.313049	0.339423	0.375361	0.944004	0.318142	0.736536	0.504678	0.24457	0.380041	0.587667	0.817017
Fbxl7	6.833	6.19	6.687	6.714	6.409	6.768	6.57	5.977	5.426	5.954	6.087	6.304	6.977	6.687	3.807	6.7	6.644	6.833	6.728	6.426	6.807	6.585	6.508	6.629	6.476	6.19	6.728	6.459	7.098	6.781	6.426	5.954	6.304	6.066	3.907	6.768	0.169355	0.40909	0.572889	0.983386	0.0775884	0.0743959	0.320497	0.490162	0.0975113	0.487205	0.626873	0.756981	0.997849
Adgre1	6.672	6.833	6.895	7.322	7.267	6.966	7.066	7.907	7.665	7.577	8.262	7.248	7.721	7.468	3.807	7.82	7.807	7.087	6.989	7.977	7.19	6.539	7.322	7.781	6.954	7.814	7.098	7.6	7.741	6.907	6.781	7.629	7.248	7.358	8.017	7.418	0.132615	0.920731	0.110079	0.897877	0.790929	0.891133	0.324899	0.796564	0.216881	0.4365	0.958605	0.350022	0.989854
Edn1	8.304	7.814	8.721	8.375	8.011	8.633	8.741	9.678	9.226	9.147	9.873	9.26	8.15	8.43	3.807	8.604	8.205	8.644	8.392	8.728	8.839	8.214	8.366	9.157	8.707	9.362	8.262	9.401	8.827	9.185	9.377	8.281	9.197	8.313	8.397	8.778	0.0411386	0.168336	0.0012637	0.477672	0.821877	0.62642	0.326262	0.255761	0.038897	0.307317	0.366642	0.0823812	0.939132
Cxcr6	5.087	5.555	5.977	5.492	5.931	5.555	5.672	5.954	6.109	5.883	6.229	5.459	5.7	5.644	3.807	5.977	5.392	5.358	6.109	6.285	5.977	6.585	6.209	5.672	6.15	6.17	6.044	5.728	6.229	5.555	5.858	6.644	5.858	6.285	3.907	5.807	0.374482	0.371728	0.0802677	0.615985	0.200893	0.42989	0.327198	0.779102	0.481517	0.68653	0.593148	0.310087	0.98028
Cnn2	11.94	11.54	11.61	11.33	11.58	11.39	11.47	10.89	10.97	11.16	11.04	11.51	10.98	10.97	9.527	11	10.82	10.97	11.72	10.94	11.83	11.87	11.4	11.47	11.51	11.15	11.3	11.28	11.52	11.72	11.14	10.98	11.33	11.12	11.04	11.09	0.0471449	8.5e-05	0.0205976	0.514578	0.0334284	0.127661	0.327611	0.117003	0.541592	0.320442	0.00764458	0.206614	0.958629
Irf4	5.322	5.524	4.755	5.209	5.087	5.728	5.755	5.492	5.285	5.807	5.931	6	6.129	5.087	7.459	5.129	4.644	4.858	6.087	5.129	5.728	6	5.833	5.615	6.066	6.15	5.672	5.285	5.833	5.392	5.459	5.248	4.954	4.858	3.907	3.807	0.170269	0.379226	0.61261	0.99748	0.00260786	0.00258607	0.329688	0.00605991	0.0599266	0.487205	0.597636	0.783372	0.998841
Adam19	9.264	8.331	8.974	8.392	8.299	8.647	8.267	7.895	7.735	7.864	7.852	8.362	8.224	8.243	3.807	8.098	7.937	8.455	8.801	7.877	8.459	8.496	8.484	8.907	8.524	8.16	8.119	8.43	8.931	8.52	8.451	8.234	8.285	8.651	8.629	8.711	0.140003	0.00975776	0.225487	0.896692	0.980803	0.915751	0.335581	0.0629371	0.34956	0.448072	0.0832813	0.489666	0.989854
Yes1	9.32	8.974	8.922	9.162	9.082	9.09	9.498	9.18	9.209	8.983	9.106	9.207	9.079	8.986	8.109	8.892	9.175	8.752	8.997	9.34	9.297	9.134	9.09	9.175	9.308	8.922	9.058	9.014	9.071	9.248	8.707	8.791	8.873	8.845	8.904	8.913	0.409674	0.0481689	0.00687833	0.590373	0.0127481	0.0441356	0.336771	0.682047	0.578156	0.711444	0.186084	0.138087	0.98028
Kcnq1ot1	7.707	7.629	7.651	6.768	7.119	7.14	7.276	6.687	6.943	6.539	6.794	7.562	6.555	7.011	7.775	6.539	6.87	7.34	7.807	7.109	6.87	7.895	6.6	7.14	7.366	6.768	7.313	6.919	7.19	7.492	7.492	7.119	7.375	6.672	7.14	6.768	0.107841	0.16005	0.830303	0.782135	0.527221	0.720939	0.337994	0.575918	0.686279	0.414999	0.357073	0.894807	0.985995
S100a8	16.82	14.61	15.18	13.63	14.18	14.04	11.29	12.8	11.86	12.14	12.25	11.85	14.72	13.83	10.19	14.24	14.96	14.46	11.81	14.25	13.11	13.92	13.93	14.7	10.05	11.03	10.85	12.73	15.12	11.35	13.01	14.43	12.79	15.62	15.2	14.53	0.000418511	0.152092	0.0189684	0.0152713	0.356996	0.00140535	0.33812	0.0991783	0.473157	0.0511979	0.347775	0.202605	0.28567
Stat3	11.08	10.77	10.8	10.47	10.62	10.54	10.7	10.61	10.5	10.37	10.39	10.43	10.46	10.46	10.24	10.51	10.47	10.73	10.44	10.72	10.49	10.61	10.44	10.61	10.39	10.32	10.56	10.42	10.82	10.38	10.34	10.33	10.45	10.58	10.35	10.37	0.0499168	0.0318394	0.837319	0.508443	0.166141	0.459701	0.340174	0.56233	0.704385	0.333081	0.146808	0.894807	0.954468
Mmp13	3.459	4.524	3.322	3.585	3.459	3.459	4.524	3	3.459	4.858	3.459	4.17	4.644	3.7	3.807	3.459	3.459	3.459	3.807	3.807	3.17	5.7	4.087	3.585	3.807	4.087	3.7	3.807	3.7	3.907	5.459	4.807	4.644	3.7	3.907	3.807	0.424648	0.728365	0.649775	0.580308	0.299367	0.116483	0.340878	0.621728	0.152692	0.722023	0.888554	0.793845	0.98028
Il17ra	8.422	7.665	8.405	8.384	8.14	8.05	7.919	8.618	8.633	8.807	8.858	8.224	8.455	8.087	8.285	8.934	8.972	9.039	7.954	8.566	7.972	7.044	8.647	8.725	7.313	8.57	8.607	8.175	8.504	7.755	8.195	8.687	8.304	8.637	8.539	8.562	0.177763	0.0705388	0.625358	0.991241	0.172952	0.176288	0.340981	0.738033	0.533634	0.496658	0.228086	0.784959	0.997849
Ptpn14	6.508	6.129	6.15	5.728	6.087	5.644	6.248	5.322	5.781	5.807	5.492	6.044	5.781	5.585	7.267	5.858	6.022	5.644	6.459	5.17	5.977	6.19	5.7	5.907	6.57	5.7	6.19	6.109	5.883	5.883	6.476	5.907	5.555	6.358	3.907	6.129	0.400368	0.96132	0.427642	0.612272	0.560538	0.27955	0.341981	0.705464	0.187805	0.710271	0.97351	0.693216	0.98028
H2-Aa	12.16	12.66	12.65	13.1	13.11	12.96	12.93	13.37	13.39	13.21	13.59	12.9	13.09	12.9	12.81	13.14	12.73	12.81	12.56	13.41	13.01	11.97	13.32	13.25	13.07	13.22	13.3	13.2	13.12	12.85	12.7	13.03	12.84	12.71	12.94	13	0.0185479	0.453968	0.0944619	0.271477	0.78833	0.174228	0.3425	0.472234	0.814851	0.241471	0.665095	0.336813	0.746308
Tnfsf10	7.592	7.814	7.516	9.061	8.234	7.451	8.524	9.042	9.185	9.609	9.093	7.852	9.529	9.306	3.807	9.15	8.804	8.596	8.082	8.721	8.997	7.679	9.607	8.508	8.618	9.455	9.18	9.231	7.983	7.948	8.861	9.516	9.311	8.596	9.15	8.224	0.122157	0.670555	0.255182	0.818561	0.565005	0.728501	0.344587	0.915007	0.294009	0.429794	0.841619	0.52466	0.985995
Cyp1b1	5	5.781	5.585	5.426	5.615	5.728	6.409	5.322	5.426	5.044	5.459	6.109	5.977	5.524	7.119	6.022	5.285	6.304	5.555	5.17	5.209	6.066	5.459	5.248	6.741	5.459	4.907	6.375	6.19	6.304	3.7	5.555	4.807	5.087	3.907	3.807	0.746869	0.12175	0.215299	0.103004	0.00520017	5.1e-05	0.345864	0.00275528	0.000199374	0.889938	0.308153	0.478878	0.478511
Acot3	3.17	3.7	4.087	3.459	3.322	3.459	3.585	3	3.459	3.322	2.807	3.585	4.322	3.322	7.516	3.459	3.459	3.459	3.807	3.17	3.17	3.807	3.322	3.585	3.807	3.907	3.7	3.807	3.7	3.907	3.7	3.907	3.907	5.426	3.907	3.807	0.5742	0.096587	0.0294619	0.443453	0.144396	0.476528	0.349177	0.879676	0.278391	0.840951	0.269562	0.213718	0.916578
Csf3r	11.01	9.283	10.68	9.278	9.441	9.598	7.852	8.492	8.017	8.637	8.771	8.322	9.609	9.498	3.807	9.856	9.904	10	7.577	9.006	8.974	9.071	10.03	10.8	7.285	8.022	8.248	9.116	10.97	7.948	9.426	10.08	9.175	10.73	10.32	10.46	0.0272521	0.1058	0.520403	0.337647	0.242504	0.0380545	0.350118	0.0519653	0.292273	0.256449	0.28239	0.737956	0.817017
Ctss	9.707	9.492	9.934	9.992	9.725	9.478	9.928	10.78	10.46	10.58	10.99	9.922	10.05	10.06	9.842	10.22	10.18	10.23	9.175	10.43	9.647	8.155	10.08	10.42	9.384	10.62	10.4	10.03	10.08	9.529	9.47	10.09	9.956	9.683	10.35	10.05	0.0126727	0.178808	0.2142	0.201993	0.309852	0.788284	0.350723	0.810037	0.486107	0.216319	0.380345	0.477881	0.644621
Kitl	10.46	9.943	10.06	11.15	11.02	10.54	10.4	11.31	11.23	11.33	11.17	10.09	10.77	11.01	9.124	11.11	10.81	10.55	10.35	11.07	10.98	10.29	11.12	10.73	10.58	11.04	10.99	11.23	10.62	10.27	11.07	11.17	11.19	10.9	10.85	10.8	0.156444	0.902268	0.193732	0.907591	0.381856	0.447115	0.35248	0.593284	0.147886	0.478459	0.953958	0.458707	0.989854
Bmp6	11.33	10.71	10.85	10.56	10.65	10.64	11.1	9.683	10.07	10.52	10.24	10.9	10.38	10.16	8.15	10.2	9.963	10.22	11.04	10.08	11.17	11.38	10.82	10.75	11.27	10.67	10.73	10.53	10.94	11.08	10.5	10.08	10.22	10.06	9.833	10.21	0.188194	0.0017278	0.045935	0.990439	0.0134008	0.0137945	0.353091	0.574077	0.710528	0.507848	0.0343216	0.247914	0.997849
Mmp19	7.539	7.098	7.435	7.295	7.209	7.418	7.248	7.451	7.129	6.781	7.14	7.384	7.57	7.313	7.2	7.295	7.285	7.937	7.492	7.762	6.931	7.129	6.615	7.768	7.524	7.109	7.459	7.077	7.629	7.392	7.229	7.57	7.994	7.443	7.313	7.418	0.406766	0.558203	0.161764	0.633524	0.224003	0.453604	0.356884	0.649728	0.637026	0.711235	0.759858	0.41808	0.98028
Sema6d	9.09	8.618	8.966	8.997	8.943	9.044	8.977	8.752	8.969	9.077	8.892	9.26	8.836	8.852	7.392	8.992	9.05	9.014	9.508	8.992	9.445	9.155	9.246	9.114	8.913	8.807	9.022	9.205	8.925	9.349	9.276	8.98	9.301	8.811	8.651	8.6	0.815476	0.192534	0.12709	0.286594	0.117193	0.602122	0.357969	0.844835	0.467454	0.936713	0.396965	0.365821	0.773382
Pdgfb	9.767	8.833	9.069	9.26	9.358	9.56	9.299	9.017	9.033	9.594	9.111	9.394	8.997	9.667	8.15	8.895	9.185	9.441	10.02	9.15	10.09	9.533	9.916	9.758	9.155	9.295	9.655	9.693	9.308	9.394	9.944	9.568	10.29	9.506	9.6	9.793	0.740563	0.21481	0.358505	0.109491	0.845945	0.0747483	0.360321	0.30916	0.058611	0.884879	0.421756	0.632208	0.484872
Sqstm1	11.56	11.41	11.36	11.4	11.25	11.19	11.42	11.44	11.37	11.54	11.43	11.03	11.6	11.38	11.65	11.47	11.39	11.46	11.05	11.33	11.37	11.1	11.51	11.18	11.49	11.44	11.41	11.61	11.24	11.19	11.25	11.38	11.31	11.45	11.53	11.25	0.920365	0.199577	0.235483	0.168018	0.297985	0.726641	0.361255	0.859743	0.277681	0.974209	0.402083	0.502801	0.587263
Krba1	7.2	6.7	7.087	6.285	6.585	7.19	6.615	6.322	6.209	6.375	6.539	6.883	6.966	6.248	7.57	6.459	6.087	6.508	7.409	6.229	6.883	7.484	6.644	6.833	7.119	6.555	6.845	6.629	6.781	7.119	6.392	6.459	6.672	6.392	6.794	6.267	0.109686	0.351465	0.488994	0.736495	0.0588016	0.114975	0.362634	0.478403	0.110665	0.414999	0.575839	0.731001	0.985995
Cebpb	11.72	11.32	11.76	10.85	10.92	11.14	10.77	11	10.94	10.59	11.07	10.74	10.99	11.05	11.64	11.09	11.43	11.53	10.59	11.67	10.89	10.58	11.12	11.67	10.76	10.8	10.78	10.84	11.76	10.66	11.18	11.17	11.15	12.11	11.65	11.29	0.0525785	0.987738	0.0508896	0.481335	0.125807	0.0291522	0.36448	0.279265	0.857732	0.338532	0.989086	0.250748	0.939132
Timd4	4.7	5.644	5.209	3.907	4.907	4.644	4.858	3.807	4.322	4.087	3.17	4.322	5.17	4.585	7.267	4.087	5.322	5	5.755	5.426	3.7	5.781	4.392	4.858	5.17	4.644	3.7	4.524	5.459	5.322	3.7	5.129	3.907	5.392	3.907	3.807	0.0942627	0.354769	0.0120254	0.674319	0.124155	0.256608	0.364621	0.0845051	0.0110029	0.395374	0.578667	0.1819	0.985995
Cxcr3	5.044	4.858	5.248	4	4.907	4.755	4.755	4.322	4.858	4.755	4.17	4.954	5.755	3.807	3.807	4.858	4.807	4.459	5.358	4.807	4.17	3.807	5.209	5.129	4.392	5.358	4.644	4.644	5.524	5.392	3.7	4.858	5.129	4.858	3.907	3.807	0.603716	0.493392	0.867153	0.444448	0.251983	0.0611579	0.365393	0.739777	0.219226	0.860277	0.705945	0.914498	0.916578
Siglecf	5.907	5.858	6.524	6.443	6.044	6	6.285	7.366	6.895	6.492	6.954	6.129	6.833	6.585	3.807	6.858	6.931	6.19	5.807	6.714	6.409	5.7	6.248	6.87	6.066	6.6	6.57	6.781	5.907	6.426	6.17	6.989	6.807	6.508	7.644	7.229	0.123333	0.840782	0.177091	0.777579	0.0983009	0.165842	0.365595	0.296642	0.0565401	0.429794	0.936184	0.436191	0.985995
Nmb	5.755	5.781	6.209	6.022	5.858	5.858	6.087	5.907	5.858	6.17	5.833	5.807	6.267	5.833	3.807	5.907	5.672	5.858	5.807	5.7	6	6.304	5.426	5.585	6.524	5.954	6.304	6.087	6.392	6.109	6.229	5.459	5.833	6.19	3.907	5.977	0.923238	0.254449	0.217656	0.176452	0.510369	0.0488711	0.370238	0.728717	0.580075	0.974209	0.476443	0.482657	0.601536
Batf	5.322	4.585	5.755	5.248	5.17	5.492	5.358	5.977	5.322	5.7	5.883	5.426	5.615	5.644	3.807	5.555	5.858	5.858	5.585	6.129	5.585	3.807	6.17	6.267	5.17	5.807	5.755	5	5.807	5.248	5.524	5.907	5.931	5.672	3.907	6.358	0.354386	0.733593	0.555072	0.736605	0.913483	0.81972	0.372535	0.750893	0.563159	0.675635	0.891486	0.741447	0.985995
Mmp8	10.79	7.972	8.904	7.721	8.205	8.061	5.858	7.607	6.476	7.055	7.16	5.426	9.386	8.665	3.807	9.551	10.08	9.817	6.524	8.963	6.755	6.794	7.679	8.658	5	6.087	6.19	7.044	9.474	5.492	7.658	9.358	7.209	10.53	10.25	9.257	0.01588	0.942072	0.0188667	0.20822	0.0698349	0.0034465	0.378426	0.177681	0.63085	0.224153	0.96735	0.202605	0.650354
Nampt	10.39	9.775	9.833	9.853	10.2	10.24	10.05	10.03	9.98	10.05	9.778	9.847	10.01	10.04	10.7	10.2	10.2	10.06	9.844	10.26	9.935	10.12	9.736	10.03	10.16	9.914	9.957	10.02	10.21	10.07	9.828	9.974	9.922	10.44	10.23	10.1	0.47094	0.236704	0.0618448	0.59787	0.460719	0.831982	0.378726	0.747469	0.232381	0.769135	0.453631	0.275116	0.98028
Rab3d	9.274	8.951	8.83	9.351	9.071	9.05	9.478	9.055	9.09	9.313	9.313	9.209	9.264	9.236	8.811	9.399	8.861	8.88	9.142	8.904	9.212	9.039	9.241	9.055	9.638	9.472	9.335	9.439	9.295	9.226	8.714	9.058	8.948	9.119	9.224	8.928	0.192105	0.914051	0.159227	0.0142346	0.39528	0.00157977	0.379226	0.598136	0.164142	0.514618	0.957076	0.412976	0.28567
Lrp5	10.39	10.03	10.32	10.34	10.22	10.42	10.2	10.03	10.08	10.23	10.07	9.99	10.19	10.2	9.853	10.3	10.22	10.66	10.02	10.22	10.18	10.15	10.2	10.37	10.25	9.916	10.17	10.31	10.11	10.06	10.5	10.32	10.64	10.24	10.26	10.45	0.0856934	0.641313	0.201812	0.611419	0.0528437	0.0167863	0.37942	0.0889366	0.394391	0.38353	0.820076	0.464358	0.98028
Smad7	10.79	10.06	10.65	10.72	10.72	10.78	10.73	10.88	10.9	11.08	10.87	10.73	10.45	10.75	8.986	10.72	10.47	10.8	11.01	10.67	11.2	10.51	11.06	11.05	10.58	10.87	10.91	11.11	10.98	10.95	11.55	10.88	11.45	10.98	10.93	10.77	0.246926	0.224437	0.0214935	0.936547	0.401368	0.358965	0.379718	0.149381	0.0241211	0.590371	0.433518	0.206614	0.993829
Sema4a	7.384	6.768	7.285	7.066	6.755	7.011	7.011	7.219	7.209	7.257	7.516	7.2	7.524	7.468	7.331	7.577	7.492	7.285	6.555	7.418	7.011	6.443	7.285	7.57	6.209	7.304	7.34	7.209	7.322	6.615	6.845	7.331	7.313	7.459	7.768	7.418	0.322453	0.042146	0.274331	0.805077	0.113291	0.0696748	0.381924	0.731839	0.592314	0.637068	0.175768	0.547172	0.985995
Olr1	5.285	5.17	5.755	5.858	5.492	5.728	5.755	6.539	6.492	6.426	6.7	5.585	6.066	6.34	3.807	6.209	5.755	6.022	5.907	6.492	5.7	3.807	5.931	5.931	4.807	6.358	6.375	6.358	6.022	5.248	5.807	6.375	6.57	6.322	6.794	6.322	0.0704236	0.688047	0.152233	0.537927	0.0579882	0.188424	0.383625	0.27778	0.0555213	0.361349	0.855977	0.40194	0.98028
Cbr1	9.106	9.182	8.948	8.476	8.94	8.647	9.394	8.439	8.29	8.687	8.704	9.222	8.618	8.504	8.665	8.455	8.451	8.512	9.066	8.185	8.994	9.6	8.669	8.934	9.73	8.889	8.814	8.804	8.861	9.236	8.555	8.516	8.7	8.658	8.83	8.335	0.631301	0.0809917	0.197016	0.451337	0.120447	0.0246799	0.384468	0.884792	0.467245	0.875342	0.239709	0.459982	0.92279
Rhoj	10.71	10.32	10.47	9.961	10.18	10.38	10.23	9.564	9.611	9.695	9.576	10.08	9.658	9.624	9.424	9.581	9.725	10.15	10.34	10.24	10.24	10.57	10.02	10.42	10.32	9.405	9.78	9.825	10.19	10.22	9.94	9.669	10.14	9.853	9.555	9.831	0.00155598	0.000273837	0.533391	0.0340068	0.0050479	0.431252	0.385045	0.451472	0.906466	0.0761391	0.0154613	0.737956	0.28567
Terf2ip	7.977	8.155	8.006	8.103	8.175	7.977	8.16	8.145	8.103	8.253	8.219	8.145	8.103	8.16	8.414	8.093	8.119	8.134	7.977	8.18	8.317	8.295	8.061	7.931	8.129	8.195	8.119	8.243	8.044	7.994	8.124	8.028	8.05	8.271	7.728	8.077	0.252598	0.254071	0.997081	0.94604	0.379881	0.417034	0.389652	0.156574	0.566773	0.596334	0.476443	0.999431	0.993829
Sgpp1	7.19	7.295	7.409	6.966	6.919	7.087	7.331	7.492	7.426	7.687	7.418	7.285	7.721	7.392	8.033	7.622	7.781	6.954	7.238	7.276	7.087	7.19	7.304	7.459	7.409	7.679	7.524	7.375	7.304	6.989	7.295	7.672	7.476	7.679	7.728	6.977	0.0460898	0.00416926	0.319392	0.401691	0.14598	0.526493	0.392563	0.267262	0.794681	0.31915	0.0548322	0.594097	0.872312
Vsir	11.14	10.41	10.77	10.27	10.2	10.21	10.4	10.07	9.922	10.36	10.21	10.09	10.45	10.1	9.674	10.37	10.32	10.6	10.11	10.04	10.71	10.21	10.65	10.89	10.37	10.21	10.33	10.16	10.66	10.16	10.04	10.19	10.3	10.46	10.44	10.59	0.0624634	0.150607	0.650113	0.48064	0.562803	0.898283	0.395855	0.534493	0.81749	0.351382	0.347775	0.793845	0.939132
Tnfrsf1b	9.602	9.484	9.248	7.755	8.299	8.451	8.781	7.539	7.577	8.119	7.954	9.022	7.781	7.585	7.775	7.15	7.943	8.155	8.972	7.858	8.5	9.551	8.655	9.014	9.031	8.295	8.145	7.762	9.066	8.629	7.858	7.845	7.814	8.353	8.317	7.728	0.0441274	0.0013483	0.165842	0.383457	0.0167447	0.110519	0.397729	0.489464	0.875484	0.314461	0.0322568	0.424138	0.855493
Hdac5	10.89	11.23	10.51	9.557	10.28	10.14	10.73	9.085	9.231	9.747	9.514	10.98	9.349	9.364	9.455	9.276	9.071	9.347	11.08	9.111	10.31	11.91	9.79	10.24	10.84	9.867	10.05	9.807	10.2	10.86	9.629	9.234	9.577	9.531	9.278	9.329	0.118164	0.00263876	0.107402	0.695324	0.00788046	0.0204059	0.398316	0.764851	0.583137	0.42937	0.0421054	0.350022	0.985995
Il12b	3.17	3.7	4	3.459	3.322	3.459	4.524	3.17	3.585	3.322	3	3.585	5.426	3.322	3.807	3.459	3.459	3.459	3.807	3.17	3.17	3.807	3.322	4.392	3.807	3.907	3.7	3.807	4.585	3.907	3.7	3.907	3.907	3.7	3.907	3.807	0.963086	0.271823	0.291948	0.21857	0.445026	0.63324	0.399194	0.808867	0.280255	0.985495	0.491423	0.567514	0.6575
Myh4	3.17	3.7	3	3.459	3.322	9.197	3.585	3	3.459	3.322	2.807	3.585	2.807	3.322	13.28	3.459	3.459	3.459	3.807	3.17	3.17	3.807	3.322	3.585	3.807	3.907	3.7	3.807	3.7	3.907	3.7	3.907	3.907	6.066	3.907	3.807	0.36801	0.559024	0.142529	0.769946	0.511013	0.713998	0.399333	0.95847	0.428615	0.68653	0.759858	0.387322	0.985995
H2-Ea-ps	3.17	3.7	3	3.459	3.322	3.459	3.585	3	3.459	3.322	2.807	3.585	2.807	3.322	3.807	3.459	3.459	3.459	3.807	3.17	3.17	3.807	3.322	3.585	3.807	3.907	3.7	3.807	3.7	3.907	6.895	3.907	3.907	3.7	3.907	3.807	0.856031	0.916654	0.774918	0.314449	0.0101343	0.0966105	0.400549	0.0723345	0.321654	0.945592	0.957076	0.864838	0.793738
Il1rn	6.82	6.807	6.57	6.672	6.7	6.807	5.392	7.066	6.728	6.022	6.989	5.129	7.435	6.87	3.807	7.209	7.954	6.954	5.358	7.392	6.15	3.807	6.629	6.87	5.426	6.409	6.34	6.57	7.066	5.209	6.229	7.443	6.409	8	7.768	7.358	0.350626	0.963869	0.374021	0.802031	0.0372284	0.0636576	0.402435	0.126351	0.476031	0.673154	0.97449	0.639934	0.985995
Col1a2	11.05	11.51	11	11.05	11.28	11.15	11.02	10.22	10.19	10.23	10.3	11	10.33	10.12	10.73	10.25	9.904	10.47	11.12	10.31	11.08	11.74	10.73	11.15	11	10.15	10.19	10.23	11.01	10.96	10.52	10.01	10.59	10.23	10.18	10.07	0.00249865	0.000193481	0.359214	0.0452497	0.000943591	0.128364	0.402829	0.690548	0.658514	0.0904226	0.0125745	0.632208	0.315352
Igf2	4.459	3.7	4.7	4.644	4.7	4.858	5	3.907	4.392	4.459	4.524	4.459	4.644	4.459	3.807	4.087	3.459	4.7	5.209	4.248	4.954	5.858	4	4.807	5.907	5.044	4.907	4.524	4.954	5.555	3.7	3.907	5	5.044	3.907	3.807	0.858797	0.29369	0.381017	0.316703	0.0456808	0.00406415	0.403796	0.479367	0.128216	0.945592	0.510825	0.648879	0.793738
Itgb1	12.78	12.44	12.51	12.99	12.71	12.72	12.66	12.97	12.96	12.89	12.92	12.53	12.9	12.83	11.78	12.94	12.71	12.74	12.49	12.99	12.9	12.39	12.98	12.86	12.7	12.77	12.68	12.87	12.81	12.51	12.73	12.83	12.86	12.81	12.81	12.67	0.381173	0.777767	0.249627	0.760536	0.910068	0.676396	0.404243	0.77994	0.268133	0.687971	0.922171	0.51613	0.985995
Hnf1b	6.755	7.14	7.011	7.14	7.055	6.919	7.119	7.19	6.989	6.87	7.119	7.349	7.16	6.768	3.807	7.066	7.129	7.229	7.524	7.2	7.384	6.833	7.539	7.555	6.728	7.267	7	7.257	6.989	7.087	6.615	7.209	7.34	7.011	7.409	7.129	0.75357	0.151198	0.0834166	0.386798	0.501684	0.844372	0.404756	0.579795	0.170069	0.89213	0.347775	0.312531	0.857734
Gem	9.18	9.414	8.974	8.665	8.731	8.6	8.672	8.281	8.388	8.209	8.547	8.707	8.299	8.353	8.322	7.907	7.852	7.5	8.992	9.26	8.91	9.776	9.349	8.794	8.683	8.426	8.626	8.243	8.804	8.285	7.801	8.219	8.05	8.693	8.317	8.022	0.0131387	1.63e-05	0.0201044	0.00058239	2.72e-06	0.0706503	0.40494	0.665662	0.686082	0.219177	0.00266254	0.206614	0.106869
Itgb7	7.693	7.418	7.476	6.7	7.219	7.119	7.721	7.209	7.295	7.276	7.585	7.629	7.34	7.109	7.459	6.943	6.977	7.295	7.607	7.044	7.451	7.459	7.585	7.735	8.05	7.658	7.577	6.931	7.426	7.257	7.011	7.304	7.267	7.087	6.794	6.794	0.240758	0.585782	0.0904732	0.984373	0.00710173	0.00675866	0.41198	0.109697	0.42154	0.582842	0.776109	0.331314	0.997849
Ptprk	9.134	8.895	8.858	9.351	9.238	8.785	8.804	9.101	8.901	9.132	9.061	8.52	8.658	8.718	7.119	8.728	8.64	8.551	9.061	9.209	9.407	8.931	9.134	8.954	8.934	8.88	8.738	8.823	8.771	8.52	9.071	8.771	8.916	9.111	8.849	9.017	0.503238	0.00136234	0.00793411	0.0732698	0.387094	0.336677	0.412118	0.0718408	0.0111991	0.796071	0.0322568	0.145591	0.38971
Alox5	8.728	7.801	8.379	7.555	7.644	7.658	7.248	7.516	7.375	7.033	7.607	7.409	7.895	7.459	3.807	7.852	8.022	8.006	7.349	7.418	7.672	7.484	7.972	8.405	7.435	7.484	7.401	7.714	8.295	7.349	7.229	8.011	7.539	8.618	8.397	8.409	0.165466	0.0700401	0.652057	0.806612	0.45567	0.323873	0.413149	0.0722079	0.310575	0.487205	0.227476	0.793845	0.985995
Fgf2	8.185	8.974	7.907	6.989	7.781	7.781	8.006	6.883	6.6	7.16	6.615	8.414	7.16	6.87	3.807	6.644	6.895	7.34	8.455	7.055	7.889	9.162	6.977	7.366	8.093	7	7.295	7.098	8.238	8.504	7.295	6.883	7.14	7.267	8.114	6.794	0.167071	0.00314985	0.0844267	0.809816	0.229762	0.3336	0.413685	0.173112	0.575834	0.487205	0.0471834	0.314564	0.985995
Tgfa	7.375	7.392	7.687	7.864	7.707	7.555	7.209	7.644	7.954	7.794	7.547	7.129	7.814	7.679	7.119	7.989	8.022	8.119	7.679	7.919	7.547	7.331	7.741	7.845	7.109	7.468	7.409	7.562	7.531	7.637	8.077	7.96	8.155	7.864	8.585	8.214	0.741096	0.210436	0.116961	0.148561	0.00433395	7.35e-05	0.423248	0.213791	0.0456878	0.884879	0.415216	0.350022	0.551088
Pik3cg	7.219	6.555	6.807	6.066	6.409	6.34	6.7	6.966	6.658	6.794	7.011	6.6	6.492	6.524	7.331	6.82	6.895	6.459	6.492	6.629	6.7	6.129	6.919	6.87	6.728	6.714	6.883	6.392	7	6.15	6.845	6.931	6.629	6.931	7.313	6.728	0.214185	0.292801	0.844476	0.903894	0.129253	0.160829	0.423851	0.732424	0.256653	0.545873	0.510825	0.898327	0.989854
Daglb	7.2	6.87	7.555	7.516	7.468	7.384	7.295	7.418	7.209	7.358	7.735	7.34	7.839	7.443	8.414	7.622	7.18	6.966	7.238	7.285	7.435	7.19	7.889	7.555	7.687	7.827	7.459	7.889	7.592	7.687	7.622	7.285	7.34	7.066	7.644	7.459	0.729276	0.165692	0.292836	0.145032	0.866279	0.105989	0.424218	0.269734	0.0622122	0.884775	0.361958	0.567514	0.545916
Clec5a	5.755	5.426	5.129	5.459	5.087	4.7	4.807	5.833	4.858	5.585	5.358	4.807	6.022	5.781	3.807	5.17	6.229	5.17	3.807	5.044	4.907	3.807	5.644	5.931	5	5.285	5.555	5.209	5.644	5	3.7	6.15	5.322	6.19	3.907	6.087	0.902936	0.805227	0.712666	0.315912	0.383089	0.893851	0.425412	0.656061	0.722813	0.964709	0.928481	0.82488	0.793738
Man2b1	9.315	8.785	9.257	9.32	9.304	9.155	9.106	9.248	9.185	9.274	9.541	9.122	9.338	9.19	8.945	9.437	9.157	9.132	8.672	9.306	9.288	8.267	9.331	9.451	9.241	9.405	9.185	9.358	9.577	8.94	8.883	9.224	9.197	9.394	9.039	9.236	0.716326	0.946264	0.767118	0.143502	0.483168	0.43515	0.428868	0.653143	0.730363	0.880695	0.96735	0.863596	0.545569
Ifnar2	8.547	8.366	8.644	9.19	8.898	8.788	8.647	9.129	9.134	9.262	9.382	8.6	9.246	9.061	8.531	9.29	9.09	8.943	8.64	9.177	9.014	8.061	9.274	8.983	8.765	9.202	9.085	9.18	8.919	8.524	9.197	9.177	9.129	9.129	9.195	9.175	0.113299	0.111896	0.994756	0.622105	0.0891793	0.218393	0.429897	0.93387	0.383758	0.423269	0.292596	0.998839	0.98028
Hbegf	8.6	8.379	8.592	9.165	8.798	8.748	8.581	8.98	8.895	8.91	8.845	8.29	9.2	9.844	8.353	9.142	9.039	9.119	8.611	8.951	9.297	8.375	9.496	9.137	8.672	8.778	9.142	9.109	8.604	8.472	9.455	9.642	9.615	9.292	9.264	9.313	0.851229	0.0451802	0.0670832	0.353751	0.025541	0.00249306	0.430128	0.856315	0.33366	0.945592	0.179149	0.286274	0.822277
Pdgfrb	8.082	8.082	8.039	7.562	8.119	7.665	7.833	7.508	7.651	7.687	7.409	7.492	8.093	7.762	7.119	7.658	7.435	7.755	7.966	7.748	8.459	8.322	8.017	8.304	8.219	7.852	8.205	7.943	7.687	7.877	7.87	7.748	7.954	7.644	7.845	7.807	0.0237711	0.0453974	0.772285	0.221923	0.0251863	0.278077	0.43066	0.851705	0.331241	0.24457	0.179149	0.864497	0.662045
Birc3	8.972	8.755	8.934	8.496	8.618	8.516	8.299	8.185	8.422	8.214	8.459	8.418	8.531	8.281	8.285	8.577	8.711	8.898	8.547	8.845	8.379	8.725	8.558	9.003	8.443	8.257	8.039	8.418	8.983	8.496	8.488	8.29	8.155	8.52	8.629	8.468	0.00594032	0.204408	0.108167	0.0771693	0.0616621	0.912671	0.433371	0.653228	0.221489	0.150352	0.4066	0.350022	0.398889
Marco	6.7	5.931	7.285	4.907	5.524	5.907	7.57	7.295	7.276	6.768	7.5	6.392	7.098	7.484	3.807	6.476	6.741	6.34	8.633	7.516	5.728	3.807	5.977	5.977	7.755	6.87	7.358	6.34	6.524	5.954	7.295	6.845	7.238	6.508	7.077	6.19	0.0379986	0.579708	0.118264	0.303445	0.25372	0.908062	0.434621	0.672766	0.232333	0.305848	0.770844	0.350022	0.787028
Tm7sf3	8.82	8.484	8.281	8.422	8.34	8.379	8.951	7.794	7.877	8.234	8.238	8.877	7.977	7.948	8.071	7.901	7.735	7.775	8.765	7.889	8.527	8.94	8.326	8.405	9.29	8.422	8.304	8.257	8.392	8.707	8.16	7.637	8.093	8.071	8.262	8.093	0.512868	0.00656245	0.0316842	0.651625	0.0334591	0.0116023	0.435226	0.630778	0.76239	0.805994	0.0718931	0.217955	0.985995
Col15a1	7.858	8.52	7.451	7.295	6.833	8.071	7.577	6.658	7.098	7.022	6.895	7.672	6.858	7.19	10.02	6.6	7.15	7.098	8.344	7.295	7.19	8.895	7.304	7.679	7.257	6.943	6.392	6.57	7.209	6.672	6.585	6.845	6.954	7.18	7.077	6.443	0.185692	0.631496	0.391673	0.0192157	0.0200315	0.985865	0.436675	0.174431	0.551811	0.50476	0.813189	0.662415	0.28567
Col12a1	6.358	6.524	6.508	7.34	6.919	6.555	6.459	7.484	7.524	7.16	7.358	6.6	7.629	7.775	8.185	7.562	7.531	7.585	5.907	7.19	6.794	6	7.426	7.033	5.883	7.087	7.524	6.845	6.539	7.119	7.401	7.801	7.592	7.238	7.728	7.022	0.135988	0.000473834	0.0242766	0.680444	0.00766348	0.0208481	0.436689	0.464168	0.962972	0.443624	0.0193219	0.211103	0.985995
Egr2	4.858	5.524	5.358	3.459	3.322	4.644	4.954	3	3.907	4.322	3	4.954	4	4.858	3.807	3.459	3.459	3.459	3.807	3.322	4.807	6.304	4.524	5.285	5.322	4.392	3.7	3.807	5.285	5.7	3.7	3.907	3.907	5.492	3.907	3.807	0.298014	0.159464	0.704553	0.956594	0.253403	0.232163	0.437147	0.845719	0.558859	0.621706	0.357073	0.820154	0.997368
Nox1	3.17	3.7	3	3.459	3.322	3.459	4.585	3	3.459	3.322	2.807	3.585	4.322	3.322	3.807	3.459	3.459	3.459	3.807	3.17	3.17	3.807	3.322	3.585	3.807	3.907	3.7	3.807	3.7	3.907	3.7	3.907	3.907	3.7	3.907	3.807	0.588557	0.157184	0.373657	0.106994	0.0909793	0.933321	0.437375	0.836467	0.567051	0.852948	0.354993	0.639934	0.484776
Alcam	10.65	10.62	11.19	11.58	11.29	10.89	10.76	11.77	11.7	11.42	11.53	10.97	11.54	11.55	8.945	11.76	11.6	11.51	10.77	11.87	11.3	10.02	11.5	11.43	10.49	11.28	11.3	11.53	11.08	10.94	11.33	11.76	11.67	11.53	11.72	11.61	0.336913	0.73158	0.533866	0.892364	0.177471	0.139512	0.437749	0.47042	0.139299	0.659451	0.890513	0.737956	0.989854
Top2a	5	6.267	5.977	6.044	5.977	5.931	5.672	6.7	6.907	5.644	6.6	5.392	6.895	6.19	3.807	5.7	5.044	5.426	5.426	6.585	5.426	6.539	5.781	6.19	5.977	6.066	5.672	5.615	6.358	5.426	5.285	6.109	5.459	6.109	3.907	5.672	0.462416	0.362725	0.105275	0.72088	0.150346	0.273873	0.440645	0.699708	0.697916	0.759314	0.589757	0.349647	0.985995
Itgax	6.129	6.524	7.322	6.555	6.989	6.57	6.555	6.977	6.87	6.858	6.845	6.781	6.672	6.768	3.807	7.109	6.807	7.276	7.066	7	6.794	3.807	6.7	7.129	6.895	6.966	7.15	6.768	7.15	7.276	6.954	7.304	7.418	6.858	7.358	6.794	0.765077	0.537104	0.361754	0.170433	0.122986	0.85682	0.441935	0.128285	0.439454	0.899947	0.742438	0.632208	0.590083
Ptafr	8.124	8.05	7.794	6.954	7.313	7.349	6.895	6.375	6.322	7.077	7	6.741	7.658	7.087	3.807	7.119	7.615	7.129	7.257	7.276	7.409	7.484	7.807	8.05	7.248	7.257	6.931	6.845	8.165	6.304	6.358	7.435	6.833	7.401	7.644	7.34	0.0392995	0.0394776	0.998355	0.300551	0.35231	0.914329	0.443549	0.401081	0.940519	0.306871	0.169771	0.999431	0.784475
Mx2	5.555	5.248	5.392	5.129	4.907	4.087	5.931	3.807	4.524	4.7	4.7	5.358	5.7	4.585	3.807	4.644	4.807	4	6.087	4.087	4.7	6.409	4.954	5.615	5.931	5.129	5.555	4.954	5.358	5.931	3.7	3.907	4.459	3.7	3.907	3.807	0.541094	0.195987	0.48716	0.635333	0.000368855	9.49e-05	0.443803	0.0687751	0.0121644	0.824594	0.398489	0.729785	0.98028
Il3ra	8.375	8.524	8.267	7.34	8.071	7.547	8.304	7.055	6.954	7.409	6.954	8.145	6.883	7.304	7.459	7.17	7.219	7.492	8.707	7.209	8.028	8.622	7.492	7.937	8.087	7.267	7.484	7.375	7.748	8.447	7.16	7.15	7.119	6.989	7.459	7.313	0.043027	0.00617244	0.415087	0.318826	0.00440087	0.0483229	0.444454	0.92581	0.391796	0.312691	0.0701384	0.680076	0.79598
Cldn1	5.883	5.524	5.833	6.714	6.7	6.087	6.755	6.966	6.833	6.907	6.392	6.358	6.895	7.011	7.044	6.539	6.476	5.728	6.459	6.34	6.087	6.492	6.285	5.977	6.768	7.022	6.82	6.629	6.555	5.954	6.755	6.459	6.524	6.82	6.87	6.19	0.00928612	0.0247889	0.682028	0.102241	0.124263	0.918004	0.44771	0.586326	0.828049	0.194569	0.134778	0.80817	0.478511
Tnfrsf4	3.17	3.7	3.459	4.17	4.17	3.7	4.585	4.087	4.392	3.322	3.459	4.17	5.17	4.17	3.807	4.644	3.459	4.954	5.044	4.907	3.7	3.807	3.7	3.907	3.807	4.524	3.7	4.459	4.087	3.907	5.672	4.644	3.907	5.858	3.907	3.807	0.430279	0.0719687	0.296039	0.779777	0.194611	0.117943	0.450322	0.707034	0.70275	0.724328	0.228579	0.570322	0.985995
Tek	10.47	10.21	10.48	11.28	10.94	10.47	10.73	11.21	11.3	11.41	11.35	10.19	11.14	11.11	9.264	11.42	11.24	11.27	10.3	11.18	11.24	10.09	11.31	10.95	10.74	11.11	11.04	11.43	10.77	10.52	11.27	11.33	11.37	11.08	11.1	11.11	0.169694	0.345718	0.657228	0.747871	0.197913	0.329281	0.450343	0.801852	0.316679	0.487205	0.571525	0.79441	0.985995
Cytip	11.47	11.19	11.46	10.25	10.69	10.64	10.63	10.29	10.34	10.32	10.58	10.68	10.29	10.32	9.16	10.38	10.47	10.54	10.77	10.77	10.61	11.29	10.61	11.24	10.7	10.28	10.26	10.34	11.51	10.79	10.51	10.41	10.1	10.84	10.77	10.68	0.0409364	0.00192084	0.219811	0.301392	0.149992	0.673926	0.45055	0.186963	0.562815	0.307317	0.0352475	0.483956	0.784475
H2-Q2	6.539	7.555	6.931	5.858	6.658	6.109	6.954	5.807	5.555	6.322	6	7.209	6.044	5.833	3.807	5.555	5.672	5.977	7.022	5.833	6.34	8.124	6.15	5.954	7.516	6.285	6.19	6.524	6.6	6.954	5.977	5.644	5.7	6.066	6.87	5.672	0.433287	0.00553695	0.0365507	0.777981	0.13395	0.0778257	0.451523	0.316749	0.800428	0.726101	0.0645099	0.229301	0.985995
Icosl	8.219	8.589	8.604	8.883	8.83	8.592	8.707	8.969	8.823	8.98	9.101	8.883	8.877	8.637	9.177	8.785	8.765	8.913	8.721	8.435	8.714	8.375	8.873	8.765	8.801	8.735	8.931	8.718	8.842	8.867	8.422	8.752	8.669	8.401	8.693	8.928	0.0155633	0.0433881	0.654042	0.148659	0.979139	0.141794	0.452301	0.141854	0.4615	0.224153	0.175871	0.794106	0.551088
Ccl17	7.435	8.611	8.19	7.435	7.375	7.313	8.209	7.637	6.755	6.57	6.714	6.768	7.864	7.607	3.807	7.615	7.375	8.658	7.17	8.165	7.119	7.658	6.629	7.644	7.7	6.728	6.943	6.883	7.937	7.524	7.827	8.011	8.388	7.672	8.234	8.066	0.201946	0.236342	0.924137	0.815283	0.189557	0.124894	0.45594	0.0811339	0.30316	0.527502	0.453631	0.947369	0.985995
Peli1	9.155	9	9.335	10.05	9.856	9.527	9.426	9.994	9.97	9.937	10.05	9.295	9.702	9.83	9.231	10.12	9.618	9.486	9.185	9.786	9.56	8.794	9.896	9.635	9.253	9.864	9.842	9.731	9.609	9.074	9.426	9.681	9.426	9.667	9.765	9.453	0.140751	0.365008	0.558262	0.658225	0.630706	0.969238	0.457316	0.761147	0.658726	0.448072	0.589776	0.743674	0.985995
Ifit1bl1	5.087	4.585	5.833	5.977	5.858	5.358	4.807	6.087	6.508	6.6	6.209	5.555	6.931	6.19	3.807	6.375	5.977	6.109	5.7	5.931	5.672	6.907	5.977	5.931	5.615	6.109	6.585	5.931	5.833	6.508	5.728	6.585	6.285	6.209	3.907	6.19	0.222469	0.283283	0.879437	0.852236	0.625829	0.501317	0.460492	0.271133	0.711746	0.552948	0.504683	0.920837	0.985995
Gpr65	6.615	6.728	7.285	5.492	6.087	6.248	6.267	5.907	6.109	5.858	6.285	6.17	6.728	6.248	7.622	6.285	7.077	6.895	6.585	6.555	5.833	6.443	6.248	6.977	6.087	6.524	6.209	6.022	7.295	6.426	6.229	6.409	6.087	7.768	7.2	6.7	0.278586	0.164434	0.016742	0.963398	0.306688	0.286015	0.460687	0.787603	0.316138	0.616005	0.361958	0.202605	0.997368
Il4ra	10.9	10.35	10.47	9.957	10.18	10.09	10.26	9.624	9.524	9.794	9.709	10.18	9.711	9.718	9.514	9.811	10.05	10.57	10.47	10.44	10.27	10.55	10.1	10.39	10.46	9.527	9.892	9.982	10.6	10.08	10.1	9.401	9.823	9.714	9.424	9.956	0.0158015	0.0283414	0.802146	0.143722	0.00186029	0.0671531	0.462889	0.443537	0.138652	0.224153	0.142483	0.880083	0.545569
Glg1	9.664	9.74	9.589	9.993	9.799	9.638	9.796	9.825	9.803	9.943	10.07	9.628	9.785	9.819	9.541	10.1	9.667	9.709	9.615	9.986	9.793	9.504	9.926	9.709	9.681	9.781	9.827	9.919	9.839	9.397	9.806	9.844	9.681	9.907	9.306	9.622	0.365591	0.778945	0.530101	0.899547	0.603424	0.69368	0.465317	0.571881	0.867787	0.686301	0.922171	0.737956	0.989854
Pdcd1lg2	4.585	5.17	5.392	4.524	5.087	4.7	5.322	4.459	4.524	5.248	5	4.807	5.931	4.644	3.807	4.755	5	4.954	5.807	5.044	5.209	6.129	5.358	5.129	4.954	5.129	4.644	5.17	5.358	5.248	5.858	5	4.755	5.322	6.87	3.807	0.960948	0.854549	0.8931	0.282056	0.595819	0.580435	0.465403	0.805582	0.627019	0.985495	0.93898	0.931158	0.763946
Mrc1	8.574	8.748	8.96	9.017	8.711	8.925	8.755	9.137	9.017	8.762	9.014	8.607	8.87	8.943	8.69	8.889	9.011	9.197	9.095	9.132	8.836	8.543	8.718	8.877	8.392	8.948	9.039	8.913	8.785	8.64	8.633	9.231	9.262	8.858	9.347	9.09	0.660998	0.415749	0.705064	0.552658	0.140217	0.0425557	0.466293	0.629861	0.229943	0.875342	0.630751	0.820154	0.98028
Dhrs3	8.488	8.839	8.672	7.741	7.96	8.103	8.313	7.585	7.57	7.547	7.57	8.224	7.845	7.707	8.219	7.562	7.728	8.044	8.618	7.889	8.397	8.922	8.134	8.34	8.422	7.901	7.788	7.994	8.006	8.353	8.087	7.937	8.033	7.87	8.418	7.943	0.0112689	0.0211863	0.79194	0.108784	0.0800449	0.875319	0.467188	0.665821	0.766166	0.211675	0.125409	0.873755	0.484872
Prrx1	6.304	6.476	6.508	6.285	6.585	6.57	6.7	6.267	6.129	6.409	6.129	6.285	6.629	5.977	7.775	6.248	6.022	5.954	6.7	5.728	6.426	6.714	6.687	6.209	6.539	6.524	6.585	6.409	6.6	6.931	6.508	6.375	6.087	6.741	3.907	6.267	0.666149	0.947624	0.714368	0.549436	0.174703	0.054868	0.46726	0.356912	0.104617	0.875342	0.967393	0.82488	0.98028
Adamts3	5.044	5.644	5.781	5.044	5.907	5.392	6	5.644	5	5.044	4.248	5.129	6.087	5.322	7.2	4.7	5.322	5.044	5.807	5.426	5.17	6.248	4.807	5.248	5.492	5.044	5.755	4.858	5.728	6.209	6.476	5.644	5.585	5.615	3.907	5.615	0.401245	0.677104	0.212924	0.854356	0.947607	0.906158	0.469252	0.803925	0.33312	0.710271	0.846668	0.476482	0.985995
Kif20a	3.17	5.7	3	4.322	4.7	4.524	4.585	3.459	5.129	3.807	3.7	4.392	4.524	3.7	3.807	3.585	3.459	4.392	3.807	4.585	3.585	3.807	3.322	4.954	5.129	4.459	3.7	3.907	4.807	3.907	3.7	3.907	3.907	3.7	3.907	3.807	0.872834	0.367497	0.457086	0.392284	0.599127	0.171717	0.472327	0.788159	0.651216	0.947722	0.590671	0.712397	0.862085
Pycard	4.7	4.907	4.459	3.7	4.644	5.044	4.459	4.17	4.392	4.524	3.807	4.459	5.322	3.585	3.807	3.459	3.459	4.322	3.807	3.459	4.459	5.858	4.585	5.358	5	4.7	3.7	4.248	5.17	5.129	3.7	3.907	3.907	4.858	3.907	3.807	0.420471	0.0917745	0.363223	0.835675	0.0972273	0.0641355	0.473749	0.983317	0.486598	0.717733	0.260087	0.632978	0.985995
Col17a1	6.375	5.426	6.248	5.209	5.392	8.435	5.285	5.358	6.022	5.585	5.17	5.459	6.109	5.322	9.066	5.492	5.392	5.248	6.375	5.358	6.066	6.248	6.229	5.644	6.426	5.931	6	5.833	4.644	6.15	3.7	5.209	5.833	6.248	3.907	3.807	0.197673	0.887468	0.249475	0.771574	0.0309957	0.0582633	0.474768	0.144697	0.0337793	0.522143	0.949881	0.51613	0.985995
Map2k2	9.119	8.937	9.142	9.087	8.969	9.074	8.934	8.963	9.039	8.992	9.022	8.833	8.963	9.061	9.785	9.039	9.014	8.898	8.785	9.085	9.09	9.063	9.014	8.833	9.197	9.014	9.011	9.047	8.963	8.748	8.931	9.074	9.066	9.071	9.008	8.785	0.404011	0.507446	0.139366	0.865539	0.920287	0.944764	0.477548	0.689852	0.270493	0.710271	0.720035	0.381696	0.985995
Arhgef6	8.414	8.109	8.388	8.618	8.476	8.577	8.596	8.755	8.974	9.085	8.827	8.539	8.516	8.781	9.441	8.836	8.801	8.721	8.308	8.524	8.555	7.781	8.651	8.662	8.331	8.895	8.873	8.775	8.422	8.472	8.508	8.662	8.745	8.52	8.771	8.527	0.0202347	0.00859643	0.723786	0.161343	0.172693	0.969136	0.480076	0.327594	0.781525	0.241471	0.0822867	0.832695	0.584615
Tspan8	9.662	9.486	9.783	10.86	10.37	9.699	9.713	10.83	10.92	11.05	10.81	9.315	10.99	10.82	8.765	11.16	10.73	10.7	9.679	10.64	10.48	8.814	10.95	10.32	9.678	10.71	10.59	10.95	9.872	9.633	10.57	10.96	10.75	10.61	10.96	10.79	0.217746	0.144515	0.812987	0.804993	0.0987832	0.156398	0.480971	0.885882	0.397426	0.549228	0.341562	0.887994	0.985995
Vtcn1	6.755	6.6	6.755	6.443	6.17	6.087	6.476	5.615	6.492	5.907	6	7.14	6.807	6.129	3.807	5.426	6.129	5.615	7.349	5.833	6.285	7.781	6.755	6.322	6.358	5.954	5.555	6.109	5.883	6.807	6.392	5.954	5.858	6.833	3.907	5.977	0.635663	0.0558088	0.141726	0.147835	0.0359223	0.484464	0.482499	0.885363	0.575846	0.875342	0.205266	0.386717	0.551088
Selp	6.19	6	6.044	5.755	5.728	5.883	6.57	6.19	5.931	6.267	5.954	6.109	5.931	6.022	7.331	5.858	6.508	6.409	6.443	6.426	6.209	6.358	5.931	6.6	6.57	6.443	6.459	5.977	6.807	5.833	6.392	6.229	6.209	6.392	7.459	6.022	0.281738	0.0672364	0.429718	0.925689	0.574589	0.639341	0.484216	0.354887	0.818768	0.616005	0.22437	0.693216	0.993829
Ccr1	8.596	6.977	7.827	7.267	7.276	7.098	6.109	7.257	6.34	6.585	6.728	5.322	8.326	7.443	3.807	7.864	8.366	8.371	5.907	8.234	6.687	6.304	7.375	8.114	5.755	6.687	6.248	6.524	8.322	5.781	6.87	8.055	6.755	8.721	8.516	8.43	0.0578157	0.801271	0.0961872	0.339069	0.174685	0.0246427	0.485674	0.254211	0.651666	0.350078	0.928481	0.337806	0.817017
Cd68	8.658	8.697	9.109	9.116	8.945	8.811	8.892	9.401	9.246	9.344	9.558	8.948	9.033	8.969	8.741	9.145	9.231	9.329	8.626	9.288	9.033	7.96	9.142	9.306	8.64	9.409	9.32	9.074	9.098	8.748	8.48	9.14	9.098	8.781	9.347	9.095	0.0767132	0.329183	0.407965	0.411424	0.605136	0.75849	0.485861	0.742474	0.711125	0.375383	0.554176	0.674643	0.882997
Egf	3.585	4.585	4.17	3.459	4	5.858	4.907	3	3.807	4.524	3.459	4.585	4.087	3.7	8.718	4.087	3.459	4.248	3.807	3.459	4.087	3.807	3.807	3.807	4.755	4.322	3.7	3.907	4.17	3.907	3.7	4.807	3.907	5.615	3.907	3.807	0.686443	0.439535	0.24278	0.5602	0.385628	0.772972	0.486328	0.945809	0.529416	0.875342	0.653171	0.510235	0.98028
Fgfr1	8.205	8.2	8.349	8.349	8.326	8.574	8.397	8.022	8.028	7.989	7.87	8.384	7.983	8.238	9.124	8.229	8.257	8.558	8.308	8.15	8.358	8.459	8.039	8.508	8.392	8.14	8.262	8.093	8.304	8.119	8.285	8.317	8.48	8.468	8.468	8.248	0.115879	0.637882	0.0445469	0.53298	0.588456	0.247952	0.490683	0.960047	0.522398	0.427413	0.818542	0.247708	0.975579
Ikbke	6.845	7.762	6.931	5.492	6.15	6.285	6.658	5.209	5.644	5.907	5.524	7.022	6	5.585	7.119	4.907	5.129	6.044	7.539	5.524	6.322	7.592	5.977	6.508	7.219	6.267	6.109	5.248	6.358	7.285	6.229	5.807	5.781	5.044	3.907	3.807	0.185255	0.0796841	0.651208	0.708315	0.00165939	0.00447568	0.49485	0.2586	0.0749945	0.50476	0.238727	0.793845	0.985995
Rhog	11.55	10.7	11.45	10.89	10.83	11.01	10.66	10.75	10.72	10.7	10.92	10.6	10.85	10.62	9.831	10.91	10.88	11.15	10.91	11.14	10.94	10.62	11.15	11.42	10.8	10.63	10.8	10.7	11.38	10.79	11.04	10.96	11.07	11.4	11.03	11.01	0.0514661	0.0410256	0.916204	0.301261	0.750245	0.179697	0.496437	0.0927749	0.303867	0.334302	0.172073	0.94364	0.784475
Fcgr1	6.19	5.524	5.426	5.7	5.322	5.585	6.358	6.426	6.267	6.658	6.57	5.615	5.977	4.585	3.807	5.781	6.322	6.555	5.555	6.087	5.044	6.129	5.833	6.375	5.615	6.443	6.931	5.7	6.539	5.781	3.7	5.459	3.907	5.426	3.907	5.672	0.0719455	0.748665	0.0364032	0.379373	0.00382572	0.000341787	0.497739	0.0566466	0.205619	0.361349	0.908297	0.229301	0.848963
Met	8.539	8.392	8.704	8.665	8.637	8.405	8.238	8.558	8.547	8.353	8.447	8.468	8.672	8.581	7.954	8.555	8.375	8.044	8.679	8.889	8.547	8.308	8.945	8.804	8.18	8.397	8.672	8.833	8.459	8.033	8.185	8.707	8.5	8.669	9.134	8.711	0.420066	0.203823	0.634141	0.0836821	0.768203	0.14647	0.498245	0.484577	0.173489	0.717733	0.406538	0.785018	0.415018
Bcl2	7.87	7.781	8.066	6.781	7.276	7.426	7.637	6.768	7.229	7.276	6.907	7.889	7.011	7.011	7.57	6.392	6.833	7.267	7.651	6.7	7.492	7.931	7.229	7.755	7.794	7.295	7.384	6.768	7.409	7.977	7.755	6.966	7.15	6.907	7.14	6.794	0.298373	0.0348088	0.259611	0.926721	0.15745	0.184921	0.50016	0.596088	0.884362	0.621706	0.15563	0.532274	0.993829
Casp7	9.207	9.017	9.079	9.182	9.022	9.014	9.377	8.849	8.892	8.798	8.823	8.873	8.877	8.725	7.907	8.7	8.443	8.752	9.077	8.861	9.197	9.276	9.219	9.124	9.224	9.025	9.142	8.994	9.175	8.986	8.683	8.785	8.714	8.629	8.607	8.626	0.220848	0.0001593	0.0047882	0.776914	0.000762956	0.00165893	0.500806	0.6952	0.77703	0.552948	0.0116926	0.134694	0.985995
Nectin2	8.934	9.322	9.18	9.132	9.098	8.731	8.948	8.992	8.877	8.87	9.071	9.283	9.103	8.989	7.622	9.116	8.867	9.167	9.253	9.202	9.257	9.192	9.236	9.077	8.94	8.762	9.031	9.155	8.836	9.209	8.919	8.919	8.94	9.011	9.055	8.983	0.716582	0.124638	0.234828	0.195908	0.162436	0.913839	0.504465	0.917794	0.441635	0.880695	0.312441	0.502801	0.635207
H2-DMa	8.155	8.589	8.476	9.055	9.014	8.82	8.836	8.592	8.693	8.943	9.093	8.633	8.697	8.633	8.836	8.892	8.234	8.755	8.898	8.738	8.7	8.061	9.031	8.785	9.276	9.122	9.116	8.98	8.925	8.422	8.607	8.785	8.388	8.52	8.175	8.592	0.497685	0.950591	0.459686	0.110877	0.256935	0.00874102	0.504839	0.445738	0.157778	0.791054	0.969075	0.71334	0.485843
Adam8	11.07	10.08	10.24	8.414	8.827	9.311	8.839	8.17	7.977	7.658	7.748	8.562	9.401	8.948	3.807	9.058	10.09	9.665	8.626	9.609	8.34	9.941	8.945	9.79	8.527	7.651	7.622	8.134	10.07	8.017	8.581	9.137	7.96	10.76	10.08	9.082	0.0318782	0.0912695	0.61826	0.200863	0.931089	0.173182	0.511691	0.20531	0.533583	0.273077	0.259658	0.78388	0.643813
Tlr4	7.492	7.508	7.833	7.913	7.468	7.622	7.392	8.238	8.077	7.937	8.234	7.119	8.124	8.114	7.775	8.185	8.224	7.889	7.17	8.234	7.5	7.044	7.901	7.794	7.119	8.028	7.845	7.693	7.607	7.409	7.531	7.937	7.972	8.044	8.371	8.039	0.331376	0.043492	0.272614	0.961006	0.06486	0.071694	0.512325	0.893796	0.601107	0.650348	0.175871	0.546718	0.997368
Irf2	10.28	10.3	10.34	10.11	10.2	10.14	10.15	9.974	9.932	9.989	10.02	10.29	9.798	9.904	9.622	10.07	9.863	10.2	10.41	10.08	10.16	10.48	10.02	10.15	9.916	9.844	9.884	9.987	10.05	10.05	10.07	10.03	10.07	9.853	9.814	9.951	0.0962927	0.00287512	0.139326	0.0124587	0.015685	0.923928	0.51308	0.635367	0.262702	0.395374	0.0439653	0.381696	0.28567
Cdh13	7.109	7.276	7.409	7.714	7.304	7.331	7.109	7.119	7.392	7.714	7.098	7.34	7.055	6.931	7.907	7.459	7.331	7.524	6.989	6.87	7.219	7.577	7.109	7.401	6.644	7.022	6.755	7.426	7.17	6.989	7.248	6.833	7.011	7.531	7.358	7.592	0.663888	0.940157	0.610592	0.180193	0.632836	0.0732339	0.514775	0.775524	0.351093	0.875342	0.96735	0.783372	0.601536
Rictor	8.755	8.577	8.531	8.718	8.758	8.426	8.658	8.731	8.693	8.931	8.833	8.596	8.455	8.562	7.994	8.57	8.52	8.253	8.7	8.778	8.827	8.683	8.858	8.562	8.823	8.765	8.916	8.658	8.788	8.57	8.285	8.574	8.531	8.29	8.234	8.418	0.273421	0.0267522	0.0016591	0.854887	0.00174932	0.00106308	0.515468	0.44459	0.908063	0.616005	0.138283	0.0823812	0.985995
Tlr6	6.109	5.459	6.15	5.459	5.248	5.209	5	5.833	5.585	5.672	6.087	5.358	6.658	5.728	7.331	6.044	6.781	6.585	5.358	6.304	5.285	5.931	5.781	6.322	4.954	5.426	5.358	5.728	5.977	5.931	6.426	6.443	5.322	7.033	7.257	6.629	0.951957	0.00198938	0.00169133	0.331704	0.0164581	0.00133334	0.517761	0.558285	0.950588	0.984861	0.0356148	0.0823812	0.817015
Fzd6	8.119	8.006	8.022	8.039	8.16	8.022	8.295	7.615	8.134	8.234	8.05	8.119	8.082	8.093	7.954	7.943	7.977	8.134	8.562	8	8.353	8.349	8.317	8.317	8.331	8.098	8.114	8.388	8.124	8.285	7.755	8.022	7.954	7.96	8.607	8.039	0.90945	0.790076	0.704191	0.424107	0.030453	0.155336	0.518044	0.167684	0.453854	0.968938	0.928481	0.820154	0.897102
C3	12.49	12.59	12.55	12.32	12.32	12.27	12.16	11.94	11.8	12.05	12.52	12.26	12.24	12.26	13.88	12.3	12	12.53	12.44	12.26	13.01	12.58	12.35	12.33	12.15	12.94	12.15	12.43	12.46	12.29	12.34	12.09	12.14	12.63	13.09	13.14	0.193842	0.626555	0.0783902	0.689394	0.738075	0.464318	0.518205	0.913968	0.45151	0.517383	0.808245	0.306055	0.985995
Vwa5a	9.96	9.681	9.893	10.38	10.11	9.914	9.957	10.18	10.19	10.23	10.28	9.839	10.18	10.08	9.831	10.2	10.04	10.05	9.85	10.17	10.08	9.451	10.31	9.959	9.726	10.16	10.2	10.17	9.931	9.649	10.03	10.07	9.956	10	10.23	10.01	0.35263	0.575199	0.708623	0.983811	0.547224	0.560699	0.518725	0.976392	0.49993	0.674037	0.769143	0.82299	0.997849
Trex1	5	5.358	5.7	4.807	5.807	5.044	4.585	5.322	5.248	5.426	5.555	5.17	5.426	5.044	3.807	5.555	5.907	6.15	5.7	5.358	5.17	3.807	5.044	5.426	5.17	5.426	5.615	5.358	5.459	5	3.7	5.459	5.129	5.672	3.907	3.807	0.84662	0.934934	0.783341	0.474108	0.187645	0.0465648	0.520274	0.319956	0.106653	0.945592	0.967211	0.869852	0.939132
Ccr5	5.907	6.17	5.883	5.322	5.807	5.644	5.883	4.807	5.129	5.087	5.322	5.615	5.781	5.426	3.807	4.585	5.044	5.755	6.19	5.644	5.615	6.492	5.954	5.781	6	5.883	5	5.524	6.17	5.954	6.022	5.129	5	5.426	3.907	3.807	0.138439	0.0294796	0.452901	0.551344	0.00205173	0.00961534	0.521061	0.451487	0.167893	0.445676	0.143298	0.711841	0.98028
Siglec1	6.209	6.129	6.209	5.858	5.755	5.209	6.17	5.907	5.492	5.585	5.977	5.883	5.954	6.15	3.807	5.755	5.322	6.524	6.555	5.672	5.833	6.066	5.459	6.375	6.129	6.267	6.304	6.022	6.109	6.672	5.977	5.615	6.459	5.954	3.907	6.322	0.864872	0.376244	0.473236	0.461344	0.410444	0.124061	0.521268	0.964575	0.550251	0.945592	0.595179	0.718545	0.932855
Plaur	10.98	10.46	10.58	9.162	9.738	9.884	9.841	9.355	9.725	9.182	9.288	9.656	9.285	9.344	7.622	8.842	9.956	9.935	9.439	10	9.706	10.31	9.56	10.2	9.25	8.898	9.414	9.122	10.82	9.78	9.794	9.618	9.73	10.89	10.3	9.78	0.0684064	0.00635158	0.308091	0.339582	0.655485	0.165356	0.521441	0.0232272	0.0921598	0.361349	0.0706373	0.584337	0.817017
Icam1	8.762	9.069	9.371	10.48	9.815	9.106	8.611	10.51	10.46	10.55	10.48	8.948	10.56	10.59	8.071	10.6	10.55	10.47	8.937	10.58	10.03	7.615	10.54	9.905	8.618	10.18	10.02	10.56	9.564	9.087	10.27	10.51	10.54	10.26	10.78	10.51	0.293347	0.135445	0.646235	0.879726	0.0662163	0.0897958	0.521844	0.795023	0.369847	0.621706	0.330288	0.793205	0.989854
Selplg	10.16	9.271	10.17	9.445	9.468	9.377	8.7	9.762	9.514	9.34	9.773	8.948	9.773	9.455	8.741	9.996	10.18	10.1	8.977	9.78	9.43	8.185	9.651	10.24	8.91	9.433	9.226	9.326	10.22	8.858	9.518	10.17	9.624	10.47	10.35	10.18	0.28728	0.837605	0.206735	0.866644	0.024385	0.0164539	0.52319	0.137106	0.385672	0.620187	0.936184	0.470573	0.985995
Ttk	3.17	4.524	4.17	3.459	3.322	3.459	3.585	3	3.459	3.322	3.17	3.585	5.285	3.459	3.807	3.907	3.459	3.459	3.807	3.322	3.17	5.858	3.322	3.585	3.807	3.907	3.7	3.807	3.7	3.907	3.7	3.907	3.907	3.7	3.907	3.807	0.309051	0.512042	0.0994977	0.902858	0.943923	0.95875	0.524205	0.607341	0.253486	0.63012	0.721379	0.343872	0.989854
Sptbn1	12.78	12.27	12.69	13.01	12.82	12.94	12.66	12.81	12.84	12.96	12.92	12.5	12.52	12.78	11.58	12.92	12.79	13.15	12.8	12.88	13.1	12.67	12.99	12.95	12.67	12.68	12.82	12.99	12.82	12.73	13.12	13	13.16	12.88	12.82	13.08	0.851095	0.424194	0.325412	0.479849	0.486281	0.165513	0.527156	0.292417	0.0970204	0.945592	0.639339	0.601181	0.939132
Mx1	7.257	7.833	9.022	6.524	7.5	7.435	6.883	6.585	6.794	7.087	6.508	7.17	9.629	6.585	7.2	5.644	6.426	7.119	7.539	6.629	7.055	9.695	6.658	6.966	6.858	6.833	7.219	6.392	7.484	8.435	6.304	6.022	6.524	8.604	3.907	6.858	0.212978	0.412656	0.662342	0.714223	0.0865766	0.171489	0.528413	0.511775	0.202628	0.54469	0.629708	0.796982	0.985995
Mob3c	6.714	6.644	6.931	7.087	6.833	6.845	7.16	7.055	7.331	7.295	7.19	6.7	7.451	6.977	3.807	7.044	7.409	7.267	6.409	7.375	6.858	6.794	7.15	7.033	6.87	7.077	7.022	7.022	7.2	6.209	7.2	6.87	6.794	7.435	7.257	6.858	0.431241	0.604983	0.196377	0.917737	0.707995	0.633082	0.528473	0.528905	0.211905	0.724328	0.794378	0.459982	0.991635
H2-Ob	7.629	7.937	8.362	8.175	8.811	8.285	8.388	7.96	8.758	8.969	9.362	8.683	8.322	7.748	9.299	8.281	7.011	7.19	8.618	7.877	8.768	7.7	9.347	8.966	9.172	8.589	8.426	8.185	8.555	8.804	7.931	7.547	7.248	6.966	3.907	7.983	0.294298	0.626025	0.129029	0.869126	0.0012616	0.000801879	0.528961	0.0388942	0.138936	0.621706	0.808245	0.368122	0.985995
Cdkn1a	10.92	10.08	10.61	9.987	10.13	10.46	9.394	9.695	9.506	8.904	9.077	8.907	9.562	9.607	9.877	9.662	10.44	10.84	9.776	11.77	9.679	9.767	9.292	10.33	9.585	8.574	8.842	9.62	10.12	8.798	10.73	10.15	10.51	10.64	10.24	10.3	0.000889227	0.237886	0.019322	0.00914181	0.292675	0.000542974	0.533119	0.1179	0.335902	0.0624883	0.454546	0.202605	0.28567
Retnla	10.39	11.44	10.74	10.01	9.468	9.926	11.23	10.11	10.18	9.003	9.299	10.59	10.18	9.867	10.87	9.558	9.514	9.288	10.67	10.55	10.02	10.25	9.896	9.709	10.45	10.23	10.5	9.535	10.25	9.841	10.22	10.52	10.19	10.31	10.03	9.653	0.284217	0.0691904	0.434511	0.84156	0.905279	0.935482	0.534661	0.222193	0.541382	0.616664	0.225714	0.69788	0.985995
Tspan7	13.01	12.46	12.72	12.48	12.66	12.71	13.19	12.13	12.26	12.47	12.31	12.77	12.29	12.37	10.53	12.34	12.3	12.55	12.85	12.35	12.86	12.99	12.65	12.82	13.32	12.49	12.6	12.61	12.78	13.04	12.73	12.39	12.8	12.2	12.4	12.6	0.518134	0.0131041	0.057027	0.819718	0.322305	0.225815	0.536698	0.259692	0.60458	0.807452	0.0991587	0.263257	0.985995
Ear3	7.852	8.224	8.405	9.529	8.88	8.331	8.585	10.03	9.651	9.765	10.3	8.618	9.5	9.155	3.807	9.82	9.394	9.127	8.114	9.549	8.948	7.358	9.082	8.91	8.555	9.822	9.226	9.591	8.611	8.69	8.451	9.555	9.246	9.066	9.736	9.498	0.125567	0.90932	0.101194	0.491496	0.331436	0.773461	0.539472	0.441973	0.171523	0.430684	0.95538	0.343872	0.945704
Cd180	7.468	7.19	6.907	7.238	7.762	7.331	7.592	7.484	7.585	8.066	8.185	7.794	7.562	7.119	8.353	7.119	6.687	6.443	8.229	6.524	8	7.409	8.317	8.022	8.577	8.322	8.022	7.555	7.384	7.524	6.931	6.687	6.883	6.392	3.907	6.672	0.21047	0.782191	0.129394	0.690648	0.000261895	8.35e-05	0.539831	0.0108387	0.044997	0.540158	0.924522	0.368122	0.985995
Usp18	6.845	7.426	6.82	6.375	6.687	6.15	6.672	6.066	6.19	6.34	5.954	6.658	6.728	6.358	3.807	5.977	6.17	5.615	7.331	6.109	6.087	7.109	6.109	6.409	6.907	6.066	6.426	6	6.524	6.755	6.022	6.087	6.087	5.907	3.907	6.322	0.283723	0.0161104	0.156482	0.831747	0.0375899	0.0593245	0.539952	0.794361	0.723654	0.616664	0.1075	0.407298	0.985995
Klf10	7.977	7.937	7.983	8.195	8.061	8.119	8.017	8.234	8.472	8.093	8.011	8.488	8.285	7.96	9.028	8.375	8.098	8.864	7.989	8.665	8.087	7.7	7.814	8.15	7.672	7.801	8.214	8.375	8.267	8.214	8.362	8.861	8.418	8.651	8.29	8.129	0.320293	0.030592	0.219139	0.894572	0.0327769	0.0438847	0.540026	0.982662	0.554367	0.637068	0.146762	0.483956	0.989854
Spry2	9.362	9.101	9.39	8.948	9.071	9.285	9.219	8.861	8.83	8.916	8.989	9.447	8.785	8.827	7.954	8.83	8.804	8.814	9.093	9.167	9.439	9.747	9.43	9.248	9.071	8.775	9.003	8.87	9.369	9.394	9.02	8.969	8.994	9.162	9.071	8.778	0.302152	0.000851131	0.0129132	0.0633147	0.0179384	0.571416	0.540318	0.407492	0.154529	0.624633	0.0273725	0.189566	0.372202
Nfatc2	6.34	6.322	6.895	6.15	5.781	6.781	6.539	6.229	5.931	6.322	6.087	6.17	6.044	6.15	8.15	5.833	6.229	6.845	6.82	5.644	6.19	6.304	6.248	6.6	6.615	6.57	6.459	6.109	6.585	6.109	6.585	5.883	6.17	5.615	3.907	5.728	0.601564	0.604855	0.301615	0.735238	0.0451709	0.0211082	0.543474	0.0745236	0.0196044	0.860277	0.794378	0.577311	0.985995
S100a4	11.22	10.48	10.14	9.902	10.49	10.22	10.47	10.61	10.18	10.97	10.88	10.98	9.907	9.716	10.33	9.825	10.13	9.541	10.28	10.2	10.33	10.57	10.31	10.9	10.69	10.77	10.66	9.817	11.01	10.25	9.127	9.466	9.723	9.545	9.543	9.635	0.177958	0.0167399	0.000463485	0.613231	5.27e-05	1.2e-05	0.544158	0.139591	0.373769	0.496658	0.109706	0.0680395	0.98028
Gata2	10.54	9.537	10.04	10.29	10.49	10.4	10	9.847	9.893	9.993	9.956	9.814	9.752	10.01	7.516	10.16	10.23	10.35	9.989	10.62	10.33	9.901	10.18	10.3	10.36	10.02	9.812	10.33	10.28	10.14	10.46	10.06	10.52	10.13	10.17	10.51	0.281679	0.0539196	0.37148	0.818986	0.748405	0.583258	0.545397	0.109999	0.309423	0.616005	0.200992	0.639006	0.985995
Zfp148	8.455	8.209	8.87	8.718	8.371	8.476	8.422	8.755	8.748	8.849	8.765	8.248	8.898	8.577	8.901	8.823	8.725	8.804	8.48	8.655	8.622	8.028	8.64	8.607	8.331	8.6	8.669	8.651	8.633	8.18	8.714	8.83	8.849	8.839	8.992	8.655	0.372266	0.0398885	0.22485	0.966687	0.0209498	0.0230849	0.546082	0.840605	0.422294	0.68653	0.169771	0.489666	0.997825
Sele	3.17	3.7	4.392	3.459	3.322	3.459	3.585	3	4	4.459	3.585	4.644	5.322	3.322	3.807	3.459	3.459	3.459	3.807	3.17	3.17	3.807	3.7	3.585	3.807	4	3.7	3.807	5.459	3.907	3.7	3.907	4.585	5.044	3.907	3.807	0.368971	0.499957	0.820339	0.0862	0.0652397	0.890373	0.547723	0.391987	0.79641	0.68653	0.713946	0.892331	0.424636
Il6	3.585	3.7	3.17	3.459	3.585	4.322	3.585	3	3.459	3.322	2.807	3.585	4.524	3.322	3.807	3.459	3.459	3.459	3.807	4.087	4.644	3.807	5.426	4.459	3.807	3.907	3.7	3.807	3.7	3.907	3.7	3.907	3.907	5.392	3.907	3.807	0.195325	0.894234	0.154964	0.0366632	0.309688	0.259098	0.548081	0.415652	0.8291	0.519451	0.949881	0.40478	0.28567
Ros1	3.17	4.585	5.087	4.807	4.524	4.755	3.585	3.907	4.858	4.248	4.087	4.755	5.585	4.524	3.807	4.755	3.459	4.17	3.807	4.392	4.087	3.807	3.907	4.585	3.807	4.7	3.7	4.807	3.907	3.907	3.7	5.209	5.129	4.858	3.907	3.807	0.466912	0.758	0.673278	0.90504	0.323863	0.384478	0.549004	0.360225	0.749088	0.764985	0.912085	0.80225	0.989854
S100a10	11.63	12.06	11.63	11.45	11.6	11.61	11.47	11.51	11.3	11.31	11.42	11.76	11.36	11.44	11.74	11.36	11.13	11.57	11.54	11.48	11.46	12.12	11.37	11.66	11.52	11.26	11.38	11.45	11.58	11.88	11.36	11.47	11.54	11.32	11.51	11.32	0.12102	0.0786573	0.824317	0.466324	0.153694	0.474256	0.549362	0.803139	0.72583	0.429794	0.236617	0.892403	0.935534
Cx3cr1	7.629	7.658	7.14	7	7.276	6.672	7.34	7.119	7.276	7.794	7.644	7.531	6.768	6.409	3.807	6.476	6.066	5.907	7.966	5.977	7.794	7.994	7.96	8.011	7.937	8.066	7.539	7.098	7.401	6.845	6.476	6.285	6.807	6.209	3.907	6.476	0.60357	0.00369179	0.000910121	0.74953	0.000678324	0.00163071	0.553686	0.65826	0.880077	0.860277	0.0513711	0.0823812	0.985995
Fpr1	7.644	6.267	7.358	6.714	6.658	6.476	5.728	6.728	5.977	6.19	6.794	6.248	7.622	7.19	3.807	7.728	7.476	7.248	7.022	7.229	6.392	5.781	6	7.451	5.426	6.34	6.34	6.248	7.665	6.714	6.476	7.781	7.109	8.011	8.29	7.665	0.215713	0.986675	0.221746	0.678837	0.054466	0.0216812	0.554266	0.164221	0.414856	0.547867	0.989086	0.484408	0.985995
Havcr2	5.555	6.555	6.022	5.248	5.931	5.858	5.833	6.17	5.977	5.728	5.807	6.066	6.17	6.044	3.807	5.555	5.728	6.17	5.907	6.229	5.492	5.931	5.524	6.17	6.129	6.022	6.209	5.907	6.781	6.57	3.7	6.209	6.066	6.209	3.907	6.358	0.860503	0.47142	0.371738	0.316846	0.236816	0.0334765	0.556826	0.738178	0.358852	0.945592	0.681147	0.639006	0.793738
Aoah	5.17	5.17	4.954	3.459	4.248	3.907	4.585	4.087	3.907	4.524	4	5.044	4.644	3.7	3.807	4.087	3.459	3.7	3.807	4.248	3.17	3.807	4.248	4.644	3.807	4.755	3.7	3.807	4.644	3.907	3.7	4.954	3.907	3.7	3.907	3.807	0.664672	0.0520245	0.123747	0.691703	0.97679	0.713207	0.557799	0.157364	0.398507	0.875342	0.197855	0.357598	0.985995
Birc2	9	8.823	9.212	8.801	8.94	8.96	8.931	8.833	8.907	8.974	8.775	8.913	8.644	8.895	8.986	8.676	8.778	9.053	8.82	9.063	9.017	9.17	8.919	9.217	8.801	8.752	8.989	8.768	9.008	8.974	8.966	8.6	8.925	8.867	9.238	8.807	0.513903	0.257411	0.625348	0.144197	0.197782	0.856869	0.558099	0.909424	0.636461	0.805994	0.479543	0.784959	0.545569
Cxcl16	8.697	8.916	8.928	9.484	9.082	8.765	8.592	9.706	9.568	9.6	9.814	8.48	9.382	9.428	7.994	9.562	9.56	9.377	8.687	9.723	9.226	7.839	9.478	9.379	8.589	9.267	9.394	9.646	9.292	8.611	9.02	9.531	9.506	9.5	9.653	9.656	0.277024	0.408125	0.790648	0.786182	0.147544	0.234873	0.560275	0.650852	0.303671	0.616005	0.626703	0.873755	0.985995
Smarcd3	6.794	6.977	7.022	6.931	6.672	8.2	7.011	6.555	6.714	6.87	6.87	7.15	6.807	6.492	10.13	6.87	6.129	6.57	7.15	6.426	6.919	7.248	6.954	6.476	7.119	6.989	6.989	7.022	7.022	6.833	6.781	6.229	6.304	6.714	3.907	6.629	0.598767	0.881842	0.500594	0.767226	0.0955521	0.0522751	0.561394	0.196045	0.0655161	0.860277	0.949881	0.737956	0.985995
Cd1d1	8.317	7.607	7.629	7.87	7.693	8.114	8.028	7.768	8.077	8.276	8.195	7.858	8.061	8.17	9.699	7.607	7.983	7.665	8.248	8.061	8.15	8.2	8.439	7.96	8.335	8.6	7.877	7.977	8.313	7.864	7.801	7.977	7.937	8.071	8.114	7.728	0.457185	0.139944	0.452154	0.943652	0.276463	0.307981	0.564276	0.0731214	0.213	0.752407	0.336782	0.711841	0.993829
Fscn1	8.243	8.317	7.877	7.577	7.877	8.022	7.913	7.077	6.7	6.858	6.833	7.807	7.768	7.304	8.285	7.19	7.229	7.539	8.455	7.468	7.775	8.401	7.468	7.622	7.977	6.728	6.794	6.741	7.775	7.7	7.707	6.954	7.895	7.721	7.313	7.384	0.0041201	0.0988868	0.17363	0.0299093	0.157011	0.416157	0.566765	0.86046	0.690639	0.120966	0.271846	0.432015	0.28567
Slc16a6	6.392	6.066	6.943	6.19	6.022	6.358	6.129	6.129	6.109	5.954	6.459	6.358	6.322	6.248	7.672	6.15	6.644	7.119	6.087	6.267	6.209	6.066	6.555	7.476	5.644	6.129	5.459	6.229	6.977	6.19	6.585	6.794	6.15	6.943	7.011	7.077	0.575199	0.147496	0.048602	0.176823	0.205821	0.0117693	0.568453	0.892278	0.663046	0.840951	0.344784	0.249844	0.601536
Rasgrf2	9.042	9.003	8.98	9.152	9.292	8.665	9.264	9.003	8.992	9.079	9.09	9.022	8.873	9.082	7.331	9.055	9.006	8.801	9.145	9.098	9.51	9.147	9.197	9.375	8.901	9.103	9.333	9.335	9.017	9.197	9.18	9.358	9.288	8.886	9.008	9.09	0.778508	0.0841821	0.0470202	0.602517	0.556548	0.946036	0.570984	0.406961	0.167393	0.908466	0.246174	0.24906	0.98028
Hpgds	3.322	5	3.7	4.322	3.459	4.322	5.087	4.322	4.087	4.524	4.585	4.248	2.807	3.585	3.807	3.907	3.459	3.907	3.807	4.087	3.807	3.807	5.044	3.907	3.807	4.807	4.907	3.807	4.524	3.907	5.285	4.644	3.907	3.7	3.907	3.807	0.13184	0.142413	0.00457945	0.466492	0.656854	0.774771	0.571013	0.176998	0.0596475	0.436398	0.33832	0.134694	0.935534
Pdgfra	10.45	10.14	10.37	10.57	10.42	10.33	10.32	10.67	10.6	10.71	10.79	10.23	10.46	10.45	8.901	10.6	10.26	10.51	10.03	10.82	10.75	10	10.87	10.71	10.37	10.55	10.75	10.94	10.39	10.22	10.76	10.71	10.7	10.65	10.27	10.51	0.406989	0.381199	0.0936287	0.974418	0.736561	0.760807	0.571772	0.391955	0.159854	0.711235	0.599144	0.336813	0.997825
Tlr5	5.883	6.555	6.585	6.17	6.229	6.285	6.109	5.459	5.7	5.883	6.109	6.15	6.57	6.19	3.807	5.858	6.392	6.409	6.044	6.022	6.209	7.011	6.426	6.459	6.585	6.066	6.109	6.17	6.19	6.109	5.858	6.285	6.392	6.476	7.313	6.524	0.182829	0.151148	0.913818	0.580426	0.69083	0.344371	0.573993	0.194978	0.455298	0.502609	0.347775	0.943379	0.98028
Gk5	5.907	5.248	5.459	5.087	5.977	5.858	5.7	5.459	5.585	5.7	5.833	5.883	5.492	5.17	3.807	5.755	5.672	5	5.585	5.672	5.392	6.248	5.7	5.644	6.129	6.066	5.977	5.755	6.109	6.285	6.229	5.129	5.392	5.322	3.907	3.807	0.73293	0.155088	0.0812559	0.259749	0.0196264	0.00105382	0.574043	0.484095	0.211207	0.884879	0.353524	0.311475	0.738094
Casp1	7.459	7.248	7.426	7.238	7.238	7.375	7.14	7.637	7.607	7.707	7.889	7.443	7.409	6.943	8.15	7.229	7.248	7.087	6.919	7.229	7.119	6.977	7.644	7.468	6.833	7.629	7.547	7.16	7.539	7.238	6.714	7.257	6.672	6.966	7.555	7.055	0.185551	0.93902	0.211183	0.582909	0.293042	0.114259	0.576359	0.423653	0.807245	0.50476	0.96735	0.474032	0.98028
Lamb2	9.972	9.828	9.959	10.13	9.945	10.09	9.96	9.951	10.02	10.03	9.993	10.12	10.05	10.12	10.34	10.18	9.945	10.17	10.16	10.19	10.16	9.945	10.08	9.944	10.17	9.883	10.01	10.22	9.964	9.97	10.29	10.09	10.25	10.12	9.932	10.08	0.774031	0.0987687	0.167921	0.616508	0.588669	0.300698	0.577799	0.420418	0.801214	0.906122	0.271846	0.424293	0.98028
Prdx3	9.127	8.928	9.162	9.441	9.36	9.443	9.243	9.629	9.574	9.662	9.683	9.19	9.522	9.587	11.46	9.557	9.401	9.295	8.986	9.704	9.388	9.17	9.5	9.369	9.347	9.702	9.585	9.64	9.373	8.91	9.276	9.478	9.301	9.474	9.664	9.324	0.272733	0.019162	0.18597	0.748742	0.770881	0.976752	0.578889	0.134087	0.33611	0.616005	0.117207	0.447547	0.985995
Il9	3.17	3.7	3	3.459	3.322	3.459	3.585	3	3.459	3.322	2.807	3.585	4.954	3.322	3.807	3.459	3.459	3.459	3.807	3.17	3.17	5.7	3.322	3.585	3.807	3.907	3.7	3.807	3.7	4.907	3.7	3.907	3.907	3.7	3.907	3.807	0.847838	0.205848	0.147413	0.559203	0.924418	0.624274	0.583353	0.404094	0.171274	0.945592	0.408359	0.392592	0.98028
Tgfbr3	9.335	9.085	9.19	9.7	9.697	9.791	9.524	9.804	9.916	9.989	9.679	9.095	9.765	9.785	9.713	9.856	9.768	10.11	8.96	9.607	9.644	9.047	9.531	9.366	9.594	9.819	9.932	9.94	9.288	9.527	10.09	9.79	9.959	9.904	9.747	9.535	0.209386	0.0263	0.302027	0.0475477	0.00469134	0.334362	0.585134	0.618562	0.961457	0.539261	0.138062	0.577311	0.326168
Cdh2	7.109	7.295	6.895	7.15	7.011	7.484	7.248	6.426	6.672	7.119	6.658	7.426	6.658	6.7	8.285	6.476	7.077	6.954	7.238	6.392	7.349	8.414	7.109	7.295	6.919	6.833	6.508	6.845	7.257	6.87	7.033	6.392	6.755	7.384	7.257	6.833	0.364031	0.603801	0.6942	0.100182	0.166877	0.782367	0.588771	0.533382	0.933932	0.686301	0.794378	0.815269	0.474408
Cdh1	11.04	11.29	11.68	11.59	11.29	11.15	11.12	11.42	11.4	11.27	11.32	11.3	11.41	11.47	9.877	11.56	11.37	11.4	11.33	11.6	11.34	10.74	11.45	11.31	10.79	11.17	11.19	11.45	11.14	10.94	11.29	11.57	11.57	11.41	11.54	11.44	0.855547	0.411126	0.520776	0.347975	0.365711	0.070683	0.590357	0.224851	0.0843685	0.945592	0.628681	0.737956	0.81966
Sema4b	6.17	6.426	6.524	6.57	6.629	6.943	6.17	6.409	6.322	6.6	6.585	6.585	6.833	6.687	8.033	6.7	6.687	6.7	6.672	6.358	6.919	6.539	6.714	6.7	6.615	7	6.687	6.728	6.459	6.615	6.508	6.87	6.807	6.741	7.14	6.629	0.571014	0.0279447	0.00713385	0.84611	0.448056	0.571014	0.590796	0.285791	0.11322	0.839928	0.141523	0.138087	0.985995
Dusp6	11.1	10.23	10.62	10.52	10.57	10.83	11.02	10.71	10.65	10.54	10.47	10.89	10.44	10.61	9.315	10.34	10.47	10.49	10.45	10.66	10.78	10.49	10.72	10.71	10.58	10.57	10.72	10.35	10.42	10.84	10.5	10.29	10.54	10.24	10.26	10.29	0.673653	0.029069	0.0107253	0.734509	0.0894048	0.168262	0.591268	0.708281	0.364491	0.875342	0.142629	0.174941	0.985995
Ccl2	5.17	5.426	5.492	5	5.524	5.883	5.17	5.129	5	4.392	4.755	5.459	5.755	5.285	7.728	4.585	5.285	5.524	5.954	5.087	5.285	6	6.022	5.209	5	4.644	6.585	5.615	5.459	5.555	5.907	6.022	6.209	6.409	7.077	3.807	0.302956	0.505222	0.09497	0.77932	0.454256	0.306087	0.592564	0.953183	0.633525	0.624633	0.720035	0.336813	0.985995
Irf1	9.925	9.842	9.838	10.13	10.04	9.934	9.947	9.914	10	10.23	10.02	9.902	10.12	10.19	8.811	10.24	10.19	10.29	10.08	10.58	10.24	9.628	10.32	10.03	9.778	9.963	10.51	10.19	10.09	9.811	9.901	10.32	10.47	9.937	10	9.959	0.785792	0.906016	0.877743	0.632226	0.794733	0.82659	0.596017	0.789155	0.792073	0.915301	0.95538	0.920837	0.98028
Was	6.931	5.807	6.476	5.807	6.304	5.977	6.109	5.883	6.022	6.087	6.57	6.19	6.459	5.807	3.807	6.109	6.358	6.044	6.524	5.931	6.15	3.807	6.508	6.895	6.087	6.409	6.392	5.644	6.672	6.15	6.267	6.392	5.781	6.714	3.907	6.358	0.868296	0.310643	0.394528	0.56375	0.881625	0.468631	0.599299	0.538123	0.927535	0.945592	0.526587	0.664098	0.98028
Tlr9	5.426	5.044	5.781	5.492	5.555	5.358	5.392	5.858	5.755	6.19	6.267	6.044	5.833	5.322	7.044	6.17	5.858	5.858	5.858	5.7	4.954	3.807	6.285	6.34	5.728	6.15	5.833	5.129	6	5.426	5.524	5.644	5.781	5.044	3.907	6.022	0.171252	0.10194	0.777958	0.520793	0.619145	0.258198	0.599324	0.132038	0.317685	0.487205	0.277125	0.866497	0.962877
Myd88	7.19	7.14	7.531	7.484	7.285	7.044	7.17	7.607	7.401	7.687	7.637	7.14	7.516	7.585	3.807	7.87	8.17	8.017	7.459	8.267	7.276	6.714	7.651	7.426	7.109	7.459	7.672	7.267	7.209	7.209	7.459	7.585	7.679	7.827	8.114	7.443	0.695664	0.774359	0.499007	0.725699	0.595793	0.38025	0.600189	0.563776	0.274153	0.875342	0.921021	0.737956	0.985995
Cd80	7.077	6.229	7.295	5.858	5.492	6.524	5.977	6.17	6.129	5	6	5.833	6.728	6.15	7.2	6.087	7.313	6.989	5.7	7.468	5.977	3.807	5.728	7.492	5.17	5.555	5.392	5.7	7.665	5.555	5.672	7.276	5.931	8.313	7.728	7.15	0.269964	0.511206	0.0834553	0.707517	0.0579341	0.0253906	0.602406	0.36386	0.695439	0.616005	0.721379	0.312531	0.985995
Ccl22	6.6	7.539	6.943	7.19	6.57	6.539	7.276	7.011	6.845	6.044	6.907	6.845	7.331	7.129	3.807	6.895	6.954	7.366	6.989	7.313	6.476	6.248	6.87	6.845	7.672	6.858	7.16	6.7	7.384	6.209	6.615	7.313	7.539	6.943	6.87	7	0.84463	0.413693	0.532752	0.591793	0.506908	0.897746	0.604766	0.296989	0.594622	0.945592	0.629981	0.737956	0.98028
Fcgr2b	8.807	8.484	8.94	8.864	8.951	8.934	8.931	9.626	9.349	9.271	9.547	8.785	9.003	8.801	9.315	9.008	9.264	9.324	8.384	9.496	8.592	7.484	8.669	9.304	8.622	9.132	8.849	8.925	9.355	8.611	8.488	9.055	8.738	8.922	8.516	8.833	0.061872	0.193695	0.547728	0.239882	0.636771	0.476222	0.605509	0.551594	0.936666	0.351382	0.398122	0.73903	0.698704
Ccl3	5.931	5.248	6.57	4.585	3.907	5.248	5.555	4.755	5.426	5	4.585	5.931	5.977	3.807	3.807	5.285	4.807	4.858	5.907	4.907	4.755	5.858	5.728	5.426	5.833	6.17	5.087	4.524	4.907	3.907	3.7	5.358	4.755	5.954	3.907	3.807	0.928041	0.265984	0.305612	0.414437	0.0589568	0.266143	0.606413	0.563034	0.949296	0.974209	0.486936	0.581137	0.884094
Nos2	4.858	5.285	4.524	3.585	3.322	3.459	4.248	3.7	3.459	3.322	2.807	4.322	3.585	3.322	7.331	3.459	3.459	3.459	3.807	3.7	3.17	5.7	3.322	4.392	3.807	4	3.7	4	3.7	3.907	3.7	3.907	3.907	3.7	3.907	5.358	0.29678	0.889812	0.363919	0.746243	0.897673	0.651449	0.607164	0.850193	0.744418	0.621706	0.949881	0.632978	0.985995
Tfcp2	7.366	7.098	7.622	7.14	7.229	7.349	7.322	7	6.82	7.392	7.011	7.6	6.858	7.098	7.864	6.954	7.077	7.19	7.459	6.833	7.392	7.508	7.087	7.34	6.807	7.358	7.409	7.18	7.248	7.7	6.977	6.845	7.5	6.833	7.077	7.358	0.519655	0.456479	0.918803	0.935156	0.316983	0.280159	0.607775	0.853752	0.486417	0.807678	0.665522	0.94454	0.993829
Tap1	8.629	8.7	8.721	8.52	8.951	9.017	9.109	8.48	8.755	8.647	8.611	8.755	8.64	8.629	8.322	8.665	8.119	8.504	9.257	9.025	8.607	8.484	9.006	8.855	8.997	8.785	9.369	8.707	8.864	8.96	8.326	8.679	8.845	8.05	8.114	8.451	0.834426	0.0623577	0.0949868	0.605538	0.00292108	0.000716857	0.608129	0.36765	0.16197	0.945592	0.214885	0.336813	0.98028
Ctsl	8.299	8.405	8.558	9.058	8.718	8.665	8.409	8.864	8.852	9.098	8.937	8.14	8.943	8.811	9.514	8.972	8.731	8.867	8.155	8.748	8.755	7.858	8.916	8.371	8.358	8.934	8.948	9.098	8.665	8.214	8.877	8.738	8.577	8.886	9.055	8.768	0.598107	0.0659724	0.179752	0.216437	0.0705497	0.54616	0.609939	0.981529	0.593921	0.860277	0.223151	0.436881	0.656465
Vegfa	11.36	10.95	11.39	12.31	11.85	11.47	11.27	12.15	12.15	12.33	12.14	11.18	12.11	12.22	11.21	12.19	12.09	11.96	11.43	11.95	12.18	10.41	12.57	11.77	11.46	12.22	12	12.29	11.69	11.36	12.28	12.2	12.1	12.07	12.24	12.07	0.25267	0.140861	0.732218	0.664589	0.112228	0.240594	0.610573	0.931078	0.551763	0.596334	0.336782	0.838452	0.985995
Ptgs2	8.371	9.217	8.96	8.155	8.335	8.082	8.662	8.129	7.714	7.889	7.658	8.785	7.919	8.422	3.807	7.16	8.129	7.948	8.555	7.977	7.989	9.579	8.945	9.071	7.577	7.392	8.077	8	8.626	8.061	7.401	7.913	7.801	9.409	8.205	7.109	0.436348	0.0118253	0.068941	0.140047	0.149465	0.971304	0.611673	0.404934	0.184397	0.729565	0.0933309	0.292501	0.545569
Myc	7.087	7.6	7.129	6.555	6.209	7.592	6.7	6.524	6.375	5.954	6.508	7.119	6.794	6.833	8.353	6.524	6.209	7.066	7.426	6.845	6.57	7.248	6.6	6.375	6.87	6.426	6.714	6.022	6.858	6.714	6.615	6.443	7.18	6.883	3.907	6.022	0.167128	0.853852	0.228413	0.495255	0.0669778	0.236387	0.612259	0.235234	0.0948257	0.487205	0.93898	0.494558	0.945704
Lta4h	9.364	9	9.371	9.34	9.311	9.147	9.344	9.257	9.324	9.453	9.375	9.375	9.182	9.202	8.836	9.222	9.106	9.182	9.087	9.278	9.516	9.304	9.466	9.518	9.488	9.34	9.409	9.377	9.43	9.333	9.185	9.137	9.375	9.207	9.264	9.063	0.276212	0.144722	0.0139214	0.701111	0.0903682	0.0406691	0.613886	0.860047	0.742218	0.616005	0.341562	0.19728	0.985995
Yap1	11.5	11.96	11.27	10.65	11.09	11.09	11.41	10.34	10.41	10.55	10.59	11.69	10.43	10.52	10.26	10.38	10.31	10.46	11.77	10.55	11.26	12.53	10.75	11.15	11.5	10.59	10.81	10.72	11.25	11.7	10.75	10.63	10.77	10.56	10.64	10.69	0.114837	0.00251895	0.106926	0.370488	0.0175915	0.120374	0.617686	0.587058	0.964699	0.425707	0.0410869	0.350022	0.834166
Hspg2	10.2	9.765	10.04	10.29	10.05	10.17	9.707	9.611	9.692	9.783	9.613	9.667	9.809	9.672	10.39	9.656	9.459	10.08	9.887	9.914	10.14	10.04	10.05	10.25	9.783	9.476	9.847	9.785	9.775	9.7	10.01	9.655	10.03	9.757	9.508	9.728	0.00250449	0.0603203	0.191418	0.0149169	0.0400158	0.66805	0.619876	0.891993	0.528173	0.0904226	0.210864	0.457658	0.28567
Sp4	8.19	7.468	8.16	8.017	8.16	8.185	8.322	8.165	8.414	8.335	8.384	7.687	8.496	8.119	7.267	7.989	7.977	8.271	7.839	8.05	8.335	7.435	8.539	8.322	8.414	8.14	8.308	8.093	8.077	7.864	8.077	7.972	8.022	7.827	7.954	8.039	0.296785	0.954573	0.271865	0.725745	0.558011	0.351312	0.620634	0.707915	0.903826	0.621706	0.970439	0.546709	0.985995
Rgs6	7.665	7.109	7.322	7.555	7.349	7.57	7.5	7.539	7.34	7.426	7.229	7.484	6.919	7.033	3.807	7.066	7.375	7.6	7.651	7.257	7.755	7.858	7.629	7.555	7.109	7.044	7.384	7.622	7.585	7.524	7.129	7.285	7.651	7.17	7.459	7.577	0.979042	0.0209888	0.0223119	0.469716	0.470636	0.998791	0.62145	0.238583	0.0989436	0.990864	0.12525	0.207303	0.939132
Map2k4	8.468	7.96	8.134	8.676	8.313	8.358	8.262	8.551	8.566	8.718	8.604	7.994	8.919	8.504	8.986	8.629	8.748	8.672	7.954	8.728	8.405	7.943	8.611	8.615	8.185	8.574	8.6	8.731	8.34	7.96	8.527	8.562	8.322	8.637	8.443	8.679	0.402217	0.00967017	0.0659509	0.885826	0.330959	0.40578	0.621911	0.220852	0.458284	0.710271	0.0832813	0.284753	0.989854
Icos	5.644	5.248	6.285	4.524	5.524	5.129	5.492	5.555	5.426	5.555	5.248	4.858	5.833	4.954	3.807	5.087	3.459	4.755	5.492	5.954	5.524	5.858	5.285	5.728	5.833	5.585	5.931	5.285	6.209	6.15	5.524	5.907	5.585	5.672	3.907	3.807	0.910854	0.0289796	0.037224	0.558729	0.0873209	0.0248615	0.622142	0.713845	0.899205	0.968938	0.142629	0.2296	0.98028
Hdac6	6.209	6.728	6.807	6.022	6.492	6.15	6.741	5.459	5.755	6.087	5.644	6.768	6.358	5.644	3.807	5.807	6.443	6.267	6.615	5.807	6.322	6.907	5.833	6.426	6.508	5.672	6.209	5.954	6.426	6.755	6.229	6.229	5.954	6.19	3.907	6.087	0.388561	0.0772188	0.348252	0.863986	0.148012	0.199595	0.623273	0.809595	0.801831	0.695618	0.236161	0.622046	0.985995
Irf5	8.644	8.589	8.409	7.839	8.195	7.864	8.527	7.814	7.607	8.093	8.114	8.488	7.989	7.707	8.836	7.644	7.687	8.401	8.752	7.651	8.071	8.543	8.353	8.697	8.655	8.388	8.362	7.629	8.615	8.426	7.845	7.392	7.748	7.238	7.644	7.459	0.495387	0.333947	0.772629	0.995131	0.000944416	0.000928663	0.626071	0.0687581	0.0237055	0.791054	0.558353	0.864497	0.997849
Il1b	11.35	9.98	11.12	9.257	9.498	10.07	7.925	8.974	8.313	8.861	9.167	8.455	9.775	9.36	3.807	9.214	10.03	9.572	7.693	9.557	9.457	9.574	10.47	11.58	7.435	8.006	8.155	9.033	11.28	7.833	9	10.32	8.622	11.83	10.95	10.38	0.0338766	0.034985	0.988457	0.137135	0.525884	0.0378895	0.627835	0.052863	0.138003	0.279387	0.15563	0.994939	0.541168
Kalrn	8.34	8.077	8.039	7.366	7.755	7.807	8.234	7.658	7.651	7.852	7.658	8.066	7.562	7.562	7.044	7.516	7.295	7.925	7.937	7.098	7.714	8.755	7.484	7.839	7.895	7.607	8.093	7.672	7.735	8.375	7.801	7.827	7.913	7.592	7.555	7.607	0.823964	0.0438479	0.0700442	0.644736	0.655564	0.366671	0.629061	0.252348	0.502623	0.94204	0.175871	0.294523	0.98028
Ptgdr2	3.585	4.585	4.755	4.248	4.17	4.248	3.907	3	3.585	3.585	2.807	4.7	5.209	3.322	3.807	4.087	3.459	3.907	4.954	4	4.322	6.19	4.392	5.209	4.585	4.392	3.7	4.322	4.322	5.209	5.459	3.907	4.459	4.954	3.907	3.807	0.0710174	0.407679	0.311325	0.245713	0.239041	0.986346	0.631313	0.800263	0.464916	0.361349	0.626703	0.585929	0.710054
Fzd4	9.683	8.96	9.574	9.983	9.731	9.961	9.613	9.788	9.944	9.644	9.611	9.353	9.69	9.649	9.699	10.04	10.13	10.23	9.145	9.908	9.687	9.25	9.638	9.869	9.547	9.589	9.585	9.993	9.798	9.646	9.97	9.853	9.819	9.796	9.706	10.07	0.945437	0.0900773	0.102907	0.460271	0.0610942	0.241257	0.634677	0.892103	0.733831	0.984561	0.258268	0.344931	0.932855
Enc1	5.977	6.476	6.209	6.358	6.392	6.248	6.34	6.15	5.833	6	6.209	5.883	6.672	6.392	7.516	6.19	6.443	6.644	6.409	6.687	6.267	6.629	6.585	6.476	6.508	6.555	6.285	5.883	6.285	5.492	6.508	6.15	6.209	6.392	7.077	5.615	0.299842	0.0721783	0.00648722	0.093112	0.357897	0.430614	0.635295	0.0570318	0.144538	0.621706	0.228579	0.138087	0.449633
Tlr2	8.781	7.82	8.331	7.14	7.285	7.409	7.066	7.531	7.098	7.033	7.672	7.011	7.375	7.18	3.807	7.349	7.87	7.409	7.755	7.852	7.066	7.943	7.492	7.96	7.119	7.349	7.508	7.077	8.129	7.19	7.547	7.418	7.19	8.229	8.629	7.607	0.186362	0.0266089	0.337114	0.499711	0.825567	0.372293	0.639978	0.0811521	0.193292	0.50476	0.138283	0.614	0.946012
Irf8	7.392	7.665	7.735	7.735	7.607	7.219	7.651	7.794	7.966	8.134	8.214	7.707	7.983	7.768	7.392	7.687	7.077	7.313	7.839	7.7	7.977	7.276	8.082	8.185	8.379	8.379	8.214	7.96	7.877	7.735	7.87	7.57	7.913	7.87	7.358	7.762	0.0319954	0.888611	0.0232556	0.12483	0.452804	0.0259348	0.64057	0.664616	0.973264	0.273077	0.949881	0.210736	0.511872
Bcl10	8.655	7.901	8.405	7.954	7.972	8.017	8.103	8.484	8.353	8.185	8.276	8.18	8.459	8.375	8.185	8.308	8.683	8.362	7.839	8.2	7.901	8.224	8.384	8.418	8	8.061	8.229	7.907	8.267	8.604	8.219	8.371	8.418	8.867	8.752	8.14	0.441984	0.101152	0.369835	0.907356	0.0465401	0.0595599	0.643265	0.788297	0.465694	0.735637	0.276006	0.638726	0.989854
Alox15	5.322	3.7	3	3.459	3.322	4.322	4	3	3.585	3.322	2.807	4.248	4.322	3.322	7.672	3.459	3.459	3.459	3.807	3.17	3.17	6.87	3.807	3.585	3.807	4.248	3.7	3.807	4.17	4.807	3.7	3.907	3.907	5.087	3.907	3.807	0.537777	0.464993	0.182623	0.970369	0.978572	0.948968	0.643721	0.591535	0.320576	0.823358	0.674515	0.442393	0.997825
Cebpd	9.418	9.222	9.077	8.155	8.418	9.157	8.745	8.504	8.464	7.814	8.304	9.098	8.405	8.468	7.728	8.028	8.755	8.745	8.852	9.082	8.704	9.476	8.516	9.103	8.615	7.937	7.585	8.15	8.904	9.053	8.771	8.464	8.577	8.817	9.134	8.574	0.0984826	0.0320018	0.592407	0.0246629	0.352434	0.166823	0.645702	0.36515	0.176338	0.399514	0.146808	0.770969	0.28567
Il15	7.055	6.267	6.34	5.858	5.858	5.931	6.248	5.728	5.7	6.066	5.672	5.977	6.209	5.807	3.807	6.087	6.209	5.7	5.285	6	5.883	6.492	6.022	6.768	5.807	5.833	5.555	6.109	6.539	6.066	6.022	6.375	5.492	6.109	3.907	5.858	0.36793	0.106358	0.459606	0.798355	0.209963	0.314528	0.646041	0.788606	0.847968	0.68653	0.28285	0.71334	0.985995
Nr2f6	8.611	8.728	8.811	8.384	8.209	8.414	8.492	8.124	8.15	8.175	8.229	8.693	8.295	8.295	8.88	8.205	7.943	8.304	8.977	8.087	8.476	8.877	8.353	8.577	8.589	8.214	8.637	8.426	8.397	8.371	8.48	8.488	8.596	8.129	8.752	8.379	0.154407	0.173475	0.947381	0.427449	0.559595	0.831749	0.646389	0.574282	0.91748	0.476198	0.374501	0.9647	0.89899
H2-K1	12.56	12.34	12.58	13.07	12.98	12.95	12.9	13.19	13.41	13.26	13.23	12.51	13.24	13.14	12.81	13.18	13	12.98	12.78	13.36	12.99	11.55	13.22	13.01	13.08	13.17	13.29	13.13	13.03	12.41	12.86	13.36	13.34	12.97	12.84	13.09	0.117702	0.146424	0.905698	0.346628	0.226269	0.78233	0.647512	0.858189	0.780179	0.42937	0.343371	0.93829	0.81966
H2-D1	12.92	12.4	12.75	13.04	13.03	12.92	12.79	13.01	13.13	13.11	13.12	12.43	13.25	13.08	12.33	13.21	13.06	13.16	12.65	13.23	13.01	11.82	13.2	13.17	13.15	13.1	13.28	13.14	13.11	12.57	12.92	13.23	13.18	13.06	13.03	13.15	0.645781	0.37394	0.664511	0.274503	0.20141	0.848481	0.64997	0.777653	0.863476	0.875342	0.593755	0.798283	0.749016
Mapk14	9.844	9.278	9.647	9.39	9.333	9.615	9.377	9.524	9.583	9.714	9.658	9.566	9.591	9.504	9.82	9.484	9.43	9.437	9.557	9.281	9.6	9.388	9.803	9.873	9.482	9.437	9.775	9.472	9.697	9.524	9.522	9.576	9.86	9.679	9.765	9.725	0.638936	0.81255	0.81602	0.86379	0.354346	0.274112	0.650592	0.623624	0.347878	0.875342	0.928481	0.889983	0.985995
Vegfc	7.629	6.883	7.435	8.248	7.409	7.644	7.833	8.071	8.209	8.243	8.422	7.313	8.308	8.426	3.807	8.527	8.313	8.214	7.19	8.285	8.114	6.409	8.281	7.644	7.629	8.055	7.845	8.693	7.6	7.044	8.409	8.539	8.397	8.492	8.904	8.248	0.34552	0.907696	0.406811	0.752858	0.0977153	0.174594	0.65398	0.269485	0.124844	0.67093	0.95538	0.674643	0.985995
Acad10	6.304	6.229	6.248	6.358	6.426	6.358	6.375	6.17	6.57	6.57	6.57	6.629	6.34	6.209	3.807	6.19	5.672	6.524	6.492	5.781	6.539	7.044	6.022	6.17	6.672	6.768	6.794	6.728	6.285	6.807	6.807	6.34	6.209	6.285	6.87	6.129	0.560883	0.0606253	0.0164462	0.228917	0.719717	0.393662	0.654413	0.112642	0.246882	0.833292	0.210896	0.202605	0.672653
Col4a2	10.68	10.03	10.24	10.93	10.89	10.49	10.24	10.68	10.57	10.79	10.64	9.899	10.61	10.66	9.541	10.86	10.86	10.89	10.32	10.74	10.78	9.883	10.76	10.84	10.46	10.58	10.85	10.87	10.53	10.34	10.79	10.67	10.81	10.8	10.82	11.06	0.710177	0.89198	0.61229	0.795754	0.176194	0.270126	0.655968	0.384722	0.668889	0.880695	0.949881	0.783372	0.985995
Stat5a	8.401	8.077	7.907	7.555	7.794	7.788	8.098	7.313	7.331	7.679	7.672	8.071	7.814	7.5	8.64	7.508	7.492	7.651	8.455	7.492	8.071	8.496	7.827	8.109	8.405	8.022	7.807	7.607	7.801	8.18	7.707	7.18	7.331	7.401	7.2	7.229	0.245664	0.430397	0.703459	0.588214	0.000561612	0.00247516	0.656056	0.0395863	0.0141639	0.590371	0.644718	0.820154	0.98028
Golim4	8.344	8.109	8.476	8.574	8.388	8.57	8.344	8.17	8.29	8.326	8.262	8.124	8.238	8.267	8.69	8.353	8.472	8.48	8.488	8.322	8.512	8.426	8.375	8.414	7.989	8.313	8.155	8.281	8.262	8.229	8.633	8.451	8.665	8.322	8.397	8.29	0.109389	0.94623	0.096066	0.0294759	0.702655	0.0119951	0.657628	0.823951	0.506628	0.414999	0.96735	0.337806	0.28567
Ercc1	7.468	7.658	7.644	7.547	7.6	7.508	7.644	7.607	7.418	7.629	7.459	7.788	7.555	7.6	8.384	7.707	7.476	7.833	7.839	7.539	7.877	7.129	7.781	7.592	7.313	7.492	7.707	7.547	7.687	7.637	7.901	7.672	7.858	7.629	7.954	7.443	0.879532	0.160002	0.207752	0.6372	0.379491	0.181083	0.659515	0.70124	0.954412	0.953585	0.357073	0.470573	0.98028
Fbp1	3.17	3.7	3	3.459	3.322	3.459	3.585	3	3.459	3.322	2.807	3.585	2.807	3.322	9.281	3.459	3.459	3.459	3.807	3.17	3.17	3.807	3.322	3.585	3.807	3.907	3.7	3.807	3.7	3.907	3.7	3.907	3.907	6.248	3.907	3.807	0.925051	0.136091	0.114235	0.599882	0.222891	0.480852	0.661678	0.840978	0.524185	0.974209	0.330764	0.350022	0.98028
Stat5b	8.243	7.87	8.271	7.983	8.214	8.109	7.827	8.082	8.185	8.281	8.209	8.039	8.14	8.055	8.858	8.488	8.313	8.257	7.877	8.022	8.071	7.781	8.185	8.214	8.028	8.066	8.238	8.262	8.098	7.858	8.622	8.205	8.267	8.195	7.954	8.129	0.929455	0.0675554	0.0562075	0.597915	0.113501	0.281837	0.663054	0.852529	0.534996	0.974209	0.22437	0.262779	0.98028
Ctsd	12.79	12.44	12.61	12.64	12.59	12.56	12.67	12.82	12.72	12.78	12.98	12.59	12.77	12.76	13.28	12.9	12.65	12.45	12.57	12.87	12.73	12.32	12.77	12.82	12.72	12.89	12.79	12.93	12.79	12.45	12.4	12.77	12.71	12.77	12.83	12.78	0.198429	0.105432	0.726356	0.493934	0.800962	0.664474	0.663333	0.325497	0.579906	0.522143	0.28239	0.834343	0.945704
Rhoc	9.039	9.409	9.124	8.651	8.864	8.665	8.745	8.626	8.524	8.48	8.435	8.581	8.683	8.611	8.447	8.651	8.839	9.17	8.798	8.758	8.845	9.494	8.676	8.647	8.913	8.281	8.285	8.69	8.83	8.426	9.095	8.707	8.842	8.94	8.83	8.439	0.0152111	0.151851	0.280584	0.06021	0.694245	0.130568	0.665417	0.454185	0.750135	0.224153	0.347775	0.558127	0.362247
Gzma	8.504	8.496	9.157	8.384	9.042	8.658	8.7	8.34	8.842	8.418	8.607	8.392	8.672	8.388	3.807	8.331	7.629	7.349	7.948	8.581	8.592	7.16	8.823	8.409	9.353	8.811	6.883	8.524	8.983	7.864	8.7	8.858	8.405	8	7.687	8.05	0.757975	0.0121122	0.0251408	0.767188	0.951188	0.814254	0.669437	0.06319	0.144955	0.895132	0.0940021	0.211103	0.985995
Fabp4	10.84	8.833	8.362	7.707	7.687	10.31	9.745	7.607	9.15	9.262	8.488	8.907	8.362	10.05	12.56	8	9.656	7.349	9.735	9.433	8.476	11.75	9.304	8.977	10.31	10.85	7.672	8.2	10.25	7.119	8.64	7.954	7.524	9.87	8.849	7.109	0.896929	0.617829	0.530328	0.46646	0.0915169	0.323434	0.670901	0.122475	0.255552	0.962165	0.805483	0.737956	0.935534
Stat6	10.52	10.21	10.31	10.11	10.08	10.14	10.22	10.27	10.24	10.27	10.32	10.29	10.19	10.12	9.568	10.15	10.08	10.07	10.25	10.2	10.29	10.4	10.41	10.41	10.47	10.29	10.21	10.15	10.36	10.37	10.06	10.31	10.18	10.36	10.27	10.27	0.681121	0.0476835	0.0188685	0.85045	0.384765	0.494442	0.671772	0.410865	0.216479	0.875342	0.185183	0.202605	0.985995
Adamts9	7.443	6.954	7.384	7.907	7.443	7.401	7.011	7.531	7.219	6.728	6.6	6.322	7.508	7.658	3.807	7.426	8.155	8.335	7.714	9.209	7.721	6.794	7.077	7.435	6.833	6.57	6.375	7.285	7.484	6.57	7.622	7.629	7.728	7.492	7.077	6.476	0.281335	0.568039	0.607351	0.0994477	0.503727	0.315054	0.67363	0.944419	0.725063	0.616005	0.769143	0.780728	0.473991
Ctgf	12.23	12.26	11.82	11.65	12.13	12.52	12.66	12.31	12.35	11.94	11.82	12.55	11.64	12.12	11.19	11.67	12.22	11.99	11.62	11.69	11.82	12.66	12.02	12.08	11.83	11.67	11.79	12	12.68	12.26	12.26	11.74	12.1	12.53	12.52	12.25	0.375885	0.126956	0.0192785	0.766608	0.193135	0.310705	0.674877	0.0488626	0.0189949	0.68653	0.315884	0.202605	0.985995
Btk	7.948	7.16	7.858	7.285	7.6	7.607	7.592	7.331	7.443	7.547	7.994	7.82	7.524	7.119	7.516	7.2	7.16	7.229	7.409	6.966	7.693	7.129	7.972	8.028	8.087	7.707	7.877	7.238	8.119	7.637	6.931	7.129	6.895	7.055	3.907	7.2	0.895148	0.40469	0.335766	0.473753	0.00517925	0.000753351	0.67824	0.136879	0.060694	0.961989	0.624039	0.614	0.939132
Mrc2	7.119	7.322	7.375	7.426	7.304	7.044	6.954	6.508	6.409	6.229	6.392	7.066	6.858	6.768	3.807	6.768	6.267	7.022	7.901	7.18	7.539	7.077	7.304	7.229	7.304	6.687	7.044	6.687	6.87	6.741	7.18	6.807	7.19	6.931	7.358	6.476	0.0435765	0.00327844	0.289114	0.140861	0.241791	0.752955	0.678476	0.169664	0.33119	0.31358	0.0481275	0.567514	0.545569
Acot11	4.7	4.585	5.322	6.022	5.585	5.426	5.129	5.524	5.555	6.15	5.17	5.728	5.644	5.672	3.807	6.109	6.022	5.807	5.285	5.392	5.977	6.066	5.954	5.672	5.755	6.17	6.087	5.755	5.358	5.644	6.17	6.15	5.954	5.954	3.907	6.267	0.430761	0.487939	0.923887	0.835861	0.97811	0.857328	0.679772	0.636864	0.952482	0.724328	0.699506	0.947369	0.985995
Il1r1	9.338	9.326	9.085	9.114	9.34	9.098	9.306	8.748	8.672	8.798	8.928	9.167	8.811	8.752	8.476	8.704	8.592	8.644	9.335	9.074	9.353	9.51	9.288	9.192	9.362	8.788	8.977	9.031	9.137	9.16	8.658	8.577	8.811	8.69	8.539	8.697	0.0151205	1.64e-05	0.0175963	0.0563498	2.15e-06	0.000631539	0.680407	0.624321	0.369534	0.224153	0.00266254	0.202605	0.353511
Map2k1	9.222	8.904	9.297	9.182	8.916	9.185	9.042	9.349	9.371	9.248	9.401	8.937	9.243	9.246	9.514	9.127	9.09	9.308	8.948	9.34	9.17	8.496	9.355	9.589	8.983	9.278	9.25	9.214	9.295	9.053	9.185	9.347	9.388	9.301	9.609	9.246	0.426649	0.310304	0.822821	0.827661	0.149365	0.217531	0.681512	0.754258	0.47077	0.723235	0.526587	0.892403	0.985995
Irf7	6.15	5.728	5.728	5.833	5.954	5.459	5.807	6.066	5.883	6.375	6.524	5.209	6.229	6.375	3.807	6.585	6.392	5.931	5.426	6.672	5.7	3.807	6.044	6.304	5.931	6.392	6.209	5.883	6.585	5.426	6.129	5.907	5.672	6.109	3.907	5.807	0.688067	0.852872	0.828669	0.329604	0.866903	0.255069	0.681937	0.802911	0.510667	0.875342	0.93898	0.894807	0.814576
Gch1	6.109	6.443	5.7	5.392	5.492	5.426	6.129	6.044	5.907	5.883	6.044	6.304	6.392	5.833	3.807	5.524	6.022	5.492	6.15	6.322	5.833	6.358	5.248	6.285	6.768	5.755	5.883	5.977	6.19	6.209	5.459	5.954	6.17	6.109	3.907	5.977	0.385918	0.45879	0.113163	0.770246	0.197268	0.116955	0.682111	0.691154	0.990152	0.692577	0.666835	0.350022	0.985995
Tuba4a	10.27	10.21	10.09	9.508	9.539	10.4	9.555	9.428	9.306	9.364	9.541	10.14	9.285	9.394	12.41	9.297	9.344	9.52	9.858	9.5	9.814	10.24	9.674	9.904	9.736	9.2	9.366	9.466	9.928	9.752	9.5	9.351	9.598	10.05	9.543	9.468	0.181387	0.698672	0.336521	0.438067	0.456536	0.975007	0.683895	0.799008	0.509155	0.500518	0.864799	0.614	0.913469
Fut4	7.209	8.066	7.219	6.658	6.82	6.7	7.129	6.248	6.129	5.807	6.044	7.109	6.768	6.476	3.807	6.248	6.741	6.585	7.331	6.57	6.443	7.781	6.658	6.658	6.919	6.285	5.931	5.883	6.943	6.781	6.129	6.285	6.409	6.443	3.907	6.919	0.117557	0.0273573	0.486451	0.309698	0.0491108	0.318422	0.686305	0.851461	0.828199	0.42937	0.140421	0.729785	0.791431
Cd276	4.907	5.358	5.285	5.426	4.644	4.954	5.322	4.907	5.17	5.248	5.209	4.954	5.459	4.644	3.807	5.087	5.728	5.555	5.285	4.907	5.492	3.807	5.883	5.644	5.615	5.615	5.615	5.209	5.358	5.044	5.977	5.426	5.755	6	3.907	3.807	0.910716	0.888907	0.801251	0.49599	0.94469	0.453647	0.686677	0.960338	0.723483	0.968938	0.949881	0.880083	0.945704
Lgals3	5.044	5.248	5.555	4.392	5.285	4.755	5.044	5.129	4.322	5.17	4.17	5.322	5.555	4.087	7.119	4.524	4.644	4.7	5.129	5.087	4.322	6.409	4.524	5.17	5.129	4.807	5.524	4.7	5.087	5.555	5.907	5	5.087	5.17	3.907	5.459	0.621459	0.877371	0.517689	0.943406	0.960964	0.904543	0.689504	0.885725	0.587474	0.873853	0.949838	0.737956	0.993829
Tlr8	8.849	7.972	8.714	7.459	7.451	7.384	7.907	8.524	8.224	7.714	7.858	7.2	8.214	7.845	3.807	7.827	8.422	8.271	7.539	8.504	7.18	6.629	7.055	8.18	7.19	8.234	8.371	7.18	8.285	7.14	7.585	8.375	8.209	7.983	8.344	7.901	0.894537	0.260962	0.319712	0.665453	0.279469	0.511584	0.689562	0.122344	0.245117	0.961989	0.483329	0.594097	0.985995
Ldlr	9.535	9.109	9.362	9.43	9.226	8.986	9.129	9.222	9.285	9.106	8.883	9.382	9.063	9.229	8.353	8.637	8.778	8.833	9.29	9.214	9.416	9.377	9.435	9.426	9.129	9.392	9.285	8.877	9.165	9.267	9.366	9.407	9.331	9.292	9.264	9.187	0.371342	0.000471026	0.00534247	0.149925	0.662946	0.308241	0.690284	0.0202265	0.00767301	0.68653	0.0193219	0.13522	0.552989
Hist1h1c	10.39	10.43	10.53	10.45	10.7	10.78	10.39	10.99	10.9	10.88	11.23	10.66	10.66	10.59	11.27	11.19	10.78	11.26	10.3	10.68	10.82	10.29	10.63	10.88	10.76	11.09	10.85	11.54	10.8	10.84	10.94	10.64	10.44	10.77	11.05	10.94	0.0572768	0.00968052	0.441051	0.0161333	0.197862	0.229202	0.690421	0.316992	0.16575	0.350078	0.0832813	0.704199	0.28567
Fn1	11.46	10.82	11.04	11.39	11.19	11.32	11.09	11.17	11.31	11.28	11.29	10.83	11.03	11.11	11.91	11.24	11.23	11.64	10.96	11.24	11.26	10.47	11.38	11.55	11.04	11.28	11.31	11.37	11.33	10.85	11.54	11.04	11.34	11.19	10.69	10.92	0.807748	0.363174	0.251513	0.755518	0.891576	0.65471	0.695054	0.459051	0.260714	0.932548	0.589757	0.518569	0.985995
Adgre5	12.46	12.16	12.22	11.81	11.93	11.78	12.27	11.64	11.64	11.94	11.84	12.1	11.81	11.72	10	11.78	11.5	11.75	12.28	11.52	12.34	12.6	12.04	12.17	12.1	11.95	12.13	12.01	12.31	12.23	12.09	11.73	11.93	11.73	11.82	11.78	0.47154	0.00552509	0.0316008	0.864237	0.1527	0.205402	0.69668	0.293001	0.503984	0.769135	0.0645099	0.217955	0.985995
Gpr183	5.459	5.858	5.781	5.781	5.907	5.728	5.672	5.907	5.883	6.229	6.19	6.087	6.19	5.7	3.807	5.129	4.807	5.858	5.858	5.392	5.672	6.248	6.375	6.585	6.34	6.267	5.833	5.7	6.066	6.426	5.459	4.807	5.492	5.248	3.907	5.672	0.404487	0.0886192	0.0139763	0.772409	0.00293682	0.00135041	0.698286	0.307904	0.523497	0.710271	0.256088	0.19728	0.985995
Nox4	9.831	9.403	9.91	10.16	9.863	10.03	9.916	10.26	10.33	10.67	10.29	9.693	10.15	10.32	8.589	10.48	10.52	10.4	9.896	10.05	10.07	9.407	10.17	10.05	9.644	10.27	10.26	10.53	10.08	10.1	10.34	10.23	10.29	10.17	10.21	10.3	0.142281	0.34043	0.595116	0.348411	0.155523	0.618365	0.698412	0.732847	0.467521	0.448072	0.566611	0.771758	0.81966
Nod2	4.954	5.426	5.392	3.907	4.755	5.17	5.129	5.322	4.7	4.858	4.585	5.392	5.285	4.322	3.807	4.7	5.322	4.858	6	4.907	4.585	5.781	5.17	5.781	5.129	4.858	5.672	4.807	5.555	5.392	6.229	5.977	5.555	5.555	7.14	3.807	0.861382	0.550338	0.441323	0.711085	0.354496	0.198467	0.700057	0.283352	0.148712	0.945592	0.753634	0.704199	0.985995
Dusp2	6.907	7.077	7.607	5.672	7	7.2	6.87	6.304	6.794	5.907	7.14	7.295	5.931	5.426	3.807	5.285	5.755	6.426	6.409	6.508	6.629	7.044	7.15	7.781	7.524	6.919	6	6.322	7.392	7.531	6.687	5.644	5.672	6.066	3.907	6.267	0.640205	0.00102501	0.00360599	0.945933	0.00550352	0.00462217	0.704979	0.655731	0.946201	0.875342	0.0280195	0.13234	0.993829
Adora2a	3.7	3.7	4.7	4	3.807	3.459	4.17	3	4.392	3.322	3.7	4.858	4.524	3.459	3.807	4.322	3.459	4.585	3.807	4.322	3.907	3.807	4.17	4.087	3.807	4	4.858	3.807	4.7	3.907	3.7	3.907	4.954	3.7	3.907	3.807	0.964133	0.640769	0.673122	0.56345	0.941044	0.515033	0.705894	0.70218	0.448956	0.985495	0.820076	0.80225	0.98028
Sirpa	10.68	9.883	10.25	9.823	9.856	9.849	10.16	9.852	9.695	9.96	10.1	10.16	9.85	9.944	8.922	9.961	9.94	9.982	10.13	9.864	9.869	9.799	10.19	10.46	10.03	10.11	10	9.853	10.42	10.02	9.629	9.953	10.08	10.15	10.32	10.08	0.680065	0.0895557	0.19135	0.903949	0.920555	0.825602	0.706247	0.251805	0.43716	0.875342	0.25778	0.457658	0.989854
Ccr2	10.41	9.416	9.248	8.986	9.375	8.785	10.2	10.05	9.474	10.18	9.99	9.785	9.071	8.721	7.82	9.165	9.488	9.76	9.315	8.794	9.14	9.644	9.631	10.08	10.2	10.5	10.08	9.187	10.04	9.167	8.087	8.16	8.492	8.082	8.371	8.379	0.0451984	0.195264	0.00179502	0.131268	0.000180078	2.06e-06	0.707281	0.0474658	0.102158	0.316601	0.398122	0.0823812	0.523646
Cysltr1	6.044	6.044	6.19	6.087	6.15	5.585	6.524	5.977	6.066	6.322	6.209	5.883	6.443	5.672	3.807	5.524	5.728	6.087	6.229	5.977	6.322	3.807	6.585	6.476	6.267	6.267	6.248	6.358	6.375	5.954	5.907	5.954	5.954	5.555	3.907	5.728	0.698172	0.216483	0.108316	0.364104	0.296229	0.0560913	0.710605	0.888989	0.816735	0.875342	0.422602	0.350022	0.82998
Mafb	8.114	7.839	8.271	7.82	7.707	8.039	8.34	8.2	7.889	7.954	8.114	7.907	8.017	7.366	10.75	7.622	8.098	7.762	7.913	7.925	8.039	8.011	7.972	8.017	7.714	7.972	8.061	7.781	8.257	7.735	7.901	7.931	7.615	8.185	8.205	7.276	0.741417	0.329943	0.516212	0.847766	0.681516	0.826777	0.712192	0.328458	0.539512	0.884879	0.554184	0.737956	0.985995
Cd74	13.38	13.81	13.51	13.72	14.15	13.82	13.82	13.7	13.77	13.74	14.05	13.77	13.87	13.66	13.44	13.73	13.41	13.5	13.81	13.85	13.9	13.47	14.11	14.12	14.31	13.96	14.06	13.86	14.01	13.91	13.36	13.54	13.46	13.24	13.48	13.74	0.541491	0.303189	0.105987	0.2626	0.00256275	0.000109303	0.71382	0.12517	0.0606722	0.824594	0.522396	0.350022	0.738094
Fpr2	8.755	6.728	7.484	7.15	6.977	6.7	6.304	7.15	6.781	7.022	6.833	5.977	7.925	7.384	3.807	7.833	8.581	8.039	6.755	7.492	6.066	6.539	6.714	7.492	5.907	6.375	6.615	6.34	7.794	5.931	6.508	8.039	7.011	8.758	8.849	7.943	0.240828	0.942928	0.269806	0.506316	0.0612668	0.0136143	0.713936	0.164482	0.300223	0.582842	0.96735	0.544059	0.952938
Cd47	10.19	10.07	10.14	10.87	10.76	10.33	10.27	11.13	11.16	11.28	11.16	10.02	10.98	11.06	10.61	11.27	11.27	10.9	10.11	11.15	10.71	9.414	10.87	10.58	10.45	11.04	11.14	11.26	10.61	10.24	10.89	11.05	10.86	10.99	11.24	10.89	0.0757818	0.0149219	0.465685	0.197811	0.0410463	0.421523	0.715362	0.75538	0.957528	0.375383	0.107379	0.718545	0.636813
Klk1	3.7	4.585	4.644	3.585	4.392	3.585	4.585	3.459	4.392	4.17	4.644	5	5.358	3.907	3.807	4.17	3.459	3.7	3.807	4.907	3.7	3.807	3.907	4.524	4.392	4.858	3.7	4.17	4.7	5.555	3.7	4.644	3.907	3.7	3.907	3.807	0.349733	0.961573	0.325981	0.151599	0.598047	0.0539069	0.715463	0.734428	0.482863	0.673154	0.97351	0.601181	0.55637
Lpl	10.47	9.311	9.91	10.1	9.887	10.51	10.38	10.51	10.71	10.72	10.61	9.864	10.11	10.57	13.86	10.43	10.54	10.33	9.89	10.57	9.878	10.04	9.98	10.53	10.41	10.9	10.37	10.54	10.58	9.524	10.46	10.26	10.37	10.81	10.39	10.43	0.25596	0.0174061	0.185869	0.52839	0.422125	0.861574	0.715861	0.239363	0.411717	0.600489	0.112071	0.447547	0.969596
P2rx1	4.7	3.7	4.585	4.585	4.322	4.459	4.459	4.392	4.17	3.807	4.087	5.459	4.858	3.322	3.807	4.248	3.459	5.426	5.555	4	4.7	3.807	4.248	3.585	4.585	4.524	3.7	4	4.907	5.322	3.7	3.907	5.129	4.954	3.907	3.807	0.991563	0.572391	0.565274	0.600028	0.821471	0.454516	0.716059	0.80997	0.901692	0.994272	0.769143	0.750291	0.98028
Maff	9.226	9.478	9.025	7.687	8.257	8.801	8.669	8.2	8.124	7.468	7.622	8.775	8.234	8.077	7.459	7.87	8.562	8.994	8.626	8.814	8.414	9.776	8.14	8.362	8.109	7.322	8.103	7.96	9.25	8.804	8.931	7.768	8.19	8.986	8.516	7.954	0.0802556	0.111287	0.866947	0.205943	0.378591	0.693102	0.71779	0.60197	0.872188	0.380907	0.292596	0.914498	0.650074
Alox5ap	9.827	8.443	9.243	8.69	8.718	8.476	8.662	9.167	8.687	8.91	9.373	8.7	8.963	8.662	7.864	9.285	9.609	9.338	8.326	8.873	8.29	7.637	8.718	9.333	8.14	8.943	8.849	8.611	9.414	8.18	8.459	9.05	8.551	9.558	9.543	9.236	0.952521	0.85003	0.896903	0.576159	0.06729	0.193088	0.723484	0.237167	0.40285	0.984861	0.93898	0.933797	0.98028
Ell2	7.435	7.077	7.484	7.349	7.276	7.285	7.066	7.285	7.762	7.555	7.562	7.18	7.555	7.524	7.907	7.401	7.468	6.931	6.644	7.895	6.943	7.077	7.375	7.011	6.322	7.492	7.577	7.313	7.409	6.672	7.129	7.34	6.57	8.044	7.6	7.313	0.707505	0.51335	0.779433	0.90509	0.435675	0.369838	0.726645	0.928198	0.660391	0.880184	0.721837	0.866824	0.989854
Apoe	11.03	10.86	11.15	11.5	11.5	11.45	11.13	11.34	11.24	11.51	11.6	11	11.25	11.23	13.54	11.62	11.44	11.53	10.83	11.33	11.5	10.79	11.55	11.55	11.43	11.42	11.44	11.63	11.64	11.07	11.17	11.39	11.46	12.01	11.6	11.28	0.828785	0.0475122	0.0746015	0.480675	0.375613	0.854396	0.728338	0.417028	0.249622	0.942836	0.185183	0.304347	0.939132
Fcgr4	7.735	7.276	7.858	6.833	6.392	6.919	7.18	7.622	7.435	7.087	7.459	6.87	7.426	7.209	3.807	7.285	7.748	7.693	7.15	7.607	6.7	3.807	6.714	7.679	6.34	7	7.409	6.508	7.989	6.615	6.755	7.693	7.5	8.033	8.017	7.794	0.842778	0.568355	0.443228	0.496044	0.0642822	0.228373	0.731961	0.0875042	0.16606	0.945592	0.769143	0.705703	0.945704
Tnfaip3	8.658	8.443	8.728	7.994	8.05	8.295	8.326	8.271	8.455	7.931	8.551	7.977	8.006	7.901	7.331	7.919	8.134	8.248	8.044	8.464	8.508	8.308	8.873	8.607	8.14	8.16	8.066	8.15	9.116	7.931	8.379	8.006	8.055	9.267	8.735	8.409	0.589162	0.0365267	0.111377	0.310534	0.969111	0.292868	0.733916	0.126013	0.0646318	0.852948	0.160104	0.350022	0.791431
Klrk1	5.585	6.267	6.629	6.17	6.358	6.644	5.977	6.807	6.833	6.476	6.728	6.358	6.129	6.109	3.807	6.392	5.858	6.022	3.807	6.907	6.248	3.807	6.524	6.615	5.644	6.87	6.19	5.977	6.248	5.931	6.476	6.755	6.34	6.476	3.907	6.229	0.608288	0.266256	0.108943	0.32421	0.445979	0.819834	0.734568	0.187867	0.323043	0.860277	0.486936	0.350022	0.805331
Nr1h3	9.883	10.15	9.649	9.219	9.371	9.377	9.773	8.801	8.87	9.202	8.873	9.934	8.997	8.972	9.047	8.954	8.589	9.155	10.02	8.934	9.658	10.74	9.182	9.533	9.637	9.098	9.362	9.152	9.394	9.892	9.397	9.234	9.418	9.087	8.886	8.861	0.12419	0.00800629	0.22022	0.27886	0.0288277	0.243633	0.737848	0.705086	0.96499	0.429794	0.0816197	0.483956	0.758087
Psme2	10.83	10.55	10.72	10.94	10.83	10.76	10.69	10.85	10.9	10.87	10.95	10.54	10.97	10.84	10.62	10.81	10.55	10.64	10.76	10.99	10.98	10.34	11.16	11.01	10.9	10.96	11.01	10.86	10.82	10.53	10.6	10.82	11	10.66	10.77	10.74	0.808398	0.775464	0.598292	0.819459	0.356871	0.486068	0.739351	0.650292	0.903628	0.932548	0.921021	0.771786	0.985995
Rab20	7.852	7.954	7.852	7.539	7.409	7.313	7.238	7.375	7.409	7.285	7.443	7.484	7.925	7.919	7.622	7.989	7.748	8.248	7.539	8.331	7.672	7.679	7.555	7.852	7.238	7.524	7.577	7.913	7.895	7.219	7.845	7.492	7.768	8.098	8.175	7.913	0.0701484	0.0981698	0.0011351	0.170144	0.466303	0.0400527	0.741575	0.499301	0.317271	0.361349	0.271846	0.0823812	0.590083
Id1	11.69	11.02	11.23	11.46	11.56	11.55	11.39	11.68	11.73	11.43	11.54	11.82	11.2	11.11	9.807	11.41	11.28	11.45	11.25	11.54	11.47	11.23	11.47	11.52	11.28	11.21	11.5	11.89	11.56	11.62	11.87	11.39	11.59	11.78	11.66	11.23	0.320703	0.0433452	0.00390005	0.591769	0.33868	0.67034	0.743388	0.0371911	0.0175636	0.637068	0.175871	0.134694	0.98028
Cd247	5.459	5.977	6.022	5.392	5.555	5.781	5.7	5.555	5.954	5.492	6.066	5.358	5.781	4.7	7.2	5.644	5.672	5.248	6.15	5.781	6.022	6.443	5.907	5.931	5.615	6.087	6.304	5.672	5.555	6.109	5.977	5.322	5.492	5.672	3.907	3.807	0.973356	0.974229	0.947614	0.625915	0.0021364	0.00760613	0.747851	0.0231312	0.04743	0.989558	0.980911	0.9647	0.98028
Rapgef4	7.966	7.401	7.814	7.129	7.629	7.768	7.833	6.883	7.34	7.229	7.044	7.547	6.741	6.794	3.807	7.109	6.954	7.651	8.011	7.313	7.6	7.895	7.358	7.672	7.775	7.322	7.409	7.304	7.295	7.864	7.585	7.443	7.304	6.7	7.257	7.077	0.391357	0.00348438	0.0289646	0.679006	0.247364	0.452385	0.751697	0.171564	0.288436	0.69892	0.0501477	0.213718	0.985995
Tep1	8.6	8.281	8.721	8.683	8.5	8.778	8.527	8.335	8.304	8.581	8.665	8.468	8.422	8.464	8.858	8.358	8.344	8.459	8.798	8.326	8.721	8.2	8.752	8.913	8.697	8.392	8.392	8.48	8.596	8.811	8.596	8.468	8.622	8.295	8.175	8.687	0.374386	0.391911	0.973898	0.654951	0.261299	0.493628	0.752511	0.846675	0.611485	0.68653	0.610748	0.98735	0.985995
2900026A02Rik	8.418	7.889	8.443	8.299	7.877	8.665	8.087	7.994	8.234	8.209	8.05	7.775	8.375	8.257	8.64	8.392	8.271	8.738	8.426	8.14	8.435	8.124	8.234	8.543	8.205	7.814	7.983	8.114	8.451	8.464	8.607	8.662	8.801	8.43	8.317	8.439	0.142846	0.199946	0.00838017	0.299978	0.111294	0.011245	0.753048	0.817508	0.933043	0.448072	0.402083	0.146803	0.784475
Thbd	11.23	10.75	11.01	12.45	11.91	11.41	11.22	12.42	12.37	12.39	12.24	10.51	12.61	12.59	10.33	12.62	12.85	12.52	10.83	12.59	11.97	9.91	12.27	11.59	11.49	12.22	11.76	12.56	11.52	10.87	12.66	12.72	12.58	12.72	12.9	12.23	0.351034	0.0685924	0.355025	0.62122	0.012941	0.0406099	0.753739	0.600301	0.404043	0.673154	0.225109	0.630964	0.98028
Isg15	7.768	7.577	7.781	7.615	7.392	6.82	7.285	7.34	7.19	7.033	7.358	6.895	7.409	7.34	3.807	7	6.443	6.807	7.693	7.562	7.2	7.592	7.331	7.459	7.219	7.375	7.585	7.119	7.644	6.931	6.539	7.022	7.109	7.257	7.077	6.555	0.376001	0.00548567	0.0454535	0.643428	0.121911	0.270325	0.762791	0.332769	0.501977	0.68653	0.0645099	0.247914	0.98028
Serinc2	6.672	5.977	6.7	7.229	7.055	6.966	6.728	6.409	6.7	6.508	6.833	6.248	6.858	6.794	3.807	6.82	6.658	7.267	7	6.524	7.15	6.539	6.7	6.954	6.644	6.741	6.794	7.119	6.615	6.87	6.644	6.755	7.033	6.833	3.907	6.794	0.647826	0.353511	0.634218	0.973862	0.262597	0.276397	0.764063	0.889022	0.660479	0.875342	0.5779	0.785018	0.997825
Ccl9	10.06	9.435	9.437	8.916	9.234	8.877	9.492	9.651	9.274	9.464	9.679	9.101	9.466	8.833	10.06	9.008	9.725	9.753	9.435	9.662	8.801	8.877	9.058	9.768	9.264	9.447	9.472	8.886	10.12	8.472	8.285	8.768	8.344	9.152	9.347	8.527	0.642956	0.558895	0.903137	0.968341	0.0420205	0.0385254	0.76412	0.0644113	0.116579	0.875342	0.759858	0.93829	0.997825
Sell	11.79	10.87	11.36	9.961	10.49	10.32	10.14	10.18	10.13	10.47	10.71	10.36	10.52	10.11	10.17	10.59	10.73	10.88	10.33	10.31	10.29	10.83	10.89	11.36	10.46	10.21	9.919	9.819	11.22	10.25	10.01	10.23	9.615	11.09	10.89	10.65	0.0832879	0.261419	0.52369	0.183063	0.337623	0.700959	0.764618	0.905177	0.856798	0.380907	0.483329	0.737956	0.608
Tnfaip6	4.858	5.615	4.858	4.524	5.209	5.585	5.17	5.644	4.248	4.087	4.644	4.7	5.17	4.907	3.807	4.807	5.129	5.248	5.555	6.304	4.17	3.807	5.087	4.755	3.807	3.907	3.7	4.907	6.129	3.907	3.7	5.248	5.087	6.714	3.907	3.807	0.438845	0.569401	0.835712	0.2361	0.661613	0.449436	0.766466	0.925613	0.696457	0.732074	0.769143	0.894807	0.690427
Ptprb	11.68	10.78	11.55	11.73	11.65	11.44	11.69	11.63	11.87	11.87	11.76	11.21	11.72	11.72	9.898	11.82	11.74	11.77	11.1	11.74	11.83	10.56	11.69	11.86	11.8	11.7	11.8	12.01	11.7	11.59	11.78	11.79	12	11.51	11.72	11.8	0.418392	0.912563	0.359096	0.222786	0.222786	1	0.766483	0.345523	0.515272	0.717523	0.956888	0.632208	0.662045
Ccl6	9.718	9.017	9.375	8.555	8.655	8.331	8.849	9.255	8.989	8.781	8.833	8.285	9.78	9.366	7.331	9.229	9.574	9.066	8.455	9.306	8.622	8.061	9.077	9.484	8.555	8.934	8.842	8.983	9.281	8.566	8.468	9.207	8.629	9.814	9.95	9.526	0.734494	0.72061	0.487186	0.935955	0.18841	0.215714	0.766732	0.491904	0.694661	0.884879	0.881546	0.729785	0.993829
Angpt2	7.18	7.098	7.238	7.883	7.468	7.267	7.358	7.322	7.665	7.907	7.508	6.426	7.833	7.401	7.2	7.651	7.285	7.248	7.508	7.615	7.977	7.637	8.16	7.629	7.883	8.039	8.555	7.735	7.459	7.409	7.622	7.864	7.637	7.304	7.14	7.34	0.965355	0.686395	0.718496	0.64411	0.182463	0.0767377	0.767007	0.219739	0.130866	0.985495	0.855371	0.827906	0.98028
Cd83	8.077	9.449	8.253	7.2	8.15	7.972	8.358	7.728	7.762	7.592	8.124	8.326	7.735	7.418	7.728	7.16	6.954	6.82	8.472	7.845	8.349	9.384	8.778	8.409	8.69	7.775	7.983	7.508	8.934	8.426	6.977	7.285	7.418	7.794	7.313	6.919	0.478214	0.00370936	0.0216748	0.263461	9.51e-05	0.00224159	0.768007	0.353933	0.524692	0.778291	0.0513711	0.206614	0.738094
Armc1	7.82	8.093	7.755	8.618	8.253	7.7	7.679	8.422	8.248	8.492	8.447	7.629	8.455	8.19	8.64	8.581	7.937	7.484	7.794	8.362	8.409	7.679	8.459	7.864	8.48	8.267	8.618	8.644	8.19	7.585	7.983	8.14	7.858	8.219	8.539	8.022	0.601468	0.420877	0.775291	0.350803	0.880966	0.431932	0.76873	0.64165	0.44907	0.860277	0.636957	0.864838	0.822277
Ccl5	7.607	8.2	8.468	7.972	8.524	8.512	8.165	8.658	8.849	8.14	8.867	7.972	8.443	8.366	8.109	8.721	8.134	7.948	7.714	8.622	8.145	7.109	8.061	8.195	7.994	8.543	7.468	8.543	8.375	7.687	8.589	9.533	8.781	8.313	8.262	7.954	0.362657	0.769373	0.534567	0.609558	0.021368	0.0658318	0.774952	0.142753	0.0827927	0.686301	0.919739	0.737956	0.98028
Clec1b	7.418	6.443	6.768	6.931	6.833	6.728	6.555	6.7	6.358	6.989	6.845	7.629	6.129	5.858	3.807	6.755	6.555	6.755	7.044	6.267	7.375	7.384	7.16	6.919	6.044	6.807	6.794	7	6.728	7.7	6.977	5.807	7.033	7.129	3.907	7	0.986044	0.0475157	0.0493294	0.676192	0.102167	0.216308	0.777027	0.790731	0.583984	0.992807	0.185183	0.249844	0.985995
Itgam	8.5	7.295	8.19	7.219	7.2	7.358	7.044	7.948	7.435	7.755	8.006	7.331	7.814	7.562	8.253	7.966	8.833	8.687	7.022	7.607	6.768	6.629	7.349	8.313	6.358	7.492	7.248	7.022	8.322	6.209	7.2	7.937	7.19	8.629	8.585	8.165	0.902649	0.0986596	0.0774821	0.602428	0.049875	0.015253	0.777592	0.812957	0.604287	0.964709	0.271846	0.305129	0.98028
Lag3	4.858	5.426	4.954	4	4.087	4.755	5.358	3.17	4.392	4.644	3.907	5	3.907	4.392	3.807	3.459	5.209	3.459	5.555	3.585	4.248	5.781	4.17	3.807	5.392	3.907	4.755	3.807	4.7	3.907	3.7	5.087	4.459	3.7	3.907	3.807	0.493853	0.107782	0.342934	0.772434	0.292921	0.442448	0.778858	0.681652	0.896756	0.791054	0.285603	0.619983	0.985995
Egr3	4.907	5.728	5.426	4.322	5.17	5.755	5.755	4.755	5.129	4.907	5.17	5.931	4.585	5.492	3.807	4.459	3.459	4	5.492	3.322	6.17	6	6.426	5.858	5.129	4.807	6.615	5.087	5.672	5.248	5.615	5.087	4.644	6.109	3.907	3.807	0.897933	0.0437475	0.0329831	0.788287	0.127851	0.205454	0.77907	0.706856	0.512489	0.962165	0.175871	0.218104	0.985995
Hgf	8.322	8.082	8.281	8.916	8.472	8.547	8.384	9.006	8.721	8.96	8.873	8.114	8.633	8.535	3.807	8.721	8.17	8.29	8.134	8.992	8.864	7.358	9.09	8.725	8.388	8.839	8.904	8.811	8.443	8.071	8.34	8.679	8.687	8.401	8.672	8.581	0.622858	0.133039	0.0499072	0.920032	0.946181	0.973758	0.781576	0.263511	0.16595	0.874144	0.32659	0.249844	0.991635
Erg	8.426	8.281	8.145	8.547	8.596	8.366	8.05	8.2	8.388	8.562	8.124	8.401	8.589	8.524	3.807	8.714	8.508	8.637	8.248	8.304	8.574	8.401	8.618	8.195	8.589	8.492	8.476	8.69	8.353	8.185	8.807	8.43	8.651	8.044	8.05	8.234	0.818889	0.202842	0.292925	0.872689	0.964378	0.837674	0.783205	0.381404	0.546097	0.938133	0.406538	0.567514	0.987653
Kit	7.248	6.17	7.304	8.18	7.313	7.392	7.492	7.814	7.714	7.748	7.7	6.741	8.066	7.966	3.807	8.093	7.87	8.061	7	7.637	7.931	6.755	7.966	7.539	7.531	7.852	7.384	7.788	7.644	7.19	7.87	7.864	7.735	7.672	7.983	8.077	0.552179	0.924106	0.617138	0.834681	0.380115	0.501645	0.78426	0.578408	0.408522	0.833292	0.960756	0.78388	0.985995
Cd38	8.397	8.304	8.362	8.867	8.804	8.331	8.954	8.375	8.596	8.741	8.748	8.299	8.622	8.011	8.64	8.388	8.2	8.129	8.531	8.077	9.119	8.093	9.147	8.922	9.257	8.801	8.804	8.409	8.155	8.676	8.16	8.2	8.459	8.295	8.651	8.379	0.569184	0.347143	0.136032	0.851231	0.131274	0.0918722	0.78658	0.676905	0.883661	0.838917	0.572591	0.377454	0.985995
Col14a1	7.087	7.516	7.755	7.833	7.229	7.672	7.707	7.883	7.87	7.392	7.629	6.989	7.781	7.622	9.773	7.693	7.637	7.707	7.459	7.794	7.14	7.435	7.295	7.6	7.375	7.484	7.547	7.5	7.516	7.14	7.418	7.839	8.039	7.524	7.845	7.781	0.790156	0.033997	0.0603719	0.909718	0.230233	0.190541	0.788461	0.487906	0.669215	0.917681	0.154036	0.27254	0.990701
Mmp12	5.392	5.17	5.248	5.644	5.585	5.087	6.392	5.209	4.392	6	5.209	4.858	4.907	4.907	3.807	5.322	5	4.7	5.585	5.954	6.17	3.807	5.7	6.129	5.807	5.615	5.7	5.977	5.209	5.755	5.459	5.129	5.755	5.555	3.907	5.672	0.974625	0.100451	0.106785	0.729557	0.371025	0.21821	0.789446	0.582964	0.777162	0.989558	0.275115	0.350022	0.985995
Traf6	7.592	7.392	7.741	7.858	7.794	7.895	7.658	8.114	7.977	7.983	8.109	7.492	7.966	7.858	7.267	8.082	8.022	7.889	7.366	8.098	7.954	6.539	8.061	8.175	7.714	7.741	7.954	7.931	7.82	7.658	7.781	7.989	8.033	7.883	8.371	8	0.364716	0.486698	0.830513	0.591804	0.116077	0.290971	0.791035	0.523729	0.368668	0.686301	0.699506	0.894807	0.98028
Gata3	7.644	7.629	7.937	7.82	7.508	7.555	8.19	7.418	7.672	8.262	7.775	8.214	7.658	7.418	3.807	7.547	6.845	7.119	8.299	6.977	8.077	8.14	8.093	7.721	8.508	8.488	8.57	7.775	7.762	8.531	7.827	7.741	7.883	6.858	6.794	7.18	0.549368	0.0225171	0.00516924	0.334836	0.21239	0.0313756	0.793068	0.431929	0.598788	0.83238	0.129953	0.13522	0.817017
Acox1	10.44	10.4	10.28	10.19	10.2	10.3	10.57	10.08	10.27	10.25	10.23	10.59	9.999	10.1	12.03	10.13	10.04	10.29	10.44	10.02	10.33	10.64	10.11	10.08	10.7	10.36	10.32	10.21	10.4	10.28	10.1	9.993	10.17	10.47	10.26	10.17	0.887019	0.539787	0.6369	0.608604	0.718546	0.385031	0.793151	0.491853	0.34438	0.958869	0.744744	0.785688	0.98028
Pparg	6.375	6.443	6.087	5.954	6.044	5.728	5.931	5.833	5.728	5.833	5.954	6.248	6.248	6.109	7.267	5.728	5.755	5.728	6.644	5.322	5.883	7.077	5.615	5.833	6.209	6.129	5.285	5.807	6.392	6.044	6.392	5.644	6.392	6.322	7.14	6.129	0.493898	0.899043	0.418328	0.752213	0.310204	0.186641	0.793331	0.527543	0.710461	0.791054	0.953056	0.68234	0.985995
Cnksr1	6.508	7.238	7.401	6.907	6.977	7.055	7	7.066	7.055	6.858	6.943	6.794	7.098	7	7.728	7.16	6.954	7.492	7	7.011	6.807	6.943	6.845	7.055	6.615	6.87	6.714	7.15	6.82	7.435	7.358	7.248	7.304	7.15	7.2	7.109	0.663253	0.119733	0.0498988	0.94644	0.0509117	0.0440731	0.794313	0.763053	0.967426	0.875342	0.305154	0.249844	0.993829
Arhgef28	9.109	9.109	8.728	8.555	8.989	8.762	8.907	8.229	8.443	8.484	8.512	8.704	8.257	8.443	7.267	8.508	8.618	8.555	9.082	8.907	9.134	9.617	8.833	9.036	8.855	8.492	8.484	8.752	8.741	8.945	8.738	8.397	8.476	8.731	8.629	8.817	0.0566434	0.00103069	0.111872	0.0253791	0.00803613	0.632936	0.796403	0.582714	0.420982	0.350078	0.0280195	0.350022	0.28567
Cd28	6.322	6.524	6.585	5.17	6.044	6.229	6.248	5.883	5.672	5.672	5.833	6.285	6.304	5.524	3.807	5.209	4.907	5.585	6.7	5.322	6.109	7.384	6.459	6.585	6.644	6.322	6.044	5.672	6.895	6.492	5.907	5.358	5.322	6.443	3.907	5.672	0.559194	0.0157338	0.0586306	0.822818	0.00995369	0.0171285	0.798283	0.894062	0.697705	0.833292	0.1075	0.268968	0.985995
Msh2	7.435	7.468	7.516	8.061	7.735	7.748	7.775	7.864	7.827	7.814	8.05	7.392	7.977	7.562	8.071	8	7.392	7.229	7.384	7.6	7.807	7.762	8.022	7.665	7.637	8.011	7.807	8.066	7.762	7.392	7.476	7.679	7.366	7.531	7.807	7.629	0.402646	0.766499	0.587023	0.630197	0.406951	0.194107	0.799569	0.426202	0.586155	0.710271	0.919298	0.768048	0.98028
Il1rap	8.14	7.577	7.925	7.768	7.814	7.629	7.672	8.022	7.693	7.693	7.768	7.476	7.901	7.476	7.622	8.006	7.839	8.039	7.592	7.913	7.658	7.96	7.693	8.175	7.748	7.57	7.637	7.807	7.96	7.468	7.858	7.607	7.484	7.972	8.234	7.901	0.497682	0.96921	0.473809	0.306765	0.933353	0.269837	0.804642	0.974598	0.780142	0.791054	0.978542	0.718545	0.791431
Il1a	3.7	3.7	3	3.7	3.322	3.7	3.585	3.585	3.585	3.7	2.807	3.585	3.322	4.644	3.807	3.907	3.459	3.459	5.044	3.322	3.907	3.807	5.129	3.585	3.807	4.17	4.644	4.858	3.7	3.907	3.7	3.907	4.459	3.7	3.907	3.807	0.865297	0.365597	0.284391	0.857061	0.419935	0.325474	0.804713	0.228896	0.149742	0.945592	0.589776	0.564146	0.985995
Socs2	10.31	10.37	10.52	10.75	10.6	10.4	10.47	10.85	10.86	10.53	10.78	10.48	10.75	10.79	9.649	10.86	10.82	10.66	10.34	11.21	10.5	10.03	10.46	10.72	10.44	10.72	10.69	10.82	10.85	10.41	10.35	10.6	10.61	10.68	10.65	10.74	0.32285	0.57265	0.667087	0.514233	0.718059	0.769636	0.809058	0.885234	0.92242	0.637068	0.769143	0.799908	0.958629
Pfdn6	9.231	9.039	9.106	9.145	9.039	8.963	9.044	9.124	9.014	9.172	8.945	9.033	8.972	9.042	9.596	9.028	8.771	9.122	8.977	8.94	9.165	9.071	9.238	9.079	8.82	8.992	9.155	8.994	9.061	9.053	8.801	8.963	9.031	8.972	8.992	8.883	0.749589	0.989325	0.739491	0.510318	0.172472	0.4708	0.809446	0.32655	0.456807	0.890288	0.989325	0.843494	0.955544
Cav1	13.63	12.97	13.52	13.79	13.55	13.69	13.61	13.66	13.76	13.92	13.71	13.33	13.6	13.84	12.43	13.89	13.89	14.06	13.6	13.67	13.67	13.31	13.76	13.84	13.65	13.68	13.84	13.91	13.57	13.68	14.07	13.97	14.13	13.74	14.09	14.05	0.429099	0.597072	0.791202	0.650285	0.0439692	0.110854	0.809774	0.277129	0.187032	0.724328	0.788222	0.873755	0.985995
Lif	6.229	7.033	6.768	5.087	5.392	5.555	6.658	5.248	5	5.907	5.426	6.34	5.7	5.833	3.807	4.459	4.644	5.322	6.845	4.585	6.7	6.977	6.768	6.34	5.883	4.954	7.16	5.807	5.644	6.304	3.7	5.7	6.285	5.755	3.907	3.807	0.607707	0.035253	0.102605	0.396252	0.00342117	0.0279347	0.810752	0.500239	0.662594	0.860277	0.155878	0.344931	0.865621
Mapk12	5.781	5.807	5.392	5.907	5.044	5.585	5.555	5.426	5.781	5.883	5.358	5.492	6.629	5.728	7.622	5.524	5.907	5.931	5.755	5.644	5.285	6.19	5.883	5.358	5	6.229	5.615	5.931	5.459	6.459	5.459	5.426	5.555	5.426	3.907	6.022	0.990728	0.0407099	0.0396877	0.74927	0.204987	0.115895	0.814758	0.0212438	0.0121469	0.994272	0.17173	0.229977	0.985995
Mcm5	6.375	6.741	6.555	6.57	6.375	6.728	6.87	6.304	6.615	6.492	6.524	6.768	6.6	6.687	7.516	6.459	6.443	6.322	6.895	6.087	6.585	6.248	6.615	6.524	6.82	6.304	6.34	6.322	6.954	6.807	6.87	6.267	6.672	6.248	7.011	6.022	0.835049	0.535673	0.680042	0.590468	0.901559	0.678051	0.814969	0.725227	0.55898	0.945592	0.741857	0.807687	0.98028
Cd69	7.781	7.331	7.864	6.741	7.555	7.562	7.748	7.087	7.349	7.18	8.022	7.331	7.022	6.524	7.331	6.539	6.392	6.129	7.524	6.672	7.672	7.858	8.422	7.895	7.728	7.459	7.2	7.14	7.883	7.801	7.087	6.087	6.672	6.672	3.907	7.129	0.956807	0.0291475	0.0329242	0.700463	0.000394647	0.00115163	0.81503	0.244778	0.349695	0.984988	0.142629	0.218104	0.985995
Tlr7	5.833	5.459	6.248	5.17	5.248	5.17	5.728	5.977	6.267	5.977	6.109	5.459	6.741	5.728	3.807	5.755	5.858	6.044	5.358	5.954	4.907	3.807	5.459	5.883	6.044	6.209	6.109	5.358	5.555	5.248	5.977	5.833	6.109	5.672	3.907	3.807	0.306991	0.72876	0.496196	0.179936	0.978328	0.17164	0.815412	0.791392	0.619033	0.628113	0.888554	0.737956	0.601536
Des	10.39	10.06	9.541	9.725	9.278	11.38	9.812	9.19	9.676	9.788	9.362	10.02	9.545	9.828	13.97	9.679	9.669	9.678	9.757	9.409	9.422	10.87	9.707	9.688	9.873	9.516	9.622	9.437	9.683	9.132	9.748	9.488	9.839	10.42	9.447	9.609	0.380013	0.4871	0.120974	0.579148	0.915904	0.652953	0.817052	0.571049	0.426399	0.687971	0.699506	0.352361	0.98028
Il10ra	9.077	8.392	8.794	7.295	7.895	8.248	8.422	7.721	7.907	8.257	8.6	8.524	7.762	7.615	8.384	7.285	7.476	8.205	8.134	7.748	8.039	8.414	8.516	9.202	8.745	8.508	8.129	7.615	8.895	8.414	8.039	7.435	8.017	8.011	7.257	7.5	0.867166	0.07256	0.101074	0.875455	0.0240635	0.0166681	0.81883	0.719668	0.557336	0.945592	0.228579	0.343872	0.988591
Sesn1	8.384	8.006	8.647	8.913	8.508	8.836	8.155	8.758	8.883	8.785	8.867	7.931	8.748	8.611	10.1	9.022	8.892	9.344	8.093	9.177	8.48	7.508	8.615	8.804	8.392	8.771	8.57	8.707	8.551	8.229	8.596	8.48	8.52	8.492	8.607	9.082	0.952658	0.0219321	0.025156	0.704806	0.444421	0.697583	0.821113	0.256142	0.175888	0.984861	0.127778	0.211103	0.985995
Vav1	8.633	7.775	8.145	7.516	8.071	7.901	7.937	7.87	7.672	8.18	8.317	8.119	7.651	7.637	8.033	7.658	7.728	7.814	8.19	7.5	8.017	8.267	8.322	8.651	8.358	8.071	7.895	7.762	8.362	8.243	7.781	7.562	7.577	7.96	7.845	7.839	0.955724	0.125126	0.11274	0.792499	0.0190953	0.0348763	0.821756	0.531664	0.688031	0.984988	0.312441	0.350022	0.985995
Plau	6.248	6.524	6.17	5.858	5.7	5.977	6.358	5.492	5.524	5.644	5.781	6.322	6.443	5.644	7.672	5.285	3.459	4.807	6.728	5.555	6.687	7.011	6.794	6.209	6.919	6.687	6.585	5.807	5.858	6.539	5.807	5.907	6.066	5.555	3.907	3.807	0.574975	0.195183	0.454802	0.807183	0.00229582	0.0043662	0.822175	0.168626	0.111847	0.840951	0.398122	0.712397	0.985995
Flt1	9.119	8.124	8.963	8.997	8.768	9.025	8.855	8.852	8.951	8.864	8.804	8.615	8.945	8.96	7.82	9.379	9.386	9.794	8.693	9.18	9.033	8.362	8.886	9.2	8.798	8.633	9.192	9.058	9.055	8.96	9.527	9.132	9.371	8.94	9.165	9.301	0.965166	0.310417	0.290551	0.786081	0.105495	0.173428	0.823679	0.656244	0.823679	0.985495	0.526587	0.567514	0.985995
Chil4	11.11	10.28	11.51	10.91	10.52	10.44	11.02	12.07	11.91	11.87	12.18	11.1	11.93	11.73	8.447	11.99	11.85	11.84	10.7	11.84	10.8	8.633	10.8	11.34	10.35	12.01	12.07	11.72	11.14	11.31	11.13	12.04	11.76	11.51	11.89	11.9	0.0658721	0.293451	0.409014	0.122017	0.0379329	0.567904	0.824513	0.443396	0.32499	0.360936	0.510825	0.674643	0.506225
Lipa	9.042	8.697	9.379	9.555	9.217	9.093	9.172	9.607	9.605	9.498	9.83	9.006	9.461	9.422	8.966	9.747	9.459	9.564	8.986	9.388	9.414	8.17	9.572	9.674	9.324	9.494	9.723	9.508	9.369	9.16	9.466	9.514	9.778	9.14	9.424	9.468	0.141687	0.165051	0.932013	0.241529	0.177956	0.855072	0.825949	0.975693	0.849731	0.448072	0.361958	0.953138	0.70072
Lst1	6.304	5.807	6.129	5.358	5.524	5.524	5.426	5.209	5.248	5.728	5.672	5.755	5.858	5.392	3.807	5.781	6.129	5.585	5.7	5.555	5.555	5.781	5.7	6.629	5.426	6.209	5	5.755	6.585	5	5.672	5.977	4.954	6.443	3.907	6.358	0.454904	0.331977	0.820604	0.65962	0.454626	0.756779	0.826841	0.87284	0.95315	0.750337	0.556327	0.892331	0.985995
Ncor1	9.66	9.435	9.667	9.551	9.728	9.527	9.626	9.631	9.69	9.655	9.669	9.679	9.752	9.676	9.622	9.799	9.693	9.716	9.508	9.798	9.823	9.039	9.87	9.961	9.733	9.504	9.793	9.644	9.863	9.651	9.646	9.811	9.747	9.79	9.785	9.64	0.557612	0.292464	0.636034	0.77126	0.519343	0.722428	0.833672	0.769006	0.933212	0.833292	0.510825	0.785688	0.985995
Ccr9	4.807	6.285	5.492	4.248	4.907	4.807	5.285	4.644	5.087	5.459	5.248	5.209	5.585	4.17	3.807	4.392	3.459	4.954	3.807	5.17	5.285	6.19	5.248	5.209	5.129	5	5.459	5.17	5.524	5.644	5.459	5	5.585	5.044	3.907	3.807	0.858369	0.0603291	0.0412257	0.63874	0.333507	0.155197	0.83659	0.499643	0.638103	0.945592	0.210864	0.234571	0.98028
S100a9	15.1	13.23	14.02	13	13.22	12.86	9.922	12.7	11.72	11.67	12.09	10.47	13.91	13.13	9.674	14.08	14.9	13.97	11.34	13.98	12.23	11.81	12.95	13.78	8.253	10.25	9.932	12.09	13.97	10.04	12.2	14.22	12.4	15.2	14.91	14.08	0.00673349	0.693162	0.0177411	0.0138503	0.128609	0.000221849	0.836759	0.175758	0.247908	0.159432	0.859427	0.202605	0.28567
Cx3cl1	7.16	7.304	7.18	7.547	7.6	7.077	7.098	7.19	7.5	7.476	7.313	7.109	7.451	7.19	3.807	7.349	7.267	7.15	7.366	7.516	7.807	7.276	7.443	7.304	7.651	7.672	7.775	7.484	7.392	7.16	7.57	7.366	7.665	7.238	7.6	7.748	0.930409	0.0867894	0.102915	0.839576	0.81977	0.97971	0.837668	0.167643	0.236901	0.974209	0.251792	0.344931	0.985995
Stat1	9.322	8.91	9.362	9.47	9.524	9.506	9.504	9.342	9.504	9.416	9.464	9.124	9.476	9.449	9.214	9.353	9.109	9.283	9.611	9.651	9.486	8.974	9.707	9.758	9.533	9.42	10.23	9.412	9.745	9.353	9.355	9.407	9.683	9.124	9.103	9.399	0.761447	0.806253	0.583781	0.555452	0.198149	0.0651652	0.838988	0.456115	0.34463	0.897115	0.928481	0.767913	0.98028
F11r	11.54	11.26	11.18	11.42	11.27	11.11	11.42	11.19	11.11	11.24	11.27	11.33	11.28	11.21	9.635	11.2	11.08	10.96	11.5	11.14	11.49	11.42	11.47	11.11	11.61	11.37	11.26	11.33	11.31	11.32	11.24	11.26	11.15	11.09	11.27	11.24	0.829798	0.0235302	0.0382211	0.945452	0.39247	0.356378	0.841189	0.292986	0.392285	0.942836	0.130842	0.229977	0.993829
Fgf18	6.833	6.322	7.098	7.248	6.741	6.845	6.044	6.539	6.492	6.907	7.2	6.644	7.129	7.15	7.119	6.919	6.977	6.907	7.238	6.895	7.492	6.977	7.401	7.066	6.267	6.858	7.295	7.592	6.82	7.276	7.248	6.919	6.87	7.055	7.313	7.276	0.239169	0.297249	0.0308594	0.367498	0.714498	0.589494	0.841359	0.31996	0.234391	0.582842	0.515795	0.217955	0.82998
H2-Q10	7.845	6.687	7.707	6.907	6.672	7.129	4.858	6.409	6.15	5.954	6.34	5.672	7.468	7.679	10.73	7.907	8.353	7.948	5.7	7.248	6.539	6.585	7.451	8.366	4.585	6.833	3.7	6.755	8.17	5.248	7.109	8.022	6.966	9.478	8.234	8.5	0.0326192	0.0429579	0.00013402	0.0601632	0.0670203	0.000544016	0.841375	0.881731	0.727343	0.2741	0.175871	0.0327902	0.362247
Fasn	11.9	10.77	11.34	11.36	10.89	11.21	10.99	11.09	11.3	10.92	11.12	10.7	11.34	11.93	13.22	11.26	11.15	11.22	11.18	11.74	11.11	11.37	11.42	11.31	11.26	11.8	11.03	11	11.08	10.22	11.26	11.33	11.46	11.33	11.34	11.28	0.340908	0.0668215	0.00733706	0.221803	0.926403	0.257475	0.844687	0.168875	0.235062	0.665495	0.22437	0.138087	0.662045
Ifnb1	3.17	3.7	3	3.459	3.322	3.459	3.585	3	3.459	3.322	2.807	3.585	4	3.322	3.807	3.459	3.459	3.459	3.807	3.17	3.17	5.7	3.322	3.585	3.807	3.907	3.7	3.807	3.7	3.907	3.7	3.907	3.907	3.7	3.907	3.807	0.819268	0.367761	0.261138	0.961674	0.910046	0.948225	0.844962	0.575673	0.451266	0.938133	0.590671	0.532432	0.997368
Cebpa	11.38	11.09	11.08	11.16	11.03	11.1	11.02	11.1	10.93	10.81	11.17	11.15	11.18	11.06	10.81	11.17	10.86	10.98	11.06	11.32	11.14	11.22	11.11	11.37	11.14	11.29	11.12	11.12	11.1	10.95	10.82	10.99	10.96	10.96	11.36	11.18	0.27471	0.198406	0.841139	0.406072	0.119534	0.454146	0.850108	0.840868	0.696972	0.616005	0.402083	0.896076	0.876987
Il1rl1	6.109	6.7	6.781	5.807	5.755	6.392	6.19	5.833	6.044	5.883	5.858	6.285	6.794	6.044	3.807	5.728	6.129	6.087	5.954	6.539	5.781	6.492	5.524	6.358	6	5.833	6.044	5.672	6.066	6.15	6.392	6.409	6.17	6.109	3.907	5.524	0.498989	0.17335	0.483561	0.680068	0.321425	0.558663	0.851057	0.786903	0.934119	0.791054	0.374501	0.728816	0.985995
Timp3	12.74	12.35	12.6	13.32	12.87	12.81	12.83	13.62	13.39	13.32	13.21	12.33	13.57	13.59	12.12	13.66	13.72	13.9	12.57	13.21	12.73	12.06	12.99	12.48	13.08	13.34	13.21	13.34	12.86	12.59	13.71	13.57	13.45	13.61	13.71	13.39	0.168101	0.0106031	0.201178	0.10471	0.000635457	0.0419767	0.855494	0.453324	0.568934	0.487205	0.0874459	0.464354	0.480357
Ptgs1	8.29	7.972	8.725	9.157	8.618	8.919	8.7	9.437	9.562	9.364	8.864	8.155	9.175	9.594	8.615	9.543	9.95	10.02	8.418	9.553	8.459	7.304	8.798	9.022	8.707	9.039	9.384	9.358	8.539	8.476	9.658	9.453	9.956	9.401	9.898	9.916	0.177624	0.00528149	0.115895	0.271471	0.000517866	0.00989207	0.855552	0.543642	0.431115	0.496658	0.0645099	0.350022	0.746308
Socs3	8.855	8.954	8.907	8.033	7.531	7.966	7.762	7.585	7.426	7.238	7.209	7.937	8.129	7.883	7.267	7.672	8.281	8.898	8.257	9.044	7.833	7.994	8.205	8.109	6.966	7.209	7.913	7.119	8.14	7.409	7.531	7.735	8.155	8.209	7.954	7.679	0.00258702	0.183463	0.0651243	0.0050667	0.171116	0.117055	0.855862	0.977341	0.833651	0.0904226	0.385666	0.282848	0.28567
Ddr2	10.04	10.39	10.05	10.08	9.976	10.03	9.98	9.628	9.664	9.791	9.704	10.2	9.662	9.697	9.264	9.721	9.416	9.883	10.39	9.741	10.19	10.58	9.986	9.896	10.16	9.52	9.847	9.811	9.926	10.12	9.861	9.78	9.896	9.807	9.747	9.707	0.0558528	0.000989352	0.110143	0.0921485	0.0193411	0.472303	0.861763	0.416464	0.521787	0.350078	0.0280195	0.350022	0.447927
Tnfrsf11a	6	6.044	5.858	6.129	6.022	5.755	6.17	5.728	5.672	6.087	5.883	6.426	4.907	5.728	3.807	5.833	4.907	5.781	6.755	5.524	5.672	6.585	6.066	6.19	6.392	6.17	6.15	6.19	6.285	6.19	5.977	5.426	5.392	5.392	3.907	5.931	0.927518	0.00837403	0.00666057	0.73647	0.00936477	0.00397384	0.862016	0.974666	0.887025	0.974209	0.0822867	0.138087	0.985995
Ptprc	11.43	10.57	11.04	10.06	10.47	10.38	10.24	10.19	10.2	10.44	10.68	10.64	10.29	10.14	10.04	10.22	10.22	10.21	10.38	10.11	10.49	10.62	10.81	11.42	10.53	10.41	10.07	10.07	11.18	10.3	10.11	10.26	10	10.6	10.25	10.36	0.198471	0.0233494	0.293035	0.293035	0.0673259	0.415493	0.86403	0.732161	0.86403	0.522143	0.130828	0.567514	0.781835
Pde4a	7.948	8.371	7.735	7.524	7.665	7.672	8.098	7.304	7.531	7.607	7.57	8.145	7.358	7.349	8.69	7.229	7.248	7.459	8.165	6.781	7.714	8.508	7.679	7.721	7.707	7.34	7.966	7.57	7.735	7.931	7.801	7.508	8.033	7.735	7.313	7.401	0.640379	0.266687	0.514694	0.821124	0.582582	0.745576	0.864277	0.686881	0.816117	0.875342	0.486936	0.737956	0.985995
Mapk11	6.322	5.728	6.267	5.644	5.833	5.931	6.066	5.833	5.426	5.426	5.672	6.304	6.285	5.907	3.807	6.229	6.087	6.443	6.672	6.209	6.304	6.129	6.066	6.129	6.15	5.807	5.524	5.977	6.229	6.409	6.539	5.755	6.066	6.15	7.077	6.129	0.564232	0.576334	0.985673	0.415548	0.904568	0.351385	0.865055	0.631239	0.516554	0.833292	0.769143	0.994939	0.884094
Ly6c1	12.8	11.87	12.41	12.73	12.61	12.47	12.66	12.99	12.84	13.04	12.88	12.2	12.83	12.82	11.61	13.14	13.18	13.38	12.25	13.05	12.52	11.82	12.45	12.34	12.87	12.71	13.06	13.05	12.54	12.24	12.76	12.79	12.84	12.7	12.88	12.77	0.205016	0.129322	0.794019	0.134766	0.0919352	0.840338	0.865914	0.899217	0.966322	0.529866	0.320139	0.873778	0.534692
Pdzk1ip1	7.209	7.531	7.257	7.119	7.516	7.508	7.693	7.15	7.384	7.392	7.098	7.375	7.484	7.375	7.459	7.607	7.331	6.954	7.728	7.468	7.451	7.721	7.129	7.229	7.524	7.2	7.508	7.459	7.257	7.524	7.087	6.833	7.044	7.34	7.807	7	0.955992	0.935859	0.892102	0.770419	0.0705179	0.124678	0.867029	0.17702	0.234499	0.984988	0.967211	0.931158	0.985995
Serpine1	8.954	8.877	8.615	8.326	8.476	9.212	8.52	8.604	8.7	8.134	8.055	8.464	8.596	8.943	9.066	8.451	8.676	9.25	8.439	9.017	8.414	8.839	8.728	8.817	7.845	7.937	8.229	8.443	9.207	8.308	9.082	8.414	8.919	9.624	8.886	8.304	0.127571	0.683196	0.0568306	0.0808903	0.447392	0.0149872	0.867262	0.802095	0.676417	0.435274	0.852833	0.263257	0.409472
Sema5a	6.524	6.267	5.755	6.895	6.229	6.285	6.375	6.858	6.931	7.276	6.728	6	7.358	6.858	3.807	7.109	6.755	6.6	6.229	6.658	6.304	6.492	6.7	5.858	6.919	7.219	7.358	7.109	6.687	5.781	6.508	6.375	5.858	6.931	3.907	6.555	0.410603	0.842406	0.53102	0.293987	0.43315	0.0720282	0.870052	0.487112	0.391891	0.711444	0.936184	0.737956	0.781835
Nfkbie	5.358	5.977	5.755	5.248	5.392	5.555	5.426	5	5.426	6.066	6.15	5.907	5.087	5.977	7.044	5.322	5.977	5.555	6.109	5.931	5.492	3.807	6.358	6.229	6.044	5.781	5.833	5.644	6.129	5.7	5.672	5.555	6.17	5.615	3.907	3.807	0.758545	0.456659	0.660402	0.59196	0.160232	0.0564918	0.871054	0.131138	0.0964093	0.895132	0.665522	0.795952	0.98028
Mok	7.827	8.414	7.426	6.87	7.087	6.781	7.539	6.858	7.304	6.728	7.055	7.807	7.033	6.794	3.807	6.358	6.954	7.044	8	6.794	6.768	8.124	6.644	7.15	7.839	6.931	7.15	6.845	7.044	7.087	6.508	6.919	7.066	6.931	7.257	6.555	0.635119	0.00953445	0.0294641	0.803289	0.341751	0.480451	0.872964	0.213821	0.276456	0.875342	0.0832813	0.213718	0.985995
Vcam1	7.87	8.596	8.295	8.14	8.271	7.741	7.989	8.14	7.516	7.966	8.028	8.18	7.858	7.919	7.57	7.972	7.7	8.129	8.124	8.299	8.103	8.644	8.017	7.948	8.071	7.925	7.5	7.687	8.539	8.098	8.061	8.077	8.055	7.937	8.371	7.592	0.273019	0.0814243	0.498832	0.189495	0.296045	0.782543	0.874413	0.605795	0.501053	0.616005	0.240022	0.737956	0.62639
Btla	6.977	7.077	7.401	7.087	7.901	7.34	7.257	6.7	7.331	7.468	7.735	7.34	7.257	6.883	8.788	7.459	6.741	6.919	7.852	6.15	7.349	7.531	7.845	7.994	8.195	7.801	6.943	7.044	7.209	8.006	7.129	6.087	5.672	6.19	6.87	7.022	0.980064	0.890701	0.910476	0.803977	0.00498672	0.00260387	0.874542	0.0328162	0.022907	0.990864	0.949881	0.941253	0.985995
Igf1	6.209	7.16	6.392	6.443	5.954	6.129	6.508	5.755	5.858	6.044	6.129	6.304	6.672	6.392	9.748	5.755	5.977	6.129	6.943	6.555	5.672	6.409	6.066	6.459	6.358	6.34	5.615	5.858	6.17	5.426	6.267	5.954	6	7.524	3.907	3.807	0.563676	0.415918	0.168902	0.425459	0.118453	0.431168	0.875225	0.0956098	0.128839	0.833292	0.630751	0.424293	0.897376
Gsn	13.82	13.88	13.99	14.53	14.28	14.13	13.95	14.37	14.27	14.34	14.45	13.98	14.19	14.16	14.08	14.51	14.25	14.24	13.8	14.34	14.21	13.5	14.33	14.06	13.81	14.17	14.26	14.47	14.17	13.91	14.12	14.29	14.12	14.31	14.34	14.16	0.379013	0.335602	0.932361	0.506329	0.188354	0.506329	0.877369	0.797111	0.681069	0.687971	0.559846	0.953138	0.952938
Serpinb9	8.028	7.943	7.983	8.622	8.388	8.071	8.011	8.384	8.388	8.29	8.468	7.443	8.524	8.459	3.807	8.349	8.061	8.082	8.18	8.676	8.388	8.077	8.827	8.788	8.405	8.535	8.375	8.604	8.229	8.16	8.295	8.388	8.375	8.34	8.585	8.418	0.984734	0.165591	0.171242	0.813816	0.840969	0.972167	0.878364	0.395992	0.317903	0.992807	0.361958	0.427523	0.985995
Adamts17	8.87	8.977	8.468	7.937	8.512	8.285	7.6	6.977	6.977	6.807	7.229	7.989	6.87	6.57	3.807	6.248	6.644	6.807	8.765	8.109	8.928	9.055	8.531	8.43	8.52	7.15	6.585	7.2	7.687	7.801	7.476	6.895	7.562	6.409	3.907	6.977	0.0119008	1.81e-05	0.0240679	0.0197158	8.61e-05	0.0495143	0.88149	0.705263	0.818516	0.211675	0.00266254	0.211103	0.28567
Nr4a1	12.19	12.27	11.78	10.27	10.7	11.23	11.15	9.788	10.01	10.62	10.73	11.47	9.972	10.16	10.71	9.103	8.913	9.349	12.1	9.961	11.9	12.47	12.35	11.68	11	9.928	10.91	10.71	11.97	10.69	10.61	10.12	9.753	12.17	10.68	9.109	0.0985177	0.000753032	0.0512429	0.0647065	0.00636646	0.321229	0.881974	0.572465	0.47679	0.399514	0.0273725	0.250748	0.372202
Psmb8	10.09	9.959	10.02	9.892	9.948	10	10.55	9.98	10.03	10.1	10.15	9.945	9.881	9.765	9.748	9.863	9.5	9.977	10.15	10.02	10.04	10.04	10.14	10.12	10.5	10.27	10.5	10.05	10.11	10.05	9.825	9.959	9.944	9.672	9.674	9.839	0.159768	0.0541774	0.00165186	0.108677	0.0105588	0.000124774	0.882338	0.615125	0.515934	0.482121	0.200992	0.0823812	0.484872
Pglyrp1	9.711	8.344	8.907	7.707	8.358	7.714	7.375	7.484	7.788	7.577	7.748	7.728	8.492	8.17	7.044	8.589	9.324	8.082	8.071	8.335	7.57	8.849	8.388	8.852	7.066	7.516	7.129	7.468	8.977	7.304	7.637	8.711	7.728	9.326	9.447	8.728	0.0212031	0.620397	0.0633213	0.0340743	0.472439	0.00604451	0.883064	0.391971	0.477031	0.241471	0.807396	0.279987	0.28567
Hpgd	12.52	12.14	12.36	13.43	13.15	12.77	12.68	13.74	13.94	14.06	13.78	12.18	13.47	13.62	10.63	13.7	13.57	13.55	12.27	13.5	12.92	11.42	13.3	13.03	13.22	13.95	13.65	13.9	13	12.2	13.62	13.55	13.7	13.19	13.57	13.5	0.123949	0.398864	0.473689	0.179855	0.0738928	0.636738	0.883521	0.487654	0.401733	0.429794	0.61765	0.718545	0.601536
Jag1	9.014	9.055	8.845	8.64	8.672	8.735	8.945	8.57	8.655	8.633	8.644	9.103	8.771	8.707	7.622	8.472	8.464	8.492	8.807	8.585	8.651	9.25	8.585	8.748	8.945	8.29	8.945	8.451	8.889	8.889	8.562	8.768	8.629	8.707	8.811	8.637	0.663886	0.0141395	0.0385932	0.818336	0.588581	0.754939	0.884526	0.156937	0.201833	0.875342	0.103425	0.229977	0.985995
Furin	10.1	9.407	10.04	10.17	9.558	9.82	9.736	10.07	9.938	9.963	10.16	9.449	10.12	10.04	9.785	10.04	10.26	10.36	9.416	10.17	9.388	9.207	10.19	10.03	9.711	10.06	9.844	10.06	9.785	9.369	10.31	10.19	10.14	10.33	10.2	10.18	0.82717	0.142426	0.208432	0.672739	0.00611186	0.0173171	0.884999	0.318446	0.39203	0.942769	0.33832	0.470573	0.985995
Map2k3	8.647	8.512	8.669	8.711	8.547	8.693	8.741	9.014	8.907	8.87	8.615	8.592	8.925	8.901	9.931	9.16	9.155	8.963	8.447	8.781	8.562	8.349	8.52	8.669	8.331	8.798	9.031	8.877	8.676	8.748	8.468	8.954	8.804	9.006	9.103	8.778	0.265307	0.000543477	0.0107019	0.190307	0.0429751	0.446913	0.886024	0.228242	0.179335	0.614308	0.0209954	0.174941	0.62639
Adamts12	5.781	6.34	5.781	5.129	5.728	5.672	5.524	4.392	5.129	5.426	4.524	5.044	5.087	4.392	3.807	4.524	5	3.807	5.907	5.044	5.555	6.539	5.392	5.524	6.087	4.392	4.644	4.755	4.392	4.907	5.977	5.322	4.585	4.954	3.907	3.807	0.0298811	0.000311365	0.0860585	0.0187769	0.00861546	0.748389	0.886802	0.385255	0.313617	0.267472	0.0163244	0.317422	0.28567
Il21r	5.524	6.322	6.585	6.209	6.392	6.392	6.34	5.585	6.409	6.755	6.807	6.966	6.539	5.728	7.672	6.15	6.229	5.459	7.066	5.781	6.714	6.248	7.055	7.401	7.066	7.109	6.845	6.426	6.833	6.977	6.585	6.392	5.833	6.741	3.907	6.6	0.523625	0.875216	0.629892	0.659745	0.0683692	0.0262553	0.888173	0.157961	0.201506	0.809139	0.948904	0.784959	0.985995
Cd244	8.725	6.989	8.155	7.238	7.839	7.577	7.435	7.728	7.451	8.109	7.883	8	7.267	6.919	3.807	6.794	7.864	8.028	7	7.209	6.966	7.248	7.392	8.435	7.375	7.651	7.508	6.833	8.276	7.17	7.313	7.248	7	7.2	7.807	7.418	0.973332	0.0239014	0.0221218	0.820685	0.915328	0.73929	0.891281	0.119114	0.153035	0.989558	0.131907	0.207303	0.985995
Nfkbiz	10.35	9.967	10.19	8.96	9.29	9.658	9.531	8.752	8.762	8.983	8.849	9.788	8.858	8.804	9.124	8.435	8.839	9.17	10.41	9.025	9.974	10.14	9.907	10.01	9.502	8.901	9.295	8.98	9.905	9.405	9.095	8.972	9.044	9.579	9.18	8.704	0.0120862	0.000857721	0.316076	0.0191243	0.0015094	0.323099	0.892267	0.884009	0.991656	0.211675	0.0273725	0.590331	0.28567
Coasy	7.531	7.687	7.748	7.459	7.358	7.358	7.714	7.109	7.257	7.375	7.304	7.6	7.19	7.15	8.15	7.248	6.931	7.443	8	7.17	7.349	7.801	7.459	7.693	7.707	7.322	7.358	7.276	7.562	7.285	7.295	7.34	7.276	7.2	7.6	7.276	0.407943	0.278091	0.792807	0.310019	0.121166	0.578818	0.89229	0.731779	0.835555	0.711235	0.49664	0.873755	0.791431
Smad1	8.547	8.317	8.562	8.957	8.637	8.804	8.64	8.836	8.919	8.904	8.957	8.443	8.957	8.758	8.504	8.951	8.687	8.662	8.672	8.957	8.741	7.994	8.798	8.647	8.765	8.748	8.948	8.94	8.948	8.484	8.725	8.804	8.577	8.731	8.752	8.855	0.281691	0.390908	0.823201	0.209251	0.432654	0.629696	0.895922	0.957985	0.854432	0.616005	0.610748	0.892403	0.650807
Faf1	5.833	5.907	5.644	5.781	5.858	5.858	5.858	5.7	5.931	5.728	5.524	5.858	6.358	6.129	3.807	5.672	5.907	5.555	5.644	6.109	6	5.931	5.907	6.17	5.7	5.755	5.672	6.19	5.781	6.044	6.358	6.15	6.022	6	3.907	6.19	0.881167	0.443216	0.535936	0.742977	0.548822	0.784936	0.899472	0.904814	0.80582	0.953948	0.654568	0.737956	0.985995
Anxa1	11.41	11.15	11.06	10.78	10.93	10.85	10.87	10.9	10.8	10.76	10.63	10.87	10.57	11.04	10.37	10.79	10.76	10.95	10.9	10.74	10.86	11.36	10.82	11.13	10.57	10.52	10.89	10.81	10.8	11	10.88	10.91	11.03	11.08	10.99	10.91	0.0723683	0.0257039	0.633207	0.102838	0.989102	0.105572	0.900089	0.109782	0.138734	0.361349	0.137258	0.785018	0.478511
Fcgr3	7.807	7.331	7.833	8.219	7.845	7.285	7.066	8.484	8.114	8.055	8.195	7.2	8.335	7.788	7.459	8.714	8.811	8.418	6.615	8.539	7.349	6.248	7.839	8.039	6.508	7.901	7.687	7.937	8.129	6.907	7.672	8.551	7.484	8.555	8.672	8.281	0.694127	0.119071	0.237079	0.82734	0.0286705	0.0464407	0.901223	0.628845	0.544114	0.875342	0.305154	0.504394	0.985995
Ndufa7	10.67	10.41	10.33	10.15	10.28	10.45	10.42	10.22	10.18	10.37	10.24	10.57	10.18	10.16	11.56	10.08	10.32	10.3	10.62	10.19	10.29	10.7	10.33	10.44	10.53	10.24	10.3	10.26	10.31	10.48	10.39	10.25	10.43	10.41	10.61	10.32	0.766355	0.750783	0.539629	0.645061	0.869713	0.766355	0.907657	0.733514	0.822234	0.899981	0.909364	0.737956	0.98028
Flt3	4.585	5.358	5.644	5.858	5.615	4.755	5.492	5.392	5.555	5.087	5.492	5.585	6	5.728	3.807	5.492	5.728	5.7	5.044	5.555	4.644	3.807	5.044	5.644	5.644	5.615	4.907	4.907	5.907	3.907	3.7	5.087	5.392	5.087	3.907	3.807	0.723114	0.773458	0.946894	0.605831	0.220033	0.0859333	0.908544	0.283934	0.23682	0.88167	0.921021	0.9647	0.98028
Rgs1	6.285	6.87	7.257	3.459	5.087	5.285	5.781	5.129	5.322	3.322	5.129	5.322	4.907	4.755	3.807	3.7	4.7	5.781	5.285	6.392	5.248	6.19	5.426	6.229	4.807	5.358	3.7	4.7	6.322	5.129	3.7	5.833	3.907	6.285	3.907	3.807	0.201396	0.0508465	0.473784	0.153166	0.0310378	0.433489	0.911276	0.873391	0.961761	0.527502	0.194815	0.718545	0.559323
Rin2	10.01	9.315	9.741	10.38	10.26	10.25	9.741	10.37	10.32	10.06	10.02	9.324	10.3	10.37	8.558	10.43	10.62	10.67	9.755	10.62	10.13	9.192	10.2	10.01	9.929	9.919	9.904	10.27	9.861	9.669	10.37	10.25	10.4	10.28	10.44	10.51	0.93794	0.524586	0.475653	0.819376	0.138495	0.0897943	0.915213	0.539945	0.472605	0.980695	0.732026	0.718762	0.985995
Enpp2	7	7.322	7.257	8.405	7.693	8.405	7.267	8.134	8.061	8.243	8.276	7.375	8.19	8.006	10.17	8.539	8.033	8.119	7.295	8.093	7.919	7.044	7.977	7.468	7.707	8.017	8.129	7.925	7.762	7.276	8.276	8.281	7.814	8.304	7.644	8.14	0.47964	0.00876452	0.0458736	0.57088	0.144732	0.363224	0.920309	0.365583	0.419976	0.778885	0.0824764	0.247914	0.98028
Socs1	5.755	6.492	5.644	5.907	5.781	5.907	6	5.644	5.7	5.954	6.209	6.17	6.229	5.728	3.807	5.644	6.022	5.358	6.615	5.907	6.6	5.858	6.768	5.858	6.358	6.409	6.858	5.931	6.304	6.209	6.17	5.755	6.109	6.109	3.907	5.459	0.921529	0.170437	0.143003	0.811337	0.0410272	0.0239991	0.920983	0.610622	0.54342	0.974209	0.37012	0.387322	0.985995
Fadd	6.322	5.807	6.476	6.443	5.931	6.285	6.304	6.044	6.322	6.409	6.555	6.022	6.539	6.409	3.807	6.044	6.17	6.15	5.644	6.34	6.209	6	6.392	6.409	6.34	5.858	6.15	6.392	6.209	6.15	6.304	6.34	6.443	6.19	3.907	6.19	0.852153	0.311641	0.232923	0.960175	0.443191	0.414495	0.92312	0.859899	0.784933	0.945592	0.527061	0.502353	0.997368
Raf1	9.394	8.937	9.155	9.157	9.017	8.904	9.033	9.106	9.127	9.152	9.238	9.152	8.957	9.047	9.347	9.119	9.236	8.898	8.91	9.145	9.077	8.611	9.25	9.355	8.963	9.044	9.177	9.098	9.224	8.994	9.014	9.066	9.003	9.439	8.94	8.892	0.724928	0.953955	0.768542	0.826388	0.993089	0.833133	0.925187	0.972315	0.952791	0.882417	0.970439	0.863875	0.985995
Itga5	8.422	7.954	8.017	7.384	7.304	7.925	7.907	7.322	7.366	7.539	7.392	7.833	7.524	7.409	7.622	7.077	6.977	7.788	7.728	7.248	7.714	9.087	7.524	8.033	7.459	7.18	7.547	7.2	8.219	7.895	7.585	7.257	8	8	7.508	7.18	0.26253	0.0802515	0.510054	0.213241	0.220641	0.983553	0.927607	0.696045	0.630436	0.611506	0.239449	0.737956	0.654891
Tlr13	7.562	6.741	7.658	7.129	7.2	6.687	6.426	7.508	7	7.219	7.16	5.833	7.622	7.055	3.807	7.748	8.304	8.353	6.267	7.672	6.524	6.129	7.358	7.913	6.358	7.349	6.907	6.358	7.966	5.492	6.714	7.443	6.57	7.948	8.262	8.022	0.556048	0.977365	0.575089	0.644622	0.32197	0.150918	0.927705	0.46975	0.526642	0.833292	0.98272	0.757837	0.98028
Cxcl1	3.17	3.7	3	3.7	3.322	3.459	3.585	3	3.459	3.322	2.807	3.585	4.322	3.322	3.807	3.459	3.459	3.7	4.954	4.087	3.322	3.807	4.459	3.585	3.807	3.907	4.644	3.807	3.7	3.907	3.7	3.907	3.907	3.7	3.907	3.807	0.641198	0.182416	0.0760851	0.728122	0.315253	0.507901	0.933016	0.101707	0.086301	0.875342	0.384751	0.305129	0.985995
Osm	8.535	6.426	7.644	5.17	4.7	6.109	5	5.358	5.755	5.209	5.209	5.585	6.066	5.931	3.807	6.022	6.644	6.687	5.044	6.883	6.392	6	7.17	8.103	3.807	5.615	5.615	5.358	7.82	5.322	6.022	6.883	5.322	9.087	7.883	6.555	0.0964196	0.370859	0.42653	0.118653	0.571262	0.0371105	0.938828	0.303268	0.339836	0.395374	0.593148	0.693216	0.498645
Tmem173	7.077	6.833	6.895	6.7	6.833	6.358	7.109	6.629	6.555	6.34	6.794	6.977	6.358	6.539	3.807	6.19	6.066	6.022	7.209	6.741	6.907	6.755	6.943	6.781	7.435	6.858	6.728	6.129	6.858	6.807	6.229	6.539	6.17	6.358	3.907	6.409	0.891038	0.0109578	0.015277	0.806962	0.0108323	0.0194937	0.939438	0.997353	0.942078	0.961796	0.0893577	0.202605	0.985995
Fgf10	7.539	7.129	7.801	7.839	7.755	7.943	7.401	8.119	7.748	7.577	8.077	7.322	8.022	7.637	3.807	7.555	7.637	7.781	7.524	8.055	7.375	7.331	7.651	7.901	7.276	7.555	7.7	7.762	8.145	7.384	7.622	7.693	7.877	7.755	7.768	7.384	0.920169	0.139904	0.116189	0.99496	0.912151	0.907145	0.939948	0.259044	0.229524	0.974209	0.336782	0.350022	0.997849
Daxx	6.833	6.443	6.476	6.229	6.15	6.492	6.476	6.022	6.15	6.34	6.508	6.781	5.858	6.066	7.119	6.209	6.022	6.285	6.267	5.931	6.459	6.755	6.409	6.392	6.285	6.304	6.426	6.392	6.585	6.044	6.358	6.375	6.022	6.672	3.907	6.19	0.838809	0.532756	0.673272	0.917101	0.120858	0.14635	0.943974	0.500743	0.457625	0.945592	0.740611	0.80225	0.991635
Cd14	9.025	9.222	9.278	7.426	7.516	7.539	8.175	8.114	7.781	7.5	7.858	8.308	8.155	7.948	3.807	7.82	9.031	8.811	8.426	9.34	7.827	8.155	7.748	8.257	7.728	7.547	7.807	7.889	8.611	7.577	7.401	7.781	7.276	8.954	8.672	7.858	0.489633	0.181726	0.509987	0.43035	0.580981	0.811018	0.9442	0.571926	0.525681	0.788138	0.3844	0.737956	0.902506
Cd274	7.827	7.679	8.124	7.615	7.794	7.889	7.977	7.5	7.721	7.972	7.781	7.983	7.539	7.607	7.044	7.5	7.349	7.622	8.257	7.937	8.114	8.011	8.19	8.19	8.103	7.943	8.836	8.055	7.672	8.18	7.781	7.748	8	7.768	7.409	7.728	0.994371	0.0113851	0.0111901	0.915732	0.0114508	0.00881797	0.944325	0.998673	0.945648	0.995728	0.0908334	0.178554	0.991635
Ier3	10.15	9.718	9.47	9.94	9.867	9.844	10.37	9.655	9.704	10.35	10.06	10.42	10.21	10.16	8.447	10.31	9.596	9.896	10.13	9.229	10.78	9.866	10.82	10.15	10.51	10.34	10.7	10.57	9.718	10.56	9.898	10.09	10.04	9.721	9.993	9.692	0.307211	0.808362	0.209001	0.354005	0.316086	0.0589138	0.945653	0.587981	0.635489	0.628113	0.928481	0.470573	0.822277
Cxcl2	5.248	4.585	4.954	3.459	3.322	3.459	3.585	4.087	3.907	3.322	2.807	3.585	4	3.322	3.807	3.585	5.728	5.17	3.807	6	4.459	3.807	4.807	6.087	3.807	3.907	3.7	3.807	5.755	3.907	3.7	3.907	3.907	8.409	7.077	5.524	0.311786	0.873089	0.2433	0.269357	0.334918	0.0434494	0.946113	0.56702	0.522534	0.633088	0.948904	0.510235	0.746308
Mpeg1	11.07	10.36	10.86	10.33	10.5	10.3	10.84	10.7	10.41	10.67	10.91	10.58	10.36	10.26	8.558	10.17	10.29	10.58	10.55	10.38	10.47	10.07	10.75	11.1	10.75	10.89	10.73	10.25	11.03	10.49	9.88	10.35	10.14	10.22	10.47	10.4	0.614851	0.0246893	0.0073097	0.550198	0.180346	0.0571636	0.94645	0.489725	0.532451	0.867886	0.134778	0.138087	0.98028
Cxcr2	9.09	7.954	8.679	7.508	7.409	7.322	4.248	7.7	6.741	7.055	7.401	6.358	8.516	7.919	3.807	8.849	9.101	8.405	5.807	8.353	7.248	6.714	7.972	8.948	3.807	5.931	5.807	7.2	9.028	5.209	7.055	9.082	7.401	9.79	9.609	9.347	0.0622558	0.757199	0.114976	0.0749256	0.107881	0.00141769	0.949012	0.174075	0.194316	0.351382	0.912085	0.350022	0.393119
H2-Ab1	11.73	12.2	12.06	12.15	12.41	12.21	12.35	12.15	12.22	12.21	12.45	12.09	12.15	11.98	12.11	12.03	11.77	12.12	12.18	12.27	12.25	11.78	12.41	12.42	12.54	12.25	12.44	12.24	12.36	12.25	11.92	12.12	11.96	11.71	11.89	11.98	0.299472	0.379426	0.0605232	0.261195	0.0150622	0.000782231	0.950137	0.244001	0.220393	0.621706	0.597636	0.27254	0.738094
Tgfb1	10.04	9.373	9.566	9.62	9.773	9.583	9.856	9.585	9.451	9.758	9.928	9.811	9.683	9.577	8.741	9.589	9.468	9.407	9.628	9.611	9.983	9.445	9.92	10.02	10.11	9.869	9.667	9.66	10.03	9.775	9.555	9.392	9.695	9.577	9.747	9.474	0.605179	0.0825519	0.0272417	0.54857	0.170001	0.0529376	0.952885	0.785255	0.830957	0.860277	0.242372	0.213718	0.98028
Dnajb6	10.66	10.62	10.53	10.32	10.41	10.39	10.59	10.46	10.47	10.37	10.37	10.56	10.45	10.3	10.09	10.37	10.32	10.38	10.47	10.36	10.48	10.85	10.33	10.46	10.5	10.32	10.41	10.45	10.62	10.58	10.24	10.37	10.18	10.38	10.34	10.17	0.843876	0.0749553	0.110331	0.900249	0.0286551	0.0379216	0.959602	0.751747	0.713731	0.945592	0.23214	0.350022	0.989854
Chil3	12.76	11.98	12.84	12.06	11.93	11.79	12.51	12.92	12.74	12.77	13.04	12.45	12.79	12.6	9.424	12.86	12.58	12.61	12.45	12.8	12.23	11.21	12.05	12.49	12.27	12.96	13.01	12.77	12.51	12.63	12.16	12.86	12.56	12.45	12.78	12.76	0.172341	0.822979	0.114741	0.193653	0.295265	0.793658	0.961829	0.368639	0.344189	0.48841	0.928481	0.350022	0.634561
Cyp3a13	5.807	6	6.267	5.833	5.322	6.129	6.19	6.209	6.508	6.358	6.15	6.459	6.833	6.375	8.253	6.539	5.907	6.375	6.109	5.7	5.858	6.833	5.285	5.977	6.409	6.492	6.728	6.443	5.672	6.644	6.714	6.555	6.34	7.055	7.14	6.022	0.129599	0.00464501	0.146277	0.114237	0.0172252	0.380496	0.961933	0.709344	0.674276	0.436398	0.0598147	0.391852	0.493579
Pbx3	7.994	7.555	7.672	8.155	7.919	7.948	8.022	8.082	7.989	8.011	7.768	7.547	7.901	7.913	3.807	8.082	7.925	8.124	8	7.895	8.129	7.943	8.055	8.006	8	7.864	8.011	7.989	8.039	8.145	8.114	7.788	8.129	8.15	8.262	8.114	0.94115	0.149798	0.130958	0.993306	0.824457	0.830987	0.963094	0.238319	0.220989	0.982651	0.347775	0.371132	0.997849
Laptm5	11.12	10.69	11.01	10.65	10.68	10.53	10.7	10.8	10.6	10.81	11.1	10.76	10.69	10.56	10.54	10.8	10.76	10.82	10.65	10.8	10.62	10.57	10.83	11.09	10.72	10.93	10.7	10.76	11.05	10.53	10.53	10.66	10.58	10.79	10.84	10.65	0.894068	0.452487	0.377593	0.8475	0.452487	0.34703	0.966616	1	0.966616	0.961989	0.664832	0.644542	0.985995
Prkci	9.976	9.731	9.926	10.26	10.01	9.905	9.856	10.08	10.12	10.23	10.26	9.907	10.31	10.32	8.665	10.35	10.01	9.993	9.76	10.21	10.24	9.692	10.34	10.07	10.06	10.21	10.31	10.38	10.1	9.96	9.901	10.22	10.15	10.2	10.42	10.24	0.559821	0.884699	0.467433	0.522362	0.459791	0.919858	0.967789	0.531595	0.558182	0.833292	0.949881	0.718545	0.963352
Arg1	3.7	3.7	4.392	3.459	4	4.954	5	4.087	4.392	3.907	4	3.585	4.907	4.644	10.45	4.644	3.459	4.322	3.807	4.392	4.585	3.807	4.585	4.17	4.755	5.087	4.644	4.248	3.7	3.907	5.615	4.858	4.459	7.948	3.907	3.807	0.8545	0.0559309	0.0814758	0.811758	0.214494	0.312415	0.969069	0.615389	0.588563	0.945592	0.205266	0.311475	0.985995
C1qc	7.814	8.16	8.384	8.405	8.214	8.344	8.229	8.439	8.224	8.267	8.496	8.033	8.451	8.317	10.02	8.414	8.205	8.375	7.901	8.358	7.889	7.7	8.234	8.322	7.966	8.295	7.768	8.349	8.558	7.768	8.185	8.375	8.43	8.185	8.234	8.2	0.767559	0.0542186	0.0987241	0.809039	0.335068	0.467656	0.969543	0.475928	0.499598	0.899981	0.200992	0.343872	0.985995
Cxcl13	6.672	7.066	6.644	6.741	6.539	7.322	5.883	6.375	6.209	6.443	8.262	7.889	7.392	6.658	10.11	6.728	6.931	7.15	6.755	6.443	6.615	6.977	7.098	6.919	6.358	6.658	6.539	7.248	7.209	6.741	5.907	6.539	6.555	6.615	7.409	6.794	0.974729	0.1083	0.115013	0.982276	0.684787	0.701123	0.969601	0.154622	0.165429	0.989558	0.285944	0.350022	0.997849
Cd27	5.728	5.248	6.066	5.672	5.833	5.492	5.807	5.644	5.833	6.022	6.109	5.672	5.883	5.322	3.807	5.426	5	5.209	5.358	5.615	6.248	5.858	6.476	6.044	6.066	6.508	6.109	5.883	6.066	6.109	6.267	5.524	5.7	5.492	3.907	3.807	0.581236	0.0807627	0.0245283	0.547986	0.0138038	0.00300011	0.972026	0.574175	0.550707	0.846483	0.239709	0.211103	0.98028
Angpt1	8.804	8.209	8.103	8.308	8.484	8.443	8.439	8.512	8.459	8.704	8.405	8.43	8.253	8.209	7.2	8.358	8.17	7.983	8.281	8.119	8.877	8.531	8.845	8.647	8.714	8.665	8.555	8.697	8.451	8.771	8.615	8.2	8.271	8.313	8.492	8.155	0.516166	0.0228784	0.00461298	0.548039	0.178173	0.0559435	0.972348	0.478373	0.45739	0.807452	0.129953	0.134694	0.98028
Lat2	7.781	7.943	7.384	6.687	7.248	7.238	7.889	6.687	6.966	7.129	7.435	8.17	6.954	6.409	3.807	6.459	6.539	6.807	7.948	6.209	7.451	8.496	7.384	7.707	8.214	7.585	7.248	6.555	7.644	7.814	7.087	6.585	6.7	6.943	3.907	6.977	0.998619	0.0158024	0.0158679	0.962714	0.0203684	0.0227105	0.974606	0.939496	0.914211	0.998619	0.1075	0.202605	0.997368
Cxcl3	3.17	3.7	3	3.459	3.322	3.459	3.585	3	3.459	3.322	2.807	3.585	2.807	3.322	3.807	3.459	3.459	3.459	5.644	3.585	3.17	3.807	3.322	3.585	3.807	3.907	3.7	3.807	3.7	3.907	3.7	3.907	3.907	3.7	3.907	3.807	0.813963	0.892021	0.710801	0.848874	0.901542	0.946679	0.974723	0.85445	0.829691	0.936441	0.949881	0.824214	0.985995
Cdh5	11.51	10.5	11.2	11.6	11.48	11.43	11.08	11.21	11.37	11.41	11.43	10.61	11.23	11.22	9.264	11.35	11.24	11.55	10.92	11.68	11.8	10.44	11.65	11.59	10.97	11.13	11.42	11.52	11.59	10.91	11.61	11.23	11.52	11.22	11.01	11.54	0.714079	0.266589	0.452173	0.745624	0.976017	0.723043	0.976257	0.417738	0.43478	0.880695	0.486936	0.711841	0.985995
Tnfaip8	8.011	7.972	8.422	7.907	7.775	8.253	7.839	8.109	8.185	8.119	8.426	7.943	8.422	7.977	8.615	7.889	7.852	8.033	7.807	8.114	7.895	7.508	8.033	8.257	7.7	8.175	7.943	7.948	8.165	7.931	7.983	8.248	8	8.384	8.468	8.165	0.748171	0.609205	0.848601	0.776871	0.0688581	0.120084	0.978713	0.341084	0.328014	0.890045	0.797199	0.900105	0.985995
Clic4	12	11.86	11.65	11.7	11.7	11.69	11.93	11.68	11.5	11.55	11.48	11.88	11.5	11.61	10.39	11.87	11.76	12.03	12.06	11.82	11.79	12.35	11.54	11.56	12	11.47	11.59	11.69	11.86	11.9	11.95	11.65	11.69	11.75	11.73	11.57	0.591811	0.188185	0.42783	0.572882	0.471656	0.874854	0.984317	0.665882	0.651721	0.855097	0.390896	0.693216	0.98028
Pggt1b	9.57	9.577	9.453	9.063	9.195	9.355	9.407	8.867	8.916	9.085	8.864	9.66	8.775	8.898	9.331	8.823	8.951	9.255	9.943	8.992	9.504	9.937	9.224	9.338	9.48	8.836	9.202	9.106	9.392	9.533	9.122	9.114	9.098	8.986	8.886	9.175	0.155484	0.0319905	0.43642	0.162689	0.0130181	0.238302	0.985601	0.785625	0.771809	0.47751	0.146808	0.699415	0.585363
Clec7a	6.943	7.077	7.248	7.492	7.392	6.615	6.409	8.145	7.679	7.658	8.087	6.322	7.895	8.071	3.807	8.281	8.464	7.011	6.794	8.109	7.276	3.807	7.972	7.833	6.285	7.748	7.665	7.524	7.658	6.508	6.687	8.234	7.331	8.52	8.811	7.972	0.686743	0.840971	0.83912	0.674435	0.135848	0.27691	0.990489	0.354808	0.360916	0.875342	0.936184	0.895224	0.985995
Ccl11	6.426	7.248	6.285	6.129	6.248	7.14	6.977	5.907	5.977	6.34	5.954	7.129	5.833	5.755	8.858	5.644	6.022	6.17	6.768	5.7	6.629	8.238	6.209	6.087	6.768	6.087	5.807	6.15	6.833	6.833	6.755	6.044	5.858	6.555	3.907	5.931	0.67129	0.670772	0.999431	0.681416	0.109585	0.227045	0.992155	0.395889	0.390535	0.875342	0.841619	0.999431	0.985995
Bid	6.858	6.476	6.375	6.629	6.209	6.781	6.15	6.322	6.109	6.476	6.6	6.15	6.741	6.585	3.807	6.672	7.295	7.044	6.229	6.7	6.781	6.672	6.943	6.931	6.229	6.555	6.375	6.248	7.022	6.285	6.585	6.508	6.57	6.443	3.907	6.555	0.531563	0.62583	0.889428	0.525947	0.134997	0.37886	0.995111	0.466929	0.470642	0.816259	0.808245	0.929972	0.967531
Pdgfa	9.461	9.461	9.747	10.48	10.03	9.807	9.476	9.892	10.01	10.18	9.97	9.669	9.993	10.17	8.589	10.26	9.858	9.916	9.864	9.804	10.44	9.451	10.57	9.992	9.794	10.17	10.18	10.41	9.869	9.917	9.932	10.05	9.989	9.893	9.967	9.92	0.867207	0.874068	0.744807	0.862224	0.769468	0.641181	0.996422	0.924098	0.920538	0.945592	0.948904	0.847579	0.985995
Fgf7	8.061	7.954	8.05	8.476	8.516	8.219	8.313	8.531	8.401	8.662	8.539	8.326	8.308	8.229	7.622	8.271	8.17	8.335	8.071	7.889	8.379	7.839	8.492	8.451	8.405	8.384	8.592	8.637	8.308	8.295	8.087	8.295	8.229	8.384	8.205	8.257	0.0513186	0.647495	0.0183368	0.0507353	0.652305	0.12499	0.996969	0.521608	0.524056	0.334302	0.822252	0.202605	0.335493
Nfil3	9.185	8.414	8.658	6.768	7.109	7.435	7.401	7.087	6.794	7.087	7.714	7.651	6.794	6.768	8.353	7.18	7.651	7.762	7.651	8.543	7.18	8.308	7.864	8.629	7.781	7.16	6.539	7.129	8.895	6.833	6.954	6.989	7.313	8.344	7.644	6.919	0.10711	0.195091	0.740068	0.106846	0.0924725	0.940498	0.999274	0.773116	0.773812	0.414999	0.398122	0.843494	0.484776
[truncated: 5 more columns]
